# Supplementary material for: Inflammatory osteolysis is regulated by site-specific ISGylation of the scaffold protein NEMO
Source: eLife. 2020 Mar 23;9:e56095. doi: 10.7554/eLife.56095 (PMC7145425; doi:10.7554/eLife.56095)
Supplement: Figure 1—source data 2. [file elife-56095-fig1-data2.xlsx]

## Sheet: Fig 1E-J
		TRAP		CTSK		MMP9		B3-Integrin		DC-STAMP		NFATC1
CtsK	Sample	Fold Change	SD	Fold Change	SD	Fold Change	SD	Fold Change	SD	Fold Change	SD	Fold Change	SD
	NM-WT−RANKL	1	0.136807	1	0.218787	1	0.0343023	1	0.261622	1	0.256886	1	0.0978691
	NM-WT+ RANKL	2165.85	180.255	9265.57	181.641	5087.4	966.58	75.8074	4.6446	321.71	33.0543	7.42	0.838833
	NM-KA−RANKL	0.892233	0.126394	2.26975	0.0111247	1.62603	0.222453	1.76382	0.343601	0.270775	0.149546	1.08184	0.0794645
	NM-KA+ RANKL	3764.4	441.791	18417.3	1082.6	8393.93	329.044	158.427	4.78135	577.47	50.8803	11.1941	1.04094
DC-STAMP
	This file contains 6 data tables and 6 info tables:
	Unpaired t test of CTSK
b3 Integrin		Data Set-A
	Table Analyzed	CTSK
	Column D	NM-KA+ RANKL
	vs.	vs.
MMP9	Column B	NM-WT+ RANKL
	Unpaired t test
	P value	0.0071
	P value summary	**
NFATc1	Significantly different (P < 0.05)?	Yes
	One- or two-tailed P value?	Two-tailed
	t, df	t=11.79, df=2
	How big is the difference?
TRAP	Mean of column B	9266
	Mean of column D	18417
	Difference between means (D - B) ± SEM	9152 ± 776.2
	95% confidence interval	5812 to 12491
	R squared (eta squared)	0.9858
	F test to compare variances
	F, DFn, Dfd
	P value
	P value summary
	Significantly different (P < 0.05)?
	Data analyzed
	Sample size, column B	2
	Sample size, column D	2
	Unpaired t test of DC-STAMP:Tabular results
		Data Set-A
	Table Analyzed	DC-STAMP
	Column D	K270A+4dR
	vs.	vs.
	Column B	NEMOWT+4dR
	Unpaired t test
	P value	0.027
	P value summary	*
	Significantly different (P < 0.05)?	Yes
	One- or two-tailed P value?	Two-tailed
	t, df	t=5.961, df=2
	How big is the difference?
	Mean of column B	321.7
	Mean of column D	577.5
	Difference between means (D - B) ± SEM	255.8 ± 42.90
	95% confidence interval	71.16 to 440.4
	R squared (eta squared)	0.9467
	F test to compare variances
	F, DFn, Dfd
	P value
	P value summary
	Significantly different (P < 0.05)?
	Data analyzed
	Sample size, column B	2
	Sample size, column D	2
	Unpaired t test of b3integrin
		Data Set-A
	Table Analyzed	b3integrin
	Column D	NM-KA+ RANKL
	vs.	vs.
	Column B	NM-WT+ RANKL
	Unpaired t test
	P value	0.0032
	P value summary	**
	Significantly different (P < 0.05)?	Yes
	One- or two-tailed P value?	Two-tailed
	t, df	t=17.53, df=2
	How big is the difference?
	Mean of column B	75.81
	Mean of column D	158.4
	Difference between means (D - B) ± SEM	82.62 ± 4.713
	95% confidence interval	62.34 to 102.9
	R squared (eta squared)	0.9935
	F test to compare variances
	F, DFn, Dfd
	P value
	P value summary
	Significantly different (P < 0.05)?
	Data analyzed
	Sample size, column B	2
	Sample size, column D	2
	Unpaired t test of MMP9:Tabular results
		Data Set-A
	Table Analyzed	MMP9
	Column D	K270A+4dR
	vs.	vs.
	Column B	NEMOWT+4dR
	Unpaired t test
	P value	0.0445
	P value summary	*
	Significantly different (P < 0.05)?	Yes
	One- or two-tailed P value?	Two-tailed
	t, df	t=4.580, df=2
	How big is the difference?
	Mean of column B	5087
	Mean of column D	8394
	Difference between means (D - B) ± SEM	3307 ± 722.0
	95% confidence interval	200.0 to 6413
	R squared (eta squared)	0.9129
	F test to compare variances
	F, DFn, Dfd
	P value
	P value summary
	Significantly different (P < 0.05)?
	Data analyzed
	Sample size, column B	2
	Sample size, column D	2
	Unpaired t test of qPCR-NFATc1:Tabular results
		Data Set-A
	Table Analyzed	qPCR-NFATc1
	Column D	K270A+4dR
	vs.	vs.
	Column B	NEMOWT+4dR
	Unpaired t test
	P value	0.0574
	P value summary	ns
	Significantly different (P < 0.05)?	No
	One- or two-tailed P value?	Two-tailed
	t, df	t=3.992, df=2
	How big is the difference?
	Mean of column B	7.42
	Mean of column D	11.19
	Difference between means (D - B) ± SEM	3.774 ± 0.9453
	95% confidence interval	-0.2932 to 7.841
	R squared (eta squared)	0.8885
	F test to compare variances
	F, DFn, Dfd
	P value
	P value summary
	Significantly different (P < 0.05)?
	Data analyzed
	Sample size, column B	2
	Sample size, column D	2
	Unpaired t test of qPCR-TRAP:Tabular results
		Data Set-A
	Table Analyzed	qPCR-TRAP
	Column D	K270A+4dR
	vs.	vs.
	Column B	NEMOWT+4dR
	Unpaired t test
	P value	0.0418
	P value summary	*
	Significantly different (P < 0.05)?	Yes
	One- or two-tailed P value?	Two-tailed
	t, df	t=4.738, df=2
	How big is the difference?
	Mean of column B	2166
	Mean of column D	3764
	Difference between means (D - B) ± SEM	1599 ± 337.4
	95% confidence interval	146.8 to 3050
	R squared (eta squared)	0.9182
	F test to compare variances
	F, DFn, Dfd
	P value
	P value summary
	Significantly different (P < 0.05)?
	Data analyzed
	Sample size, column B	2
	Sample size, column D	2
