# Supplementary material for: Inflammatory osteolysis is regulated by site-specific ISGylation of the scaffold protein NEMO
Source: eLife. 2020 Mar 23;9:e56095. doi: 10.7554/eLife.56095 (PMC7145425; doi:10.7554/eLife.56095)
Supplement: Figure 1—source data 3. [file elife-56095-fig1-data3.xlsx]

## Sheet: Sheet1
Normalised Luciferase activity
	GFP	NM-WT	NM-KA	GFP+RANKL	NM-WT+RANKL	NM-KA+RANKL				unpaired t test
	258.239	196.509	239.567	553.095	666.995	970.771				Table Analyzed	Data 1
	266.734	279.054	282.769	555.087	645.443	951.334
	252.849	194.659	247.006	584.255	572.721	824.723				Column F	Data Set-F
	228.565	235.457	230.183	559.358	472.993	736.395				vs.	vs.
avg	251.597	226.42	249.881	562.949	589.538	870.806				Column E	Data Set-E
stdev	16.3835	39.8138	22.9801	14.4423	87.5416	110.556
										Unpaired t test
										P value	0.0072
										P value summary	**
										Significantly different (P < 0.05)?	Yes
										One- or two-tailed P value?	Two-tailed
										t, df	t=3.989, df=6
										How big is the difference?
										Mean of column E	589.5
										Mean of column F	870.8
										Difference between means (F - E) ± SEM	281.3 ± 70.51
										95% confidence interval	108.7 to 453.8
										R squared (eta squared)	0.7262
										F test to compare variances
										F, DFn, Dfd	1.595, 3, 3
										P value	0.7107
										P value summary	ns
										Significantly different (P < 0.05)?	No
										Data analyzed
										Sample size, column E	4
										Sample size, column F	4
