# Supplementary material for: Inflammatory osteolysis is regulated by site-specific ISGylation of the scaffold protein NEMO
Source: eLife. 2020 Mar 23;9:e56095. doi: 10.7554/eLife.56095 (PMC7145425; doi:10.7554/eLife.56095)
Supplement: Figure 2—source data 1. [file elife-56095-fig2-data1.xlsx]

## Sheet: Fig 2E-I
	BV/TV		Conn Density		Tb.N		Tb.Th		Tb.Sp
	NM-WT	NM-KA	NM-WT	NM-KA	NM-WT	NM-KA	NM-WT	NM-KA	NM-WT	NM-KA
	0.156	0.072	103.909	40.7743	4.0312	2.288	0.0566	0.0493	0.26	0.442
	0.177	0.0953	101.717	49.5983	4.5198	3.5229	0.06	0.0518	0.2248	0.2889
	0.1944	0.0872	105.513	34.237	4.8406	3.5673	0.06	0.0491	0.2027	0.2841
	0.1598	0.1207	153.842	57.7561	3.6149	3.853	0.0556	0.057	0.2856	0.2603
	0.1363	0.0682	118.945	18.9029	3.8864	3.1134	0.0516	0.0482	0.2641	0.3247
	0.1397	0.0745	115.367	24.0801	3.9135	3.1502	0.051	0.049	0.2595	0.3184
Avg	0.160533	0.0863167	116.549	37.5581	4.1344	3.24913	0.0558	0.0507333	0.24945	0.319733
STDEV	0.0221832	0.01968	19.4907	14.8592	0.45565	0.54641	0.0039151	0.00330313	0.0300896	0.0643869
This file contains 5 data tables and 5 info tables:
Unpaired t test of BV/TV
	Data Set-A
Table Analyzed	BV/TV
Column B	NM-KA
vs.	vs.
Column A	NM-WT
Unpaired t test
P value	0.0001
P value summary	***
Significantly different (P < 0.05)?	Yes
One- or two-tailed P value?	Two-tailed
t, df	t=6.130, df=10
How big is the difference?
Mean of column A	0.1605
Mean of column B	0.08632
Difference between means (B - A) ± SEM	-0.07422 ± 0.01211
95% confidence interval	-0.1012 to -0.04724
R squared (eta squared)	0.7898
F test to compare variances
F, DFn, Dfd	1.271, 5, 5
P value	0.7991
P value summary	ns
Significantly different (P < 0.05)?	No
Data analyzed
Sample size, column A	6
Sample size, column B	6
Unpaired t test of Conn Density
	Data Set-A
Table Analyzed	Conn Density
Column B	NM-KA
vs.	vs.
Column A	NM-WT
Unpaired t test
P value	<0.0001
P value summary	****
Significantly different (P < 0.05)?	Yes
One- or two-tailed P value?	Two-tailed
t, df	t=7.895, df=10
How big is the difference?
Mean of column A	116.5
Mean of column B	37.56
Difference between means (B - A) ± SEM	-78.99 ± 10.01
95% confidence interval	-101.3 to -56.70
R squared (eta squared)	0.8617
F test to compare variances
F, DFn, Dfd	1.721, 5, 5
P value	0.566
P value summary	ns
Significantly different (P < 0.05)?	No
Data analyzed
Sample size, column A	6
Sample size, column B	6
Unpaired t test of Tb.N
	Data Set-A
Table Analyzed	Tb.N
Column B	NM-KA
vs.	vs.
Column A	NM-WT
Unpaired t test
P value	0.0123
P value summary	*
Significantly different (P < 0.05)?	Yes
One- or two-tailed P value?	Two-tailed
t, df	t=3.048, df=10
How big is the difference?
Mean of column A	4.134
Mean of column B	3.249
Difference between means (B - A) ± SEM	-0.8853 ± 0.2905
95% confidence interval	-1.532 to -0.2381
R squared (eta squared)	0.4816
F test to compare variances
F, DFn, Dfd	1.438, 5, 5
P value	0.6999
P value summary	ns
Significantly different (P < 0.05)?	No
Data analyzed
Sample size, column A	6
Sample size, column B	6
Unpaired t test of Tb.Th
	Data Set-A
Table Analyzed	Tb.Th
Column B	NM-KA
vs.	vs.
Column A	NM-WT
Unpaired t test
P value	0.0359
P value summary	*
Significantly different (P < 0.05)?	Yes
One- or two-tailed P value?	Two-tailed
t, df	t=2.423, df=10
How big is the difference?
Mean of column A	0.0558
Mean of column B	0.05073
Difference between means (B - A) ± SEM	-0.005067 ± 0.002091
95% confidence interval	-0.009726 to -0.0004072
R squared (eta squared)	0.3699
F test to compare variances
F, DFn, Dfd	1.405, 5, 5
P value	0.7182
P value summary	ns
Significantly different (P < 0.05)?	No
Data analyzed
Sample size, column A	6
Sample size, column B	6
Unpaired t test of Tb.Sp
	Data Set-A
Table Analyzed	Tb.Sp
Column B	NM-KA
vs.	vs.
Column A	NM-WT
Unpaired t test
P value	0.0359
P value summary	*
Significantly different (P < 0.05)?	Yes
One- or two-tailed P value?	Two-tailed
t, df	t=2.422, df=10
How big is the difference?
Mean of column A	0.2495
Mean of column B	0.3197
Difference between means (B - A) ± SEM	0.07028 ± 0.02901
95% confidence interval	0.005635 to 0.1349
R squared (eta squared)	0.3698
F test to compare variances
F, DFn, Dfd	4.579, 5, 5
P value	0.1204
P value summary	ns
Significantly different (P < 0.05)?	No
Data analyzed
Sample size, column A	6
Sample size, column B	6
