# Supplementary material for: Inflammatory osteolysis is regulated by site-specific ISGylation of the scaffold protein NEMO
Source: eLife. 2020 Mar 23;9:e56095. doi: 10.7554/eLife.56095 (PMC7145425; doi:10.7554/eLife.56095)
Supplement: Figure 2—source data 2. [file elife-56095-fig2-data2.xlsx]

## Sheet: Sheet1
		serum TRAP		Serum CTX
		WT	KI	WT	KI
		13.548	11.63	48.605	92.089
		1.214	11.584	105.436	114.778
		3.036	18.528	83.186	114.897
		6.546	8.694	49.4695	75.6215
		1.28	10.712	49.2795	168.053
			5.282	103.938	112.716
			13.956		86.77
			15.522
	Avg	5.1248	11.9885	73.319	109.275
	Stdev	5.18194	4.08611	27.6545	30.1744
This file contains 2 data tables and 2 info tables:
Unpaired t test of Serum TRAP
	Data Set-A
Table Analyzed	Serum TRAP
Column B	KI
vs.	vs.
Column A	WT
Unpaired t test
P value	0.0219
P value summary	*
Significantly different (P < 0.05)?	Yes
One- or two-tailed P value?	Two-tailed
t, df	t=2.666, df=11
How big is the difference?
Mean of column A	5.125
Mean of column B	11.99
Difference between means (B - A) ± SEM	6.864 ± 2.574
95% confidence interval	1.198 to 12.53
R squared (eta squared)	0.3926
F test to compare variances
F, DFn, Dfd	1.608, 4, 7
P value	0.5467
P value summary	ns
Significantly different (P < 0.05)?	No
Data analyzed
Sample size, column A	5
Sample size, column B	8
Unpaired t test of Serum CTX
	Data Set-A
Table Analyzed	Serum CTX
Column B	KI
vs.	vs.
Column A	WT
Unpaired t test
P value	0.048
P value summary	*
Significantly different (P < 0.05)?	Yes
One- or two-tailed P value?	Two-tailed
t, df	t=2.224, df=11
How big is the difference?
Mean of column A	73.32
Mean of column B	109.3
Difference between means (B - A) ± SEM	35.96 ± 16.17
95% confidence interval	0.3761 to 71.54
R squared (eta squared)	0.3102
F test to compare variances
F, DFn, Dfd	1.191, 6, 5
P value	0.867
P value summary	ns
Significantly different (P < 0.05)?	No
Data analyzed
Sample size, column A	6
Sample size, column B	7
