# Supplementary material for: Inflammatory osteolysis is regulated by site-specific ISGylation of the scaffold protein NEMO
Source: eLife. 2020 Mar 23;9:e56095. doi: 10.7554/eLife.56095 (PMC7145425; doi:10.7554/eLife.56095)
Supplement: Figure 3—source data 1. [file elife-56095-fig3-data1.xlsx]

## Sheet: Fig 3A-L
Serum Cytokines
			IL1b			IL4			IL6			IL10			IL13			IL17
			WT	KI		WT	KI		WT	KI		WT	KI		WT	KI		WT	KI
			0	6.49		0.6	1.04		0	31.15		0	1.24		30.1	182.66		1.74	1.83
			77.04	73.55		4.74	2.41		22.85	276.11		3.8	7.98		58.95	103.55		4.33	11.53
			0.86	22.38		0.74	0.62		0	307.39		0	12.73		48.81	173.92		1.24	93.19
			10.03	98.21		0.7	4.29		0	74.24		0	5.22		36.28	35.04		1.36	3.42
			241.55	30.23		12.77	0.74		9.02	27.37		6	24.37		66.61	204.94		10.66	5.38
			8.27	0		1.17	0.54		18.86	24.53		0.23	0		64.69	38.77		2.51	1.28
			37	792.34		6.5	18.62		10.46	41.57		44.05	38.07		181.78	598.15		8.17	17.79
			8.3	36.17		6.18	4		14.9	1652.52		23.02	56.71		117.71	308.38		9.8	8.17
				23.19			3.92			157.69			28.65			170.68			6.49
				538.09			50.47			1108.72			316.95			1256.63			131.96
			MCP-1			TNFa			MCSF			MIP1a			KC			GCSF
			WT	KI		WT	KI		WT	KI		WT	KI		WT	KI		WT	KI
			20.75	26.77		1.63	2.71		1.11	5.94		21.57	41.2		198.23	181.02		76.36	594.77
			131.27	133.76		17.35	22.31		3.3	63.82		70.68	80.88		165.95	238.4		363.3	2280.32
			10.94	100.62		0.67	74.63		3.3	63.82		62.96	149.79		14.08	202.98		115.5	2288.57
			21.64	189.41		3.16	27.95		2.54	4.08		29.3	276.48		66.43	215.52		42.44	456.96
			436.57	212.52		66.98	12.69		3.05	13.05		2.26	122.53		68.15	7.12		251.88	273.81
			27.59	31.6		4.55	3.38		6.76	1.57		52.27	56.47		96.99	275.32		377.02	506.09
			80.59	605.74		14.79	123.32		19.4	319.23		121.79	143.77		84.24	296.32		535.57	569.04
			50.94	175.14		13.76	52.32		17.27	34.15		163.5	156.64		45.23	375.13		278.43	15305.2
				76.7			12.72			17.27			91.42			156.86			1332.31
				490.82			113.33			70.27			426.57			191.51			2619.51
This file contains 53 data tables and 53 info tables:
Identify outliers of IL1b:Cleaned data
	WT	KI
	0	6.49
	77.04	73.55
	0.86	22.38
	10.03	98.21
		30.23
	8.27	0
	37
	8.3	36.17
		23.19
Identify outliers of IL1b:Outliers
	WT	KI
#5	241.55
#7		792.34
#10		538.09
Identify outliers of IL1b:Summary
	WT	KI
Method
ROUT (Q = 1%)
Number of points
# Y values analyzed	8	10
Outliers	1	2
Mann-Whitney test of Identify outliers of IL1b
	Data Set-A
Table Analyzed	Identify outliers of IL1b:Cleaned data
Column B	KI
vs.	vs.
Column A	WT
Mann Whitney test
P value	0.4145
Exact or approximate P value?	Exact
P value summary	ns
Significantly different (P < 0.05)?	No
One- or two-tailed P value?	Two-tailed
Sum of ranks in column A,B	48.50 , 71.50
Mann-Whitney U	20.5
Difference between medians
Median of column A	8.300, n=7
Median of column B	26.71, n=8
Difference: Actual	18.41
Difference: Hodges-Lehmann	14.91
Identify outliers of IL4:Cleaned data
	WT	KI
	0.6	1.04
	4.74	2.41
	0.74	0.62
	0.7	4.29
	12.77	0.74
	1.17	0.54
	6.5
	6.18	4
		3.92
Identify outliers of IL4:Outliers
	WT	KI
#7		18.62
#10		50.47
Identify outliers of IL4:Summary
	WT	KI
Method
ROUT (Q = 1%)
Number of points
# Y values analyzed	8	10
Outliers	0	2
Mann-Whitney test of Identify outliers of IL4
	Data Set-A
Table Analyzed	Identify outliers of IL4:Cleaned data
Column B	KI
vs.	vs.
Column A	WT
Mann Whitney test
P value	0.342
Exact or approximate P value?	Exact
P value summary	ns
Significantly different (P < 0.05)?	No
One- or two-tailed P value?	Two-tailed
Sum of ranks in column A,B	77.50 , 58.50
Mann-Whitney U	22.5
Difference between medians
Median of column A	2.955, n=8
Median of column B	1.725, n=8
Difference: Actual	-1.23
Difference: Hodges-Lehmann	-0.59
Identify outliers of IL6:Cleaned data
	WT	KI
	0	31.15
	22.85	276.11
	0	307.39
	0	74.24
	9.02	27.37
	18.86	24.53
	10.46	41.57
	14.9
		157.69
Identify outliers of IL6:Outliers
	WT	KI
#8		1652.52
#10		1108.72
Identify outliers of IL6:Summary
	WT	KI
Method
ROUT (Q = 1%)
Number of points
# Y values analyzed	8	10
Outliers	0	2
Mann-Whitney test of Identify outliers of IL6
	Data Set-A
Table Analyzed	Identify outliers of IL6:Cleaned data
Column B	KI
vs.	vs.
Column A	WT
Mann Whitney test
P value	0.0002
Exact or approximate P value?	Exact
P value summary	***
Significantly different (P < 0.05)?	Yes
One- or two-tailed P value?	Two-tailed
Sum of ranks in column A,B	36 , 100
Mann-Whitney U	0
Difference between medians
Median of column A	9.740, n=8
Median of column B	57.91, n=8
Difference: Actual	48.17
Difference: Hodges-Lehmann	46.48
Identify outliers of IL10:Cleaned data
	WT	KI
	0	1.24
	3.8	7.98
	0	12.73
	0	5.22
	6	24.37
	0.23	0
		38.07
		56.71
		28.65
Identify outliers of IL10:Outliers
	WT	KI
#7	44.05	316.95
#8	23.02
#10
Identify outliers of IL10:Summary
	WT	KI
Method
ROUT (Q = 1%)
Number of points
# Y values analyzed	8	10
Outliers	2	1
Mann-Whitney test of Identify outliers of IL10
	Data Set-A
Table Analyzed	Identify outliers of IL10:Cleaned data
Column B	KI
vs.	vs.
Column A	WT
Mann Whitney test
P value	0.0186
Exact or approximate P value?	Exact
P value summary	*
Significantly different (P < 0.05)?	Yes
One- or two-tailed P value?	Two-tailed
Sum of ranks in column A,B	28.50 , 91.50
Mann-Whitney U	7.5
Difference between medians
Median of column A	0.1150, n=6
Median of column B	12.73, n=9
Difference: Actual	12.62
Difference: Hodges-Lehmann	12.62
Identify outliers of IL17:Cleaned data
	WT	KI
	1.74	1.83
	4.33	11.53
	1.24
	1.36	3.42
	10.66	5.38
	2.51	1.28
	8.17	17.79
	9.8	8.17
		6.49
Identify outliers of IL17:Outliers
	WT	KI
#3		93.19
#10		131.96
Identify outliers of IL17:Summary
	WT	KI
Method
ROUT (Q = 1%)
Number of points
# Y values analyzed	8	10
Outliers	0	2
Mann-Whitney test of Identify outliers of IL17
	Data Set-A
Table Analyzed	Identify outliers of IL17:Cleaned data
Column B	KI
vs.	vs.
Column A	WT
Mann Whitney test
P value	0.4584
Exact or approximate P value?	Exact
P value summary	ns
Significantly different (P < 0.05)?	No
One- or two-tailed P value?	Two-tailed
Sum of ranks in column A,B	60.50 , 75.50
Mann-Whitney U	24.5
Difference between medians
Median of column A	3.420, n=8
Median of column B	5.935, n=8
Difference: Actual	2.515
Difference: Hodges-Lehmann	1.365
Identify outliers of MCP-1:Cleaned data
	WT	KI
	20.75	26.77
	131.27	133.76
	10.94	100.62
	21.64	189.41
		212.52
	27.59	31.6
	80.59	605.74
	50.94	175.14
		76.7
		490.82
Identify outliers of MCP-1:Outliers
	WT	KI
#5	436.57
Identify outliers of MCP-1:Summary
	WT	KI
Method
ROUT (Q = 1%)
Number of points
# Y values analyzed	8	10
Outliers	1	0
Mann-Whitney test of Identify outliers of MCP-1
	Data Set-A
Table Analyzed	Identify outliers of MCP-1:Cleaned data
Column B	KI
vs.	vs.
Column A	WT
Mann Whitney test
P value	0.0136
Exact or approximate P value?	Exact
P value summary	*
Significantly different (P < 0.05)?	Yes
One- or two-tailed P value?	Two-tailed
Sum of ranks in column A,B	38 , 115
Mann-Whitney U	10
Difference between medians
Median of column A	27.59, n=7
Median of column B	154.5, n=10
Difference: Actual	126.9
Difference: Hodges-Lehmann	100.4
Identify outliers of TNFa:Cleaned data
	WT	KI
	1.63	2.71
	17.35	22.31
	0.67	74.63
	3.16	27.95
		12.69
	4.55	3.38
	14.79	123.32
	13.76	52.32
		12.72
		113.33
Identify outliers of TNFa:Outliers
	WT	KI
#5	66.98
Identify outliers of TNFa:Summary
	WT	KI
Method
ROUT (Q = 1%)
Number of points
# Y values analyzed	8	10
Outliers	1	0
Mann-Whitney test of Identify outliers of TNFa
	Data Set-A
Table Analyzed	Identify outliers of TNFa:Cleaned data
Column B	KI
vs.	vs.
Column A	WT
Mann Whitney test
P value	0.0553
Exact or approximate P value?	Exact
P value summary	ns
Significantly different (P < 0.05)?	No
One- or two-tailed P value?	Two-tailed
Sum of ranks in column A,B	43 , 110
Mann-Whitney U	15
Difference between medians
Median of column A	4.550, n=7
Median of column B	25.13, n=10
Difference: Actual	20.58
Difference: Hodges-Lehmann	18.46
Identify outliers of MCSF:Cleaned data
	WT	KI
	1.11	5.94
	3.3	63.82
	3.3	63.82
	2.54	4.08
	3.05	13.05
	6.76	1.57
	19.4
	17.27	34.15
		17.27
		70.27
Identify outliers of MCSF:Outliers
	WT	KI
#7		319.23
Identify outliers of MCSF:Summary
	WT	KI
Method
ROUT (Q = 1%)
Number of points
# Y values analyzed	8	10
Outliers	0	1
Mann-Whitney test of Identify outliers of MCSF
	Data Set-A
Table Analyzed	Identify outliers of MCSF:Cleaned data
Column B	KI
vs.	vs.
Column A	WT
Mann Whitney test
P value	0.0622
Exact or approximate P value?	Exact
P value summary	ns
Significantly different (P < 0.05)?	No
One- or two-tailed P value?	Two-tailed
Sum of ranks in column A,B	52.50 , 100.5
Mann-Whitney U	16.5
Difference between medians
Median of column A	3.300, n=8
Median of column B	17.27, n=9
Difference: Actual	13.97
Difference: Hodges-Lehmann	13.97
Identify outliers of IP10:Cleaned data
	WT	KI
	171.34	86.05
	145.26	385.44
	137.74	641.16
	191.67	399.73
	169.38	424.57
	146.58	232.5
		490.21
		1657.09
		922.16
		1624.11
Identify outliers of IP10:Outliers
	WT	KI
#7	576.5
#8	331.24
Identify outliers of IP10:Summary
	WT	KI
Method
ROUT (Q = 1%)
Number of points
# Y values analyzed	8	10
Outliers	2	0
Mann-Whitney test of Identify outliers of IP10
	Data Set-A
Table Analyzed	Identify outliers of IP10:Cleaned data
Column B	KI
vs.	vs.
Column A	WT
Mann Whitney test
P value	0.0075
Exact or approximate P value?	Exact
P value summary	**
Significantly different (P < 0.05)?	Yes
One- or two-tailed P value?	Two-tailed
Sum of ranks in column A,B	27 , 109
Mann-Whitney U	6
Difference between medians
Median of column A	158.0, n=6
Median of column B	457.4, n=10
Difference: Actual	299.4
Difference: Hodges-Lehmann	292.7
Identify outliers of MIP1a:Cleaned data
	WT	KI
	21.57	41.2
	70.68	80.88
	62.96	149.79
	29.3	276.48
	2.26	122.53
	52.27	56.47
	121.79	143.77
	163.5	156.64
		91.42
		426.57
Identify outliers of MIP1a:Outliers
	WT	KI
Identify outliers of MIP1a:Summary
	WT	KI
Method
ROUT (Q = 1%)
Number of points
# Y values analyzed	8	10
Outliers	0	0
Mann-Whitney test of Identify outliers of MIP1a
	Data Set-A
Table Analyzed	Identify outliers of MIP1a:Cleaned data
Column B	KI
vs.	vs.
Column A	WT
Mann Whitney test
P value	0.0434
Exact or approximate P value?	Exact
P value summary	*
Significantly different (P < 0.05)?	Yes
One- or two-tailed P value?	Two-tailed
Sum of ranks in column A,B	53 , 118
Mann-Whitney U	17
Difference between medians
Median of column A	57.62, n=8
Median of column B	133.2, n=10
Difference: Actual	75.54
Difference: Hodges-Lehmann	70.06
Mann-Whitney test of KC
	Data Set-A
Table Analyzed	KC
Column B	KI
vs.	vs.
Column A	WT
Mann Whitney test
P value	0.0117
Exact or approximate P value?	Exact
P value summary	*
Significantly different (P < 0.05)?	Yes
One- or two-tailed P value?	Two-tailed
Sum of ranks in column A,B	48 , 123
Mann-Whitney U	12
Difference between medians
Median of column A	76.20, n=8
Median of column B	209.3, n=10
Difference: Actual	133.1
Difference: Hodges-Lehmann	130.8
Identify outliers of KC:Cleaned data
	WT	KI
	198.23	181.02
	165.95	238.4
	14.08	202.98
	66.43	215.52
	68.15	7.12
	96.99	275.32
	84.24	296.32
	45.23	375.13
		156.86
		191.51
Identify outliers of KC:Outliers
	WT	KI
Identify outliers of KC:Summary
	WT	KI
Method
ROUT (Q = 1%)
Number of points
# Y values analyzed	8	10
Outliers	0	0
Mann-Whitney test of Identify outliers of KC
	Data Set-A
Table Analyzed	Identify outliers of KC:Cleaned data
Column B	KI
vs.	vs.
Column A	WT
Mann Whitney test
P value	0.0117
Exact or approximate P value?	Exact
P value summary	*
Significantly different (P < 0.05)?	Yes
One- or two-tailed P value?	Two-tailed
Sum of ranks in column A,B	48 , 123
Mann-Whitney U	12
Difference between medians
Median of column A	76.20, n=8
Median of column B	209.3, n=10
Difference: Actual	133.1
Difference: Hodges-Lehmann	130.8
Identify outliers of IL13:Cleaned data
	WT	KI
	30.1	182.66
	58.95	103.55
	48.81	173.92
	36.28	35.04
	66.61	204.94
	64.69	38.77
	181.78	598.15
	117.71	308.38
		170.68
Identify outliers of IL13:Outliers
	WT	KI
#10		1256.63
Identify outliers of IL13:Summary
	WT	KI
Method
ROUT (Q = 1%)
Number of points
# Y values analyzed	8	10
Outliers	0	1
Mann-Whitney test of Identify outliers of IL13
	Data Set-A
Table Analyzed	Identify outliers of IL13:Cleaned data
Column B	KI
vs.	vs.
Column A	WT
Mann Whitney test
P value	0.0745
Exact or approximate P value?	Exact
P value summary	ns
Significantly different (P < 0.05)?	No
One- or two-tailed P value?	Two-tailed
Sum of ranks in column A,B	53 , 100
Mann-Whitney U	17
Difference between medians
Median of column A	61.82, n=8
Median of column B	173.9, n=9
Difference: Actual	112.1
Difference: Hodges-Lehmann	110.5
Identify outliers of GCSF:Cleaned data
	WT	KI
	76.36	594.77
	363.3	2280.32
	115.5	2288.57
	42.44	456.96
	251.88	273.81
	377.02	506.09
	535.57	569.04
	278.43
		1332.31
		2619.51
Identify outliers of GCSF:Outliers
	WT	KI
#8		15305.2
Identify outliers of GCSF:Summary
	WT	KI
Method
ROUT (Q = 1%)
Number of points
# Y values analyzed	8	10
Outliers	0	1
Mann-Whitney test of Identify outliers of GCSF
	Data Set-A
Table Analyzed	Identify outliers of GCSF:Cleaned data
Column B	KI
vs.	vs.
Column A	WT
Mann Whitney test
P value	0.0025
Exact or approximate P value?	Exact
P value summary	**
Significantly different (P < 0.05)?	Yes
One- or two-tailed P value?	Two-tailed
Sum of ranks in column A,B	42 , 111
Mann-Whitney U	6
Difference between medians
Median of column A	265.2, n=8
Median of column B	594.8, n=9
Difference: Actual	329.6
Difference: Hodges-Lehmann	486
