# Supplementary material for: Inflammatory osteolysis is regulated by site-specific ISGylation of the scaffold protein NEMO
Source: eLife. 2020 Mar 23;9:e56095. doi: 10.7554/eLife.56095 (PMC7145425; doi:10.7554/eLife.56095)
Supplement: Figure 3—source data 2. [file elife-56095-fig3-data2.xlsx]

## Sheet: Sheet1
qPCR
	TRAP		CTSK		DC-STAMP		B3integrin		NFATc1
	NM-WT	NM-KI	NM-WT	NM-KI	NM-WT	NM-KI	NM-WT	NM-KI	NM-WT	NM-KI
	1107.04	6133.51	206.495	1217.72	452.727	2439.72	206.495	1217.72	10.4097	37.2679
	990.832	6091.14	187.399	1278.26	370.286	2508.31	187.399	1278.26	8.633	35.2576
Avg	1048.94	6112.33	196.947	1247.99	411.507	2474.01	196.947	1247.99	9.52136	36.2627
STDEV	82.1739	29.958	13.5035	42.809	58.2944	48.5005	13.5035	42.809	1.25634	1.4215
This file contains 5 data tables and 5 info tables:
Unpaired t test of TRAP
	Data Set-A
Table Analyzed	TRAP
Column B	KI
vs.	vs.
Column A	WT
Unpaired t test
P value	0.0001
P value summary	***
Significantly different (P < 0.05)?	Yes
One- or two-tailed P value?	Two-tailed
t, df	t=81.87, df=2
How big is the difference?
Mean of column A	1049
Mean of column B	6112
Difference between means (B - A) ± SEM	5063 ± 61.85
95% confidence interval	4797 to 5329
R squared (eta squared)	0.9997
F test to compare variances
F, DFn, Dfd
P value
P value summary
Significantly different (P < 0.05)?
Data analyzed
Sample size, column A	2
Sample size, column B	2
Unpaired t test of qPCR-CTSK
	Data Set-A
Table Analyzed	qPCR-CTSK
Column B	KI
vs.	vs.
Column A	WT
Unpaired t test
P value	0.0009
P value summary	***
Significantly different (P < 0.05)?	Yes
One- or two-tailed P value?	Two-tailed
t, df	t=33.11, df=2
How big is the difference?
Mean of column A	196.9
Mean of column B	1248
Difference between means (B - A) ± SEM	1051 ± 31.74
95% confidence interval	914.5 to 1188
R squared (eta squared)	0.9982
F test to compare variances
F, DFn, Dfd
P value
P value summary
Significantly different (P < 0.05)?
Data analyzed
Sample size, column A	2
Sample size, column B	2
Unpaired t test of qPCR-DCSTAMP
	Data Set-A
Table Analyzed	qPCR-DCSTAMP
Column B	KI
vs.	vs.
Column A	WT
Unpaired t test
P value	0.0007
P value summary	***
Significantly different (P < 0.05)?	Yes
One- or two-tailed P value?	Two-tailed
t, df	t=38.46, df=2
How big is the difference?
Mean of column A	411.5
Mean of column B	2474
Difference between means (B - A) ± SEM	2063 ± 53.62
95% confidence interval	1832 to 2293
R squared (eta squared)	0.9987
F test to compare variances
F, DFn, Dfd
P value
P value summary
Significantly different (P < 0.05)?
Data analyzed
Sample size, column A	2
Sample size, column B	2
Unpaired t test of qPCR-b3integrin
	Data Set-A
Table Analyzed	qPCR-b3integrin
Column B	KI
vs.	vs.
Column A	WT
Unpaired t test
P value	0.0009
P value summary	***
Significantly different (P < 0.05)?	Yes
One- or two-tailed P value?	Two-tailed
t, df	t=33.11, df=2
How big is the difference?
Mean of column A	196.9
Mean of column B	1248
Difference between means (B - A) ± SEM	1051 ± 31.74
95% confidence interval	914.5 to 1188
R squared (eta squared)	0.9982
F test to compare variances
F, DFn, Dfd
P value
P value summary
Significantly different (P < 0.05)?
Data analyzed
Sample size, column A	2
Sample size, column B	2
Unpaired t test of qPCR-NFATc1
	Data Set-A
Table Analyzed	qPCR-NFATc1
Column B	KI
vs.	vs.
Column A	WT
Unpaired t test
P value	0.0025
P value summary	**
Significantly different (P < 0.05)?	Yes
One- or two-tailed P value?	Two-tailed
t, df	t=19.93, df=2
How big is the difference?
Mean of column A	9.521
Mean of column B	36.26
Difference between means (B - A) ± SEM	26.74 ± 1.341
95% confidence interval	20.97 to 32.51
R squared (eta squared)	0.995
F test to compare variances
F, DFn, Dfd
P value
P value summary
Significantly different (P < 0.05)?
Data analyzed
Sample size, column A	2
Sample size, column B	2
