# Supplementary material for: Inflammatory osteolysis is regulated by site-specific ISGylation of the scaffold protein NEMO
Source: eLife. 2020 Mar 23;9:e56095. doi: 10.7554/eLife.56095 (PMC7145425; doi:10.7554/eLife.56095)
Supplement: Figure 4—source data 2. [file elife-56095-fig4-data2.xlsx]

## Sheet: Fig 4C
	NM-WT				NM-KA
	0 hr	3 hr	6 hr		0 hr	3 hr	6 hr
	13	21	10		36	41	62
	8	16	6		27	49	68
	5	14	17		23	54	61
	5	23	16		29	42	63
	13	35	12		17	37	44
	9	19	8		9	31	44
	14	11	12		16	27	61
	10	19	7		37	29	51
	10	18	9		17	28	46
	10		28		30	30	59
			13		23	38
Avg	9.7	19.5556	12.5455		24	36.9091	55.9
STDEV	3.12872	6.82113	6.20264		8.78635	8.97167	8.82484
This file contains 1 data tables and 1 info tables:
Ordinary one-way ANOVA of LC3 puncta count:ANOVA results
	Data Set-A	Data Set-B	Data Set-C	Data Set-D	Data Set-E
Table Analyzed	LC3 puncta count
Data sets analyzed	A-C, H-J
ANOVA summary
F	54.88
P value	<0.0001
P value summary	****
Significant diff. among means (P < 0.05)?	Yes
R squared	0.8305
Brown-Forsythe test
F (DFn, DFd)	1.872 (5, 56)
P value	0.1139
P value summary	ns
Are SDs significantly different (P < 0.05)?	No
Bartlett's test
Bartlett's statistic (corrected)	10.45
P value	0.0634
P value summary	ns
Are SDs significantly different (P < 0.05)?	No
ANOVA table	SS	DF	MS	F (DFn, DFd)	P value
Treatment (between columns)	15302	5	3060	F (5, 56) = 54.88	P<0.0001
Residual (within columns)	3123	56	55.77
Total	18425	61
Data summary
Number of treatments (columns)	6
Number of values (total)	62
This file contains 1 data tables and 1 info tables:
Ordinary one-way ANOVA of LC3 puncta count:Multiple comparisons
	Data Set-A	Data Set-B	Data Set-C	Data Set-D	Data Set-E	Data Set-F	Data Set-G	Data Set-H
Number of families	1
Number of comparisons per family	15
Alpha	0.05
Tukey's multiple comparisons test	Mean Diff.	95.00% CI of diff.	Significant?	Summary	Adjusted P Value
Column A vs. Column B	-9.856	-19.98 to 0.2686	No	ns	0.0607	A-B
Column A vs. Column C	-2.845	-12.47 to 6.782	No	ns	0.9516	A-C
Column A vs. Column H	-14.3	-23.93 to -4.672	Yes	***	0.0007	A-H
Column A vs. Column I	-27.21	-36.84 to -17.58	Yes	****	<0.0001	A-I
Column A vs. Column J	-46.2	-56.05 to -36.35	Yes	****	<0.0001	A-J
Column B vs. Column C	7.01	-2.894 to 16.91	No	ns	0.3081	B-C
Column B vs. Column H	-4.444	-14.35 to 5.459	No	ns	0.7705	B-H
Column B vs. Column I	-17.35	-27.26 to -7.450	Yes	****	<0.0001	B-I
Column B vs. Column J	-36.34	-46.47 to -26.22	Yes	****	<0.0001	B-J
Column C vs. Column H	-11.45	-20.85 to -2.059	Yes	**	0.0085	C-H
Column C vs. Column I	-24.36	-33.76 to -14.97	Yes	****	<0.0001	C-I
Column C vs. Column J	-43.35	-52.98 to -33.73	Yes	****	<0.0001	C-J
Column H vs. Column I	-12.91	-22.30 to -3.514	Yes	**	0.0021	H-I
Column H vs. Column J	-31.9	-41.53 to -22.27	Yes	****	<0.0001	H-J
Column I vs. Column J	-18.99	-28.62 to -9.363	Yes	****	<0.0001	I-J
Test details	Mean 1	Mean 2	Mean Diff.	SE of diff.	n1	n2	q	DF
Column A vs. Column B	9.7	19.56	-9.856	3.431	10	9	4.062	56
Column A vs. Column C	9.7	12.55	-2.845	3.263	10	11	1.233	56
Column A vs. Column H	9.7	24	-14.3	3.263	10	11	6.198	56
Column A vs. Column I	9.7	36.91	-27.21	3.263	10	11	11.79	56
Column A vs. Column J	9.7	55.9	-46.2	3.34	10	10	19.56	56
Column B vs. Column C	19.56	12.55	7.01	3.356	9	11	2.954	56
Column B vs. Column H	19.56	24	-4.444	3.356	9	11	1.873	56
Column B vs. Column I	19.56	36.91	-17.35	3.356	9	11	7.312	56
Column B vs. Column J	19.56	55.9	-36.34	3.431	9	10	14.98	56
Column C vs. Column H	12.55	24	-11.45	3.184	11	11	5.087	56
Column C vs. Column I	12.55	36.91	-24.36	3.184	11	11	10.82	56
Column C vs. Column J	12.55	55.9	-43.35	3.263	11	10	18.79	56
Column H vs. Column I	24	36.91	-12.91	3.184	11	11	5.733	56
Column H vs. Column J	24	55.9	-31.9	3.263	11	10	13.83	56
Column I vs. Column J	36.91	55.9	-18.99	3.263	11	10	8.231	56
