# Supplementary material for: Inflammatory osteolysis is regulated by site-specific ISGylation of the scaffold protein NEMO
Source: eLife. 2020 Mar 23;9:e56095. doi: 10.7554/eLife.56095 (PMC7145425; doi:10.7554/eLife.56095)
Supplement: Figure 4—source data 3. [file elife-56095-fig4-data3.xlsx]

## Sheet: Sheet1
Change in LC3-GFP
	NM-WT	NM-KA
	-8.79563	-4.64049
	-19.3206	-5.56512
	-10.34	-4.35847
	-9.64883	1.53257
Avg	-12.0263	-3.25788
Stdev	4.90374	3.23495
This file contains 1 data tables and 1 info tables:
Unpaired t test of WT vs KA
	Data Set-A
Table Analyzed	WT vs KA
Column B	NM-KA
vs.	vs.
Column A	NM-WT
Unpaired t test
P value	0.0245
P value summary	*
Significantly different (P < 0.05)?	Yes
One- or two-tailed P value?	Two-tailed
t, df	t=2.985, df=6
How big is the difference?
Mean of column A	-12.03
Mean of column B	-3.258
Difference between means (B - A) ± SEM	8.768 ± 2.937
95% confidence interval	1.581 to 15.96
R squared (eta squared)	0.5976
F test to compare variances
F, DFn, Dfd	2.298, 3, 3
P value	0.5122
P value summary	ns
Significantly different (P < 0.05)?	No
Data analyzed
Sample size, column A	4
Sample size, column B	4
