# Supplementary material for: Inflammatory osteolysis is regulated by site-specific ISGylation of the scaffold protein NEMO
Source: eLife. 2020 Mar 23;9:e56095. doi: 10.7554/eLife.56095 (PMC7145425; doi:10.7554/eLife.56095)
Supplement: Figure 5—source data 1. [file elife-56095-fig5-data1.xlsx]

## Sheet: raw data and Stats
	NM-WT					NM-KA
Ctl	92	78	77	97	65	125	118	82	110	102
RANKL	110	125	129	167		407	207	254	263	226
Starvation	54	87	69	83	98	209	271	191
This file contains 1 data tables and 1 info tables:
2way ANOVA of Main figure:ANOVA results
	Data Set-A	Data Set-B	Data Set-C	Data Set-D	Data Set-E
Table Analyzed	Main figure
Two-way ANOVA	Ordinary
Alpha	0.05
Source of Variation	% of total variation	P value	P value summary	Significant?
Interaction	11.57	0.0058	**	Yes
Row Factor	30.04	<0.0001	****	Yes
Column Factor	38.19	<0.0001	****	Yes
ANOVA table	SS (Type III)	DF	MS	F (DFn, DFd)	P value
Interaction	21001	2	10500	F (2, 21) = 6.646	P=0.0058
Row Factor	54535	2	27267	F (2, 21) = 17.26	P<0.0001
Column Factor	69343	1	69343	F (1, 21) = 43.89	P<0.0001
Residual	33177	21	1580
Difference between column means
Predicted (LS) mean of NM-WT	97.58
Predicted (LS) mean of NM-KA	200.8
Difference between predicted means	-103.2
SE of difference	15.58
95% CI of difference	-135.6 to -70.83
Data summary
Number of columns (Column Factor)	2
Number of rows (Row Factor)	3
Number of values	27
This file contains 1 data tables and 1 info tables:
2way ANOVA of Main figure:Multiple comparisons
2way ANOVA of Main figure:Multiple comparisons
	Data Set-A	Data Set-B	Data Set-C	Data Set-D	Data Set-E	Data Set-F	Data Set-G	Data Set-H
Compare cell means regardless of rows and columns
Number of families	1
Number of comparisons per family	15
Alpha	0.05
Tukey's multiple comparisons test	Predicted (LS) mean diff.	95.00% CI of diff.	Significant?	Summary	Adjusted P Value
Ctl:NM-WT vs. Ctl:NM-KA	-25.6	-104.2 to 53.05	No	ns	0.9066
Ctl:NM-WT vs. RANKL:NM-WT	-50.95	-134.4 to 32.47	No	ns	0.4232
Ctl:NM-WT vs. RANKL:NM-KA	-189.6	-268.2 to -111.0	Yes	****	<0.0001
Ctl:NM-WT vs. Starvation:NM-WT	3.6	-75.05 to 82.25	No	ns	>0.9999
Ctl:NM-WT vs. Starvation:NM-KA	-141.9	-232.7 to -51.05	Yes	***	0.001
Ctl:NM-KA vs. RANKL:NM-WT	-25.35	-108.8 to 58.07	No	ns	0.9282
Ctl:NM-KA vs. RANKL:NM-KA	-164	-242.6 to -85.35	Yes	****	<0.0001
Ctl:NM-KA vs. Starvation:NM-WT	29.2	-49.45 to 107.8	No	ns	0.8496
Ctl:NM-KA vs. Starvation:NM-KA	-116.3	-207.1 to -25.45	Yes	**	0.0073
RANKL:NM-WT vs. RANKL:NM-KA	-138.7	-222.1 to -55.23	Yes	***	0.0005
RANKL:NM-WT vs. Starvation:NM-WT	54.55	-28.87 to 138.0	No	ns	0.3514
RANKL:NM-WT vs. Starvation:NM-KA	-90.92	-185.9 to 4.057	No	ns	0.0658
RANKL:NM-KA vs. Starvation:NM-WT	193.2	114.6 to 271.8	Yes	****	<0.0001
RANKL:NM-KA vs. Starvation:NM-KA	47.73	-43.08 to 138.5	No	ns	0.5803
Starvation:NM-WT vs. Starvation:NM-KA	-145.5	-236.3 to -54.65	Yes	***	0.0007
Test details	Predicted (LS) mean 1	Predicted (LS) mean 2	Predicted (LS) mean diff.	SE of diff.	N1	N2	q	DF
Ctl:NM-WT vs. Ctl:NM-KA	81.8	107.4	-25.6	25.14	5	5	1.44	21
Ctl:NM-WT vs. RANKL:NM-WT	81.8	132.8	-50.95	26.66	5	4	2.702	21
Ctl:NM-WT vs. RANKL:NM-KA	81.8	271.4	-189.6	25.14	5	5	10.67	21
Ctl:NM-WT vs. Starvation:NM-WT	81.8	78.2	3.6	25.14	5	5	0.2025	21
Ctl:NM-WT vs. Starvation:NM-KA	81.8	223.7	-141.9	29.03	5	3	6.912	21
Ctl:NM-KA vs. RANKL:NM-WT	107.4	132.8	-25.35	26.66	5	4	1.345	21
Ctl:NM-KA vs. RANKL:NM-KA	107.4	271.4	-164	25.14	5	5	9.226	21
Ctl:NM-KA vs. Starvation:NM-WT	107.4	78.2	29.2	25.14	5	5	1.643	21
Ctl:NM-KA vs. Starvation:NM-KA	107.4	223.7	-116.3	29.03	5	3	5.664	21
RANKL:NM-WT vs. RANKL:NM-KA	132.8	271.4	-138.7	26.66	4	5	7.354	21
RANKL:NM-WT vs. Starvation:NM-WT	132.8	78.2	54.55	26.66	4	5	2.893	21
RANKL:NM-WT vs. Starvation:NM-KA	132.8	223.7	-90.92	30.36	4	3	4.235	21
RANKL:NM-KA vs. Starvation:NM-WT	271.4	78.2	193.2	25.14	5	5	10.87	21
RANKL:NM-KA vs. Starvation:NM-KA	271.4	223.7	47.73	29.03	5	3	2.326	21
Starvation:NM-WT vs. Starvation:NM-KA	78.2	223.7	-145.5	29.03	5	3	7.087	21
