# Supplementary material for: Inflammatory osteolysis is regulated by site-specific ISGylation of the scaffold protein NEMO
Source: eLife. 2020 Mar 23;9:e56095. doi: 10.7554/eLife.56095 (PMC7145425; doi:10.7554/eLife.56095)
Supplement: Figure 6—source data 1. [file elife-56095-fig6-data1.xlsx]

## Sheet: Fig 6A Proteomics data
gene	prot_cover	prot_acc	n_pep	n_psm	prot_desc	prot_mass	uniprot_acc	refseq_acc	entrez	I126 (Ref.1)	I127N (Ref.2)	I127C (WT.D0)	I128N (WT.D2)	I128C (WT.D4)	I129N (NEMOK270A.D0)	I129C (NEMOK270A.D2)	I130N (NEMOK270A.D4)	I130C (Empty.1)	I131 (Empty.2)	N_I126 (Ref.1)	N_I127N (Ref.2)	N_I127C (WT.D0)	N_I128N (WT.D2)	N_I128C (WT.D4)	N_I129N (NEMOK270A.D0)	N_I129C (NEMOK270A.D2)	N_I130N (NEMOK270A.D4)	N_I130C (Empty.1)	N_I131 (Empty.2)	log2_R126 (Ref.1)	log2_R127N (Ref.2)	log2_R127C (WT.D0)	log2_R128N (WT.D2)	log2_R128C (WT.D4)	log2_R129N (NEMOK270A.D0)	log2_R129C (NEMOK270A.D2)	log2_R130N (NEMOK270A.D4)	log2_R130C (Empty.1)	log2_R131 (Empty.2)	N_log2_R126 (Ref.1)	N_log2_R127N (Ref.2)	N_log2_R127C (WT.D0)	N_log2_R128N (WT.D2)	N_log2_R128C (WT.D4)	N_log2_R129N (NEMOK270A.D0)	N_log2_R129C (NEMOK270A.D2)	N_log2_R130N (NEMOK270A.D4)	N_log2_R130C (Empty.1)	N_log2_R131 (Empty.2)
Aars	3.9%	SYAC_MOUSE	2	3	Alanine--tRNA ligase, cytoplasmic OS=Mus musculus GN=Aars PE=1 SV=1	122363	Q8BGQ7	NP_666329	234734	19145	11770	31318	29268	24262	19242	20604	19368			17828	12710	24868	22694	19242	18611	16805	19252			0.304	-0.386	0.956	0.944	0.771	0.3	0.245	0.014			0.201	-0.276	0.623	0.576	0.436	0.252	-0.05	0.005
Abi1	6.7%	ABI1_MOUSE	3	4	Abl interactor 1 OS=Mus musculus GN=Abi1 PE=1 SV=3	57640	Q8CBW3	NP_001070658	11308	64720	50170	89810	92040	79170	77130	93710	71450			60267	54176	71314	71367	62789	74597	76432	71021			0.172	-0.195	0.3	0.599	0.413	0.362	0.518	0.288			0.069	-0.085	-0.033	0.232	0.079	0.313	0.224	0.279
Acaa1a	20.5%	THIKA_MOUSE	6	10	3-ketoacyl-CoA thiolase A, peroxisomal OS=Mus musculus GN=Acaa1a PE=1 SV=1	48278	Q921H8	NP_570934	113868	30195	28865	34775	50290	32520	25345	40915	27700			28116	31170	27613	38994	25792	24513	33372	27534			0.089	-0.096	0.26	0.642	0.278	0.036	0.471	-0.091			-0.014	0.016	-0.072	0.274	-0.056	-0.012	0.177	-0.099
Acaca	54.6%	ACACA_MOUSE	109	252	Acetyl-CoA carboxylase 1 OS=Mus musculus GN=Acaca PE=1 SV=1	292351	Q5SWU9	NP_579938	107476	104400	84915	131400	158700	114500	76550	110400	51490			97216	91696	104337	123055	90808	74036	90045	51181			0.09	-0.097	0.576	0.7	0.199	-0.209	0.251	-0.782			-0.013	0.014	0.243	0.333	-0.136	-0.257	-0.043	-0.79
Acat1	5.7%	THIL_MOUSE	1	2	Acetyl-CoA acetyltransferase, mitochondrial OS=Mus musculus GN=Acat1 PE=1 SV=1	52463	Q8QZT1	NP_659033	110446	46240	39215	34075	46940	29015	72810	50910	160600			43058	42347	27057	36397	23011	70418	41524	159636			0.115	-0.125	-0.32	0.138	-0.563	0.763	0.254	1.912			0.012	-0.014	-0.653	-0.229	-0.897	0.715	-0.04	1.903
Acly	18.6%	ACLY_MOUSE	13	24	ATP-citrate synthase OS=Mus musculus GN=Acly PE=1 SV=1	137751	Q91V92	NP_598798	104112	51720	51680	50350	66770	51120	63340	70810	60420			48161	55807	39980	51773	40543	61260	57754	60058			0.115	-0.129	0.122	0.458	0.094	0.284	0.381	0.151			0.012	-0.018	-0.211	0.091	-0.241	0.236	0.087	0.142
Aco2	2.8%	ACON_MOUSE	1	1	Aconitate hydratase, mitochondrial OS=Mus musculus GN=Aco2 PE=1 SV=1	98755	Q99KI0	NP_542364	11429	50970	35290	59660	65680	63420	50100	58760	88750			47462	38108	47372	50928	50297	48455	47926	88217			0.241	-0.289	0.468	0.607	0.556	0.216	0.446	1.041			0.138	-0.179	0.135	0.24	0.222	0.168	0.152	1.032
Acod1	34.4%	IRG1_MOUSE	11	18	Cis-aconitate decarboxylase OS=Mus musculus GN=Acod1 PE=1 SV=2	60197	P54987	NP_032418	16365	60740	65115	107700	133200	72800	36660	57380	23600			56561	70316	85518	103283	57737	35456	46801	23459			0.119	-0.13	0.929	1.317	0.099	-0.689	0	-1.389			0.017	-0.019	0.596	0.95	-0.236	-0.737	-0.294	-1.397
Acp5	3.7%	PPA5_MOUSE	1	2	Tartrate-resistant acid phosphatase type 5 OS=Mus musculus GN=Acp5 PE=1 SV=2	40392	Q05117	NP_001095874	11433	134500	111310	77075	73095	318500	63215	86530	247150			125244	120200	61201	56678	252598	61138	70576	245666			0.127	-0.14	-0.675	-0.738	1.379	-0.961	-0.496	1.015			0.024	-0.029	-1.008	-1.105	1.044	-1.009	-0.791	1.006
Acsl1	9.4%	ACSL1_MOUSE	5	8	Long-chain-fatty-acid--CoA ligase 1 OS=Mus musculus GN=Acsl1 PE=1 SV=2	90615	P41216	NP_001289092	14081	63870	52080	94450	122900	76680	29760	48970	42050			59474	56239	74998	95296	60814	28782	39941	41798			0.117	-0.127	0.515	1.062	0.095	-0.962	-0.105	-0.654			0.014	-0.016	0.183	0.695	-0.24	-1.01	-0.399	-0.662
Acsl4	2.5%	ACSL4_MOUSE	1	3	Long-chain-fatty-acid--CoA ligase 4 OS=Mus musculus GN=Acsl4 PE=1 SV=2	95119	Q9QUJ7	NP_001028772	50790	55490	45960	76130	99390	43610	47690	55450	33850			51672	49631	60451	77066	34586	46124	45227	33647			0.13	-0.142	0.585	0.97	-0.169	-0.089	0.138	-0.534			0.027	-0.031	0.252	0.603	-0.503	-0.137	-0.156	-0.543
Actb	7.2%	ACTB_MOUSE	2	65	Actin, cytoplasmic 1 OS=Mus musculus GN=Actb PE=1 SV=1	46635	P60710	NP_031419	11461	82348	63620	88898	85515	201075	54240	55328	38108			76681	68701	70588	66309	159470	52458	45127	37878			0.126	-0.143	0.327	0.205	1.568	-0.477	-0.341	-0.828			0.024	-0.032	-0.006	-0.162	1.233	-0.525	-0.635	-0.837
Actc1	10.9%	ACTC_MOUSE	3	69	Actin, alpha cardiac muscle 1 OS=Mus musculus GN=Actc1 PE=1 SV=1	46917	P68033	NP_033738	11464	57500	39090	56720	47170	161200	30500	29380	19080			53544	42212	45038	36576	127846	29498	23963	18965			0.195	-0.229	0.455	0.25	1.911	-0.383	-0.381	-1.103			0.092	-0.118	0.123	-0.117	1.577	-0.432	-0.675	-1.111
Actg1	4.5%	ACTG_MOUSE	1	26	Actin, cytoplasmic 2 OS=Mus musculus GN=Actg1 PE=1 SV=1	46691	P63260	NP_033739	11465	43130	34590	40890	33700	164550	15650	15710	9142			40162	37352	32468	26131	130502	15135	12813	9088			0.135	-0.149	0.124	-0.134	1.957	-0.825	-0.892	-1.648			0.032	-0.038	-0.209	-0.501	1.622	-0.873	-1.186	-1.657
Actn1	1.1%	ACTN1_MOUSE	1	1	Alpha-actinin-1 OS=Mus musculus GN=Actn1 PE=1 SV=1	116006	Q7TPR4	NP_598917	109711	10220	9869	8560	9792	12630	10830	11770	13080			9517	10657	6797	7593	10017	10475	9600	13002			0.025	-0.025	-0.231	-0.037	0.33	0.109	0.229	0.381			-0.078	0.085	-0.563	-0.404	-0.004	0.06	-0.065	0.372
Actn2	1.1%	ACTN2_MOUSE	1	1	Alpha-actinin-2 OS=Mus musculus GN=Actn2 PE=1 SV=2	116713	Q9JI91	NP_150371	11472	10150	8673	5202	7638	8817	5532	10170	11560			9451	9366	4131	5923	6992	5351	8295	11491			0.109	-0.118	-0.855	-0.301	-0.094	-0.767	0.112	0.297			0.006	-0.007	-1.188	-0.668	-0.429	-0.815	-0.182	0.288
Actr1a	6.4%	ACTZ_MOUSE	2	2	Alpha-centractin OS=Mus musculus GN=Actr1a PE=1 SV=1	48201	P61164	NP_058556	54130	29980	21140	22880	28690	32520	24800	32225	22550			27917	22828	18167	22246	25792	23986	26284	22415			0.284	-0.371	-0.044	0.318	0.445	-0.076	0.433	-0.118			0.18	-0.26	-0.377	-0.048	0.111	-0.125	0.139	-0.127
Actr2	27.2%	ARP2_MOUSE	7	7	Actin-related protein 2 OS=Mus musculus GN=Actr2 PE=1 SV=1	50976	P61161	NP_666355	66713	101600	91500	71730	71580	333800	65100	78720	42830			94609	98808	56956	55503	264732	62962	64206	42573			0.089	-0.095	-0.098	-0.399	1.538	-0.644	-0.386	-0.891			-0.013	0.016	-0.431	-0.766	1.204	-0.692	-0.68	-0.899
Actr3	49.5%	ARP3_MOUSE	12	25	Actin-related protein 3 OS=Mus musculus GN=Actr3 PE=1 SV=3	53283	Q99JY9	NP_001192314	74117	131850	121850	110248	84560	446075	73558	102855	61632			122776	131581	87541	65567	353776	71141	83891	61263			0.106	-0.122	-0.246	-0.646	1.916	-0.871	-0.544	-1.019			0.002	-0.012	-0.579	-1.013	1.581	-0.919	-0.838	-1.028
Adamts16	1.2%	ATS16_MOUSE	1	1	A disintegrin and metalloproteinase with thrombospondin motifs 16 OS=Mus musculus GN=Adamts16 PE=2 SV=2	158001	Q69Z28	NP_742050	271127	559900	604400	638400	642400	756800	606800	552300	654400			521371	652668	506918	498113	600207	586868	450471	650471			-0.056	0.054	0.133	0.142	0.379	0.06	-0.076	0.169			-0.159	0.165	-0.2	-0.225	0.044	0.012	-0.37	0.16
Ahsa1	13.3%	AHSA1_MOUSE	3	6	Activator of 90 kDa heat shock protein ATPase homolog 1 OS=Mus musculus GN=Ahsa1 PE=1 SV=2	44967	Q8BK64	NP_666148	217737	25810	20530	31460	28330	30870	29640	31470	27330			24034	22170	24981	21966	24483	28666	25668	27166			0.119	-0.13	0.165	0.194	0.019	0.31	0.337	0.238			0.016	-0.019	-0.168	-0.173	-0.315	0.261	0.043	0.23
Akr1c18	7.4%	AKC1H_MOUSE	1	2	Aldo-keto reductase family 1 member C18 OS=Mus musculus GN=Akr1c18 PE=1 SV=2	44083	Q8K023	NP_001333464	105349	31865	24775	22710	21390	62795	15775	16320	52950			29672	26754	18033	16585	49802	15257	13311	52632			0.172	-0.195	-0.324	-0.409	1.151	-0.846	-0.792	0.901			0.069	-0.085	-0.656	-0.776	0.816	-0.894	-1.086	0.893
Alad	15.5%	HEM2_MOUSE	2	2	Delta-aminolevulinic acid dehydratase OS=Mus musculus GN=Alad PE=1 SV=1	39206	P10518	NP_001263375	17025	29150	25038	29765	29470	35045	34475	39520	29960			27143	27037	23635	22850	27793	33343	32233	29781			0.157	-0.184	0.207	0.193	0.49	0.411	0.654	0.212			0.054	-0.073	-0.126	-0.174	0.155	0.363	0.36	0.203
Alb	3.8%	ALBU_MOUSE	2	6	Serum albumin OS=Mus musculus GN=Alb PE=1 SV=3	82617	P07724	NP_033784	11657	92490	84250	95180	77905	98230	84580	122050	135255			86125	90978	75577	60408	77905	81802	99548	134442			0.014	-0.017	-0.064	-0.071	0.182	0.166	0.324	0.624			-0.089	0.093	-0.397	-0.438	-0.153	0.118	0.03	0.615
Aldh16a1	4.1%	A16A1_MOUSE	1	2	Aldehyde dehydrogenase family 16 member A1 OS=Mus musculus GN=Aldh16a1 PE=1 SV=2	88938	Q571I9	NP_666066	69748	24080	15815	24370	27935	21550	28085	31785	37670			22423	17078	19351	21660	17091	27162	25924	37444			0.269	-0.332	0.277	0.48	0.115	0.496	0.674	0.921			0.166	-0.221	-0.055	0.113	-0.219	0.448	0.38	0.912
Aldh2	35.6%	ALDH2_MOUSE	12	22	Aldehyde dehydrogenase, mitochondrial OS=Mus musculus GN=Aldh2 PE=1 SV=1	64119	P47738	NP_033786	11669	115292	100998	89712	102250	70620	224150	131200	104518			107359	109063	71236	79285	56007	216787	107010	103889			0.071	-0.076	-0.336	-0.076	-0.51	0.956	0.316	-0.074			-0.032	0.035	-0.669	-0.444	-0.845	0.908	0.022	-0.083
Aldoa	25.8%	ALDOA_MOUSE	5	8	Fructose-bisphosphate aldolase A OS=Mus musculus GN=Aldoa PE=1 SV=2	45975	P05064	NP_001170779	11674	63750	59810	66995	66080	84970	64470	68290	67010			59363	64586	53197	51238	67389	62352	55700	66608			0.106	-0.118	0.085	0.169	0.546	0.042	0.125	-0.246			0.003	-0.007	-0.247	-0.198	0.211	-0.007	-0.169	-0.255
Alox5ap	8.1%	AL5AP_MOUSE	1	1	Arachidonate 5-lipoxygenase-activating protein OS=Mus musculus GN=Alox5ap PE=1 SV=2	19384	P30355	NP_033793	11690	7509	5684	16230	12870	12280	12950	9621	6548			6992	6138	12887	9979	9739	12525	7847	6509			0.187	-0.215	1.299	0.964	0.897	0.973	0.544	-0.011			0.084	-0.104	0.966	0.597	0.562	0.925	0.25	-0.019
Ampd3	1.2%	AMPD3_MOUSE	1	2	AMP deaminase 3 OS=Mus musculus GN=Ampd3 PE=1 SV=2	101254	O08739	NP_001263230	11717	16610	15030	21650	23520	17660	16350	21770	14460			15467	16230	17192	18237	14006	15813	17756	14373			0.069	-0.073	0.455	0.574	0.163	0.05	0.463	-0.127			-0.034	0.038	0.122	0.207	-0.171	0.002	0.169	-0.135
Ankfy1	0.9%	ANFY1_MOUSE	1	1	Rabankyrin-5 OS=Mus musculus GN=Ankfy1 PE=1 SV=2	142600	Q810B6	NP_033801	11736	18650	16150	19990	25180	27920	17240	24180	14300			17367	17439	15873	19525	22142	16674	19722	14214			0.1	-0.108	0.2	0.533	0.682	-0.013	0.475	-0.283			-0.003	0.003	-0.133	0.166	0.348	-0.062	0.181	-0.292
Anxa1	68.8%	ANXA1_MOUSE	24	45	Annexin A1 OS=Mus musculus GN=Anxa1 PE=1 SV=2	45870	P10107	NP_034860	16952	157700	143185	108912	144680	121025	173800	207950	203350			146848	154620	86481	112183	95983	168090	169610	202129			0.053	-0.056	-0.498	-0.026	-0.212	0.163	0.464	0.602			-0.05	0.056	-0.83	-0.393	-0.546	0.114	0.17	0.593
Anxa2	37.5%	ANXA2_MOUSE	15	23	Annexin A2 OS=Mus musculus GN=Anxa2 PE=1 SV=2	46728	P07356	NP_031611	12306	71040	63510	68330	69800	64850	89750	86780	75700			66151	68583	54257	54123	51432	86803	70780	75245			0.06	-0.063	0.145	0	0.028	0.198	0.307	0.207			-0.042	0.048	-0.188	-0.367	-0.307	0.15	0.013	0.198
Ap2a2	2.5%	AP2A2_MOUSE	1	3	AP-2 complex subunit alpha-2 OS=Mus musculus GN=Ap2a2 PE=1 SV=2	117238	P17427	NP_031485	11772	9682	7226	23330	15870	21810	12330	18580	8765			9015	7803	18525	12305	17297	11926	15155	8712			0.149	-0.167	1.339	0.749	1.234	0.509	0.967	0.064			0.046	-0.056	1.006	0.382	0.899	0.46	0.673	0.055
Apaf1	0.6%	APAF_MOUSE	1	1	Apoptotic protease-activating factor 1 OS=Mus musculus GN=Apaf1 PE=1 SV=3	162730	O88879	NP_001036023	11783	15380	12930	14790	18030	12060	19430	17350	15950			14321	13962	11744	13980	9565	18792	14151	15854			0.12	-0.131	0.063	0.349	-0.231	0.457	0.294	0.172			0.017	-0.02	-0.269	-0.018	-0.566	0.409	0	0.164
Apobr	1.6%	APOBR_MOUSE	1	2	Apolipoprotein B receptor OS=Mus musculus GN=Apobr PE=1 SV=1	109631	Q8VBT6	NP_612183	171504	28580	23620	26795	25260	28165	28675	30875	25925			26614	25506	21276	19586	22337	27733	25182	25769			0.133	-0.147	0.033	-0.051	0.113	0.134	0.245	-0.018			0.03	-0.036	-0.299	-0.418	-0.222	0.086	-0.049	-0.026
Arap1	1%	ARAP1_MOUSE	1	1	Arf-GAP with Rho-GAP domain, ANK repeat and PH domain-containing protein 1 OS=Mus musculus GN=Arap1 PE=1 SV=2	178264	Q4LDD4	NP_001035200	69710	13470	5077	15000	14530	17460	9341	21440	12670			12544	5482	11910	11266	13848	9034	17488	12594			0.539	-0.869	0.694	0.648	0.913	0.01	1.209	0.45			0.436	-0.758	0.361	0.281	0.578	-0.038	0.915	0.442
Arf1	7.7%	ARF1_MOUSE	1	1	ADP-ribosylation factor 1 OS=Mus musculus GN=Arf1 PE=1 SV=2	23491	P84078	NP_001123880	11840	40560	39670	49240	44800	86150	46110	40330	54790			37769	42838	39098	34737	68324	44595	32895	54461			0.016	-0.016	0.296	0.159	1.103	0.201	0.008	0.45			-0.087	0.095	-0.037	-0.208	0.768	0.153	-0.286	0.441
Arg1	2.5%	ARGI1_MOUSE	1	1	Arginase-1 OS=Mus musculus GN=Arg1 PE=1 SV=1	41145	Q61176	NP_031508	11846	90640	80540	145900	75060	121300	111000	149200	58920			84403	86972	115851	58202	96202	107354	121692	58566			0.083	-0.088	0.769	-0.189	0.503	0.375	0.802	-0.539			-0.02	0.023	0.437	-0.556	0.169	0.327	0.508	-0.547
Arhgap1	5.5%	RHG01_MOUSE	1	1	Rho GTPase-activating protein 1 OS=Mus musculus GN=Arhgap1 PE=1 SV=1	57597	Q5FWK3	NP_001139374	228359	8460	7290	17530	14560	14510	12100	13010	8314			7877	7872	13920	11290	11508	11703	10611	8264			0.103	-0.111	1.154	0.887	0.882	0.62	0.724	0.078			0.001	-0.001	0.822	0.52	0.547	0.571	0.43	0.07
Arhgap17	5%	RHG17_MOUSE	2	2	Rho GTPase-activating protein 17 OS=Mus musculus GN=Arhgap17 PE=1 SV=1	104288	Q3UIA2	NP_001116112	70497	13914	8580	22160	17160	23156	12856	11671	14043			12957	9264	17596	13305	18365	12434	9520	13959			0.405	-0.636	1.132	0.766	0.955	0.396	0.178	0.546			0.302	-0.525	0.8	0.399	0.621	0.348	-0.117	0.537
Arhgap45	3%	HMHA1_MOUSE	1	2	Minor histocompatibility protein HA-1 OS=Mus musculus GN=Hmha1 PE=1 SV=2	138173	Q3TBD2	NP_001136173	70719	7854	3994	14505	11160	9141	8816	10515	7812			7313	4314	11518	8653	7249	8526	8576	7765			0.39	-0.579	1.277	0.878	0.622	0.494	0.83	0.293			0.287	-0.468	0.945	0.511	0.287	0.446	0.536	0.284
Arhgdia	15.7%	GDIR1_MOUSE	1	1	Rho GDP-dissociation inhibitor 1 OS=Mus musculus GN=Arhgdia PE=1 SV=3	28033	Q99PT1	NP_598557	192662	49890	39590	53730	48860	57190	57190	48750	42610			46457	42752	42664	37886	45357	55311	39762	42354			0.157	-0.176	0.264	0.127	0.354	0.354	0.124	-0.07			0.054	-0.066	-0.069	-0.24	0.02	0.306	-0.17	-0.079
Arhgdib	3.5%	GDIR2_MOUSE	1	1	Rho GDP-dissociation inhibitor 2 OS=Mus musculus GN=Arhgdib PE=1 SV=3	28164	Q61599	NP_001288230	11857	11220	8835	11950	10350	12400	7654	9936	7657			10447	9541	9490	8025	9834	7403	8105	7611			0.162	-0.183	0.253	0.046	0.306	-0.39	-0.013	-0.389			0.059	-0.072	-0.08	-0.321	-0.028	-0.438	-0.307	-0.398
Arhgef10l	1.6%	ARGAL_MOUSE	1	1	Rho guanine nucleotide exchange factor 10-like protein OS=Mus musculus GN=Arhgef10l PE=1 SV=1	155760	A2AWP8	NP_001106193	72754	2285	2306	4537	4746	4648	4337	7282	6235			2127	2490	3603	3679	3685	4194	5939	6198			-0.007	0.007	0.983	1.048	1.018	0.918	1.666	1.442			-0.109	0.117	0.65	0.681	0.683	0.87	1.372	1.433
Arpc1b	37.9%	ARC1B_MOUSE	10	19	Actin-related protein 2/3 complex subunit 1B OS=Mus musculus GN=Arpc1b PE=1 SV=4	48023	Q9WV32	NP_075631	11867	90275	71875	76860	59655	260650	55682	64025	44775			84063	77615	61030	46256	206717	53854	52221	44506			0.088	-0.092	-0.302	-0.59	1.826	-0.609	-0.387	-0.819			-0.016	0.018	-0.635	-0.956	1.492	-0.657	-0.682	-0.827
Arpc2	20%	ARPC2_MOUSE	4	6	Actin-related protein 2/3 complex subunit 2 OS=Mus musculus GN=Arpc2 PE=1 SV=3	40408	Q9CVB6	NP_083987	76709	26070	18790	26745	13982	113495	11353	23242	12634			24275	20290	21237	10841	90011	10979	18958	12558			0.096	-0.103	-0.038	-0.681	1.787	-0.486	0.127	-0.786			-0.007	0.008	-0.371	-1.048	1.451	-0.534	-0.167	-0.795
Arpc3	37.6%	ARPC3_MOUSE	6	12	Actin-related protein 2/3 complex subunit 3 OS=Mus musculus GN=Arpc3 PE=1 SV=3	25094	Q9JM76	NP_062798	56378	72870	67880	62095	46645	256700	42325	53000	32905			67855	73300	49306	36168	203585	40935	43228	32708			0.088	-0.095	-0.272	-0.736	1.9	-0.933	-0.554	-1.06			-0.014	0.016	-0.604	-1.103	1.565	-0.982	-0.848	-1.069
Arpc4	46.4%	ARPC4_MOUSE	7	13	Actin-related protein 2/3 complex subunit 4 OS=Mus musculus GN=Arpc4 PE=1 SV=3	22977	P59999	NP_001163956	68089	152950	142185	141500	104400	443450	91700	120965	59660			142424	153541	112357	80952	351694	88688	98662	59302			0.124	-0.136	-0.061	-0.401	1.563	-0.449	-0.263	-1.265			0.021	-0.025	-0.394	-0.768	1.229	-0.497	-0.557	-1.274
Arpc5	41.7%	ARPC5_MOUSE	4	7	Actin-related protein 2/3 complex subunit 5 OS=Mus musculus GN=Arpc5 PE=1 SV=3	19773	Q9CPW4	NP_080645	67771	77605	73985	56205	43728	278575	45958	50978	39270			72264	79894	44630	33907	220934	44448	41578	39034			0.038	-0.04	-0.301	-0.809	1.799	-0.521	-0.295	-0.922			-0.064	0.07	-0.634	-1.176	1.464	-0.569	-0.589	-0.93
Asns	3.6%	ASNS_MOUSE	1	2	Asparagine synthetase [glutamine-hydrolyzing] OS=Mus musculus GN=Asns PE=1 SV=3	73806	Q61024	NP_036185	27053	21470	13510	50335	56225	28720	12830	17235	12210			19993	14589	39968	43596	22778	12409	14058	12136			0.298	-0.377	1.519	1.686	0.717	-0.441	-0.012	-0.513			0.195	-0.266	1.186	1.319	0.382	-0.489	-0.306	-0.521
Ass1	19.7%	ASSY_MOUSE	8	9	Argininosuccinate synthase OS=Mus musculus GN=Ass1 PE=1 SV=1	54632	P16460	NP_031520	11898	42485	32185	43650	50280	64140	27205	43380	25885			39561	34755	34659	38987	50869	26311	35382	25730			0.18	-0.207	0.022	0.419	0.626	-0.635	0.386	-0.497			0.078	-0.097	-0.312	0.052	0.291	-0.683	0.092	-0.505
Atad3	1.2%	ATAD3_MOUSE	1	1	ATPase family AAA domain-containing protein 3 OS=Mus musculus GN=Atad3 PE=1 SV=1	76038	Q925I1	NP_849534	108888	29110	22640	29830	25460	86630	9903	13810	12370			27106	24448	23687	19741	68705	9578	11264	12296			0.17	-0.193	0.205	-0.023	1.743	-1.386	-0.906	-1.065			0.067	-0.082	-0.128	-0.39	1.409	-1.434	-1.2	-1.073
Atg13	1.7%	ATG13_MOUSE	1	1	Autophagy-related protein 13 OS=Mus musculus GN=Atg13 PE=1 SV=2	62132	Q91YI1	NP_663503	51897	14690	14010	17750	19570	15650	15970	24710	10610			13680	15130	14094	15175	12412	15446	20154	10546			0.034	-0.035	0.307	0.448	0.125	0.154	0.784	-0.436			-0.069	0.076	-0.026	0.081	-0.209	0.106	0.49	-0.444
Atg16l1	6.1%	A16L1_MOUSE	2	3	Autophagy-related protein 16-1 OS=Mus musculus GN=Atg16l1 PE=1 SV=1	77752	Q8C0J2	NP_001192320	77040	14420	10896	17463	18884	20178	14544	18372	17548			13428	11765	13866	14643	16002	14067	14985	17442			0.218	-0.273	0.404	0.344	0.696	0.164	0.482	0.554			0.116	-0.162	0.072	-0.024	0.362	0.116	0.188	0.545
Atg7	3.6%	ATG7_MOUSE	2	3	Ubiquitin-like modifier-activating enzyme ATG7 OS=Mus musculus GN=Atg7 PE=1 SV=1	87319	Q9D906	NP_001240646	74244	27088	24578	27490	32265	18108	30840	33975	33538			25224	26540	21829	25018	14362	29827	27711	33336			0.068	-0.074	0.098	0.326	-0.506	0.268	0.407	0.386			-0.034	0.037	-0.236	-0.041	-0.841	0.22	0.113	0.377
Atox1	20.6%	ATOX1_MOUSE	1	1	Copper transport protein ATOX1 OS=Mus musculus GN=Atox1 PE=1 SV=1	9338	O08997	NP_033850	11927	229300	158100	153400	205600	149400	188200	261200	345900			213521	170725	121806	159420	118487	182018	213042	343823			0.243	-0.293	-0.337	0.086	-0.375	-0.042	0.431	0.837			0.141	-0.182	-0.669	-0.281	-0.709	-0.09	0.137	0.828
Atp2a2	6.8%	AT2A2_MOUSE	4	5	Sarcoplasmic/endoplasmic reticulum calcium ATPase 2 OS=Mus musculus GN=Atp2a2 PE=1 SV=2	130416	O55143	NP_001103610	11938	49505	45085	58915	61132	50142	41970	59835	43655			46098	48685	46781	47402	39767	40591	48803	43393			0.066	-0.068	0.338	0.403	0.211	-0.041	0.38	-0.051			-0.037	0.042	0.005	0.036	-0.123	-0.09	0.086	-0.06
Atp2b1	1.5%	AT2B1_MOUSE	1	2	Plasma membrane calcium-transporting ATPase 1 OS=Mus musculus GN=Atp2b1 PE=1 SV=1	156256	G5E829	NP_080758	67972	23730	20325	30325	30570	25150	28255	29155	26305			22097	21948	24079	23703	19947	27327	23779	26147			0.111	-0.123	0.465	0.477	0.195	0.362	0.4	0.26			0.008	-0.012	0.132	0.11	-0.139	0.314	0.106	0.251
Atp5f1a	22.1%	ATPA_MOUSE	8	12	ATP synthase subunit alpha, mitochondrial OS=Mus musculus GN=Atp5a1 PE=1 SV=1	67163	Q03265	NP_031531	11946	110110	95320	86300	100600	149550	87940	107260	163050			102533	102933	68525	78005	118605	85051	87484	162071			0.128	-0.14	-0.076	0.16	0.68	-0.126	0.184	0.652			0.024	-0.028	-0.409	-0.208	0.345	-0.174	-0.11	0.643
Atp5f1b	15.7%	ATPB_MOUSE	5	5	ATP synthase subunit beta, mitochondrial OS=Mus musculus GN=Atp5b PE=1 SV=2	61765	P56480	NP_058054	11947	20170	17440	21440	24550	28420	19740	23770	46040			18781	18833	17024	19036	22539	19091	19387	45763			0.046	-0.048	0.259	0.385	0.596	0.07	0.338	0.064			-0.057	0.063	-0.074	0.018	0.261	0.022	0.044	0.055
Atp5f1c	4.4%	ATPG_MOUSE	1	1	ATP synthase subunit gamma, mitochondrial OS=Mus musculus GN=Atp5c1 PE=1 SV=1	39396	Q91VR2	NP_065640	11949	6388	5345	10430	10070	9848	5834	7132	6649			5949	5772	8282	7809	7810	5642	5817	6610			0.123	-0.134	0.83	0.779	0.747	-0.008	0.282	0.181			0.02	-0.023	0.497	0.412	0.413	-0.056	-0.012	0.172
Atp5pb	5.1%	AT5F1_MOUSE	1	1	ATP synthase F(0) complex subunit B1, mitochondrial OS=Mus musculus GN=Atp5f1 PE=1 SV=1	34544	Q9CQQ7	NP_033855	11950	32540	21460	43410	44460	36150	40790	42010	72390			30301	23174	34469	34473	28670	39450	34264	71956			0.269	-0.331	0.685	0.72	0.421	0.595	0.638	1.423			0.166	-0.22	0.352	0.353	0.087	0.547	0.344	1.414
Atp5pd	23.6%	ATP5H_MOUSE	2	4	ATP synthase subunit d, mitochondrial OS=Mus musculus GN=Atp5h PE=1 SV=3	23149	Q9DCX2	NP_082138	71679	73595	62800	61255	70825	133200	59735	74610	126250			68531	67814	48639	54918	105639	57773	60853	125492			0.085	-0.092	-0.062	0.06	1.03	-0.187	0.118	0.943			-0.018	0.019	-0.394	-0.308	0.697	-0.235	-0.177	0.934
Atp5po	5.2%	ATPO_MOUSE	1	1	ATP synthase subunit O, mitochondrial OS=Mus musculus GN=Atp5o PE=1 SV=1	28447	Q9DB20	NP_613063	28080	25400	29260	24900	21440	63210	15160	19480	29310			23651	31596	19772	16625	50131	14662	15888	29134			-0.106	0.098	-0.134	-0.35	1.21	-0.85	-0.488	0.101			-0.209	0.209	-0.467	-0.717	0.875	-0.898	-0.783	0.092
Atp6v0d1	2.3%	VA0D1_MOUSE	1	1	V-type proton ATPase subunit d 1 OS=Mus musculus GN=Atp6v0d1 PE=1 SV=2	45085	P51863	NP_038505	11972	11500	10370	13000	9405	33510	7523	6727	7787			10709	11197	10322	7292	26577	7275	5487	7741			0.073	-0.077	0.25	-0.217	1.616	-0.54	-0.701	-0.49			-0.03	0.034	-0.083	-0.584	1.281	-0.588	-0.995	-0.499
Atp6v1a	19.8%	VATA_MOUSE	9	13	V-type proton ATPase catalytic subunit A OS=Mus musculus GN=Atp6v1a PE=1 SV=2	76875	P50516	NP_031534	11964	38470	42810	41750	47830	93020	38080	44190	91860			35823	46229	33151	37086	73773	36829	36043	91308			0.099	-0.106	-0.059	-0.112	0.929	-0.094	0.06	0.804			-0.004	0.005	-0.392	-0.479	0.594	-0.142	-0.234	0.795
Atp6v1b2	43.2%	VATB2_MOUSE	11	17	V-type proton ATPase subunit B, brain isoform OS=Mus musculus GN=Atp6v1b2 PE=1 SV=1	62128	P62814	NP_031535	11966	25680	14050	25455	23320	42270	20400	22050	33270			23913	15173	20213	18082	33524	19729	17984	33070			0.224	-0.269	0.301	0.26	1.089	0.107	0.34	0.667			0.122	-0.158	-0.032	-0.107	0.755	0.059	0.046	0.659
Atp6v1e1	11.9%	VATE1_MOUSE	2	4	V-type proton ATPase subunit E 1 OS=Mus musculus GN=Atp6v1e1 PE=1 SV=2	31927	P50518	NP_031536	11973	30150	26200	29280	23721	60450	20244	27225	41935			28075	28292	23250	18394	47942	19580	22205	41683			0.124	-0.139	-0.001	-0.37	1.03	-0.514	0.099	0.736			0.022	-0.028	-0.334	-0.736	0.695	-0.562	-0.195	0.727
Atp6v1h	8.7%	VATH_MOUSE	2	5	V-type proton ATPase subunit H OS=Mus musculus GN=Atp6v1h PE=1 SV=1	63838	Q8BVE3	NP_001297371	108664	81280	68925	128208	109858	147910	68735	81195	72995			75687	74430	101802	85184	117306	66477	66224	72557			0.136	-0.158	0.648	0.389	0.817	-0.096	0.286	-0.006			0.034	-0.047	0.315	0.022	0.483	-0.144	-0.009	-0.015
B4gat1	1.7%	B4GA1_MOUSE	1	1	Beta-1,4-glucuronyltransferase 1 OS=Mus musculus GN=B4gat1 PE=1 SV=1	51018	Q8BWP8	NP_780592	108902	19250	21560	22250	20950	24630	26120	25600	17930			17925	23282	17668	16244	19535	25262	20880	17822			-0.084	0.079	0.125	0.038	0.271	0.356	0.327	-0.187			-0.187	0.19	-0.208	-0.329	-0.063	0.308	0.033	-0.195
Banf1	37.1%	BAF_MOUSE	2	2	Barrier-to-autointegration factor OS=Mus musculus GN=Banf1 PE=1 SV=1	12387	O54962	NP_001033320	23825	31770	36780	45100	29520	100450	20765	26344	15147			29583	39717	35811	22890	79665	20083	21488	15056			-0.148	0.131	0.41	-0.153	1.54	-0.626	-0.56	-1.184			-0.25	0.242	0.076	-0.52	1.205	-0.674	-0.853	-1.193
Blmh	5.5%	BLMH_MOUSE	2	3	Bleomycin hydrolase OS=Mus musculus GN=Blmh PE=1 SV=1	61354	Q8R016	NP_848760	104184	75185	75430	103095	63612	91130	90085	129380	53825			70011	81454	81861	49324	72273	87127	105526	53502			-0.001	0.001	0.54	-0.188	0.368	0.242	0.75	-0.473			-0.104	0.112	0.208	-0.554	0.034	0.194	0.456	-0.482
Bola2	22.1%	BOLA2_MOUSE	1	1	BolA-like protein 2 OS=Mus musculus GN=Bola2 PE=1 SV=1	11468	Q8BGS2	NP_780312	66162	61070	46350	52460	54960	58260	51850	57070	36730			56867	50051	41656	42616	46205	50147	46548	36509			0.185	-0.213	-0.034	0.033	0.117	-0.051	0.088	-0.548			0.082	-0.102	-0.367	-0.334	-0.217	-0.099	-0.206	-0.557
Brk1	22.7%	BRK1_MOUSE	2	2	Protein BRICK1 OS=Mus musculus GN=Brk1 PE=1 SV=1	9958	Q91VR8	NP_598698	101314	51195	43725	31720	43825	46145	42950	54585	46395			47672	47216	25187	33982	36597	41538	44521	46116			0.11	-0.118	-0.572	-0.083	-0.007	-0.138	0.196	0			0.007	-0.008	-0.904	-0.45	-0.343	-0.186	-0.098	-0.009
C1qa	24.1%	C1QA_MOUSE	4	5	Complement C1q subcomponent subunit A OS=Mus musculus GN=C1qa PE=1 SV=2	29165	P98086	NP_031598	12259	28048	25220	17400	14893	17421	40515	53742	55142			26118	27234	13816	11547	13817	39184	43834	54811			0.109	-0.132	-0.934	-0.69	-0.885	0.777	0.986	0.868			0.007	-0.022	-1.267	-1.057	-1.22	0.729	0.692	0.859
C1qb	20.2%	C1QB_MOUSE	3	3	Complement C1q subcomponent subunit B OS=Mus musculus GN=C1qb PE=1 SV=2	30595	P14106	NP_033907	12260	76640	68020	49620	40960	46150	82680	123200	98900			71367	73452	39400	31760	36601	79964	100485	98306			0.09	-0.096	-0.683	-0.636	-0.536	0.517	0.768	0.451			-0.013	0.015	-1.016	-1.003	-0.871	0.468	0.474	0.443
C1qc	7.3%	C1QC_MOUSE	1	1	Complement C1q subcomponent subunit C OS=Mus musculus GN=C1qc PE=1 SV=2	28666	Q02105	NP_031600	12262	71400	64630	53550	55520	50850	95040	99290	106200			66487	69791	42522	43049	40329	91918	80984	105562			0.07	-0.074	-0.345	-0.293	-0.42	0.483	0.546	0.643			-0.033	0.037	-0.678	-0.66	-0.754	0.434	0.252	0.634
C3	4.7%	CO3_MOUSE	5	10	Complement C3 OS=Mus musculus GN=C3 PE=1 SV=3	215405	P01027	NP_033908	12266	105700	104300	106800	122000	126200	96900	117600	119500			98426	112630	84804	94598	100088	93717	95918	118782			0.113	-0.125	0.025	0.216	0.265	-0.116	0.168	0.187			0.01	-0.014	-0.308	-0.151	-0.069	-0.164	-0.127	0.178
C4b	0.7%	CO4B_MOUSE	1	1	Complement C4-B OS=Mus musculus GN=C4b PE=1 SV=3	214384	P01029	NP_033910	12268	38230	29720	40630	44980	45780	32850	41650	34920			35599	32093	32262	34877	36308	31771	33971	34710			0.17	-0.193	0.258	0.405	0.43	-0.049	0.294	0.04			0.067	-0.082	-0.075	0.038	0.096	-0.097	0	0.031
Ca5b	2.2%	CAH5B_MOUSE	1	1	Carbonic anhydrase 5B, mitochondrial OS=Mus musculus GN=Ca5b PE=1 SV=2	41124	Q9QZA0	NP_851832	56078	13250	7433	9495	7270	10300	9912	13340	5328			12338	8026	7540	5638	8168	9586	10880	5296			0.358	-0.476	-0.123	-0.508	-0.006	-0.061	0.367	-0.957			0.255	-0.366	-0.456	-0.875	-0.34	-0.109	0.073	-0.965
Cacybp	6.6%	CYBP_MOUSE	1	2	Calcyclin-binding protein OS=Mus musculus GN=Cacybp PE=1 SV=1	34170	Q9CXW3	NP_033916	12301	30135	19450	37695	39125	35955	34785	42030	57235			28062	21004	29931	30337	28515	33642	34281	56891			0.281	-0.35	0.608	0.658	0.535	0.487	0.761	1.2			0.178	-0.239	0.275	0.291	0.201	0.438	0.467	1.191
Cad	0.5%	PYR1_MOUSE	1	1	CAD protein OS=Mus musculus GN=Cad PE=1 SV=1	266045	B2RQC6	NP_001276451	69719	23220	18230	26730	28610	25740	21230	23710	27360			21622	19686	21225	22185	20415	20533	19339	27196			0.164	-0.185	0.367	0.465	0.313	0.035	0.194	0.401			0.061	-0.074	0.034	0.098	-0.022	-0.013	-0.1	0.392
Calm1	77.9%	CALM_MOUSE	7	21	Calmodulin OS=Mus musculus GN=Calm1 PE=1 SV=2	18889				199300	170210	210700	183750	600850	76740	94350	43960			185586	183803	167305	142478	476526	74218	76954	43696			0.06	-0.094	0.174	0.065	1.824	-1.101	-0.842	-1.695			-0.043	0.016	-0.159	-0.302	1.489	-1.149	-1.136	-1.703
Calr	3.1%	CALR_MOUSE	1	1	Calreticulin OS=Mus musculus GN=Calr PE=1 SV=1	58219	P14211	NP_031617	12317	76190	69110	85890	87560	101600	59780	81470	74490			70947	74630	68200	67894	80577	57817	66449	74043			0.069	-0.072	0.242	0.269	0.484	-0.281	0.165	0.036			-0.034	0.039	-0.091	-0.098	0.149	-0.329	-0.129	0.027
Camk2d	19.8%	KCC2D_MOUSE	6	10	Calcium/calmodulin-dependent protein kinase type II subunit delta OS=Mus musculus GN=Camk2d PE=1 SV=1	65440	Q6PHZ2	NP_001020609	108058	43382	38715	51460	59222	54185	48182	50925	29090			40397	41807	40861	45920	42974	46600	41535	28916			0.104	-0.112	0.208	0.368	0.101	0.31	0.238	-0.306			0.002	-0.002	-0.124	0.002	-0.233	0.262	-0.056	-0.315
Cand1	0.7%	CAND1_MOUSE	1	1	Cullin-associated NEDD8-dissociated protein 1 OS=Mus musculus GN=Cand1 PE=1 SV=2	155830	Q6ZQ38	NP_082270	71902	26470	25840	29560	30990	26390	29620	27800	25270			24649	27904	23471	24030	20929	28648	22675	25119			0.017	-0.017	0.177	0.245	0.013	0.179	0.088	-0.05			-0.086	0.093	-0.156	-0.122	-0.322	0.131	-0.206	-0.058
Cap1	21.5%	CAP1_MOUSE	5	9	Adenylyl cyclase-associated protein 1 OS=Mus musculus GN=Cap1 PE=1 SV=4	61270	P40124	NP_001287996	12331	51630	42900	50440	59660	55330	60640	65330	57780			48077	46326	40052	46260	43882	58648	53285	57432			0.127	-0.14	0.626	0.918	0.278	0.358	0.513	0.155			0.025	-0.029	0.293	0.551	-0.057	0.31	0.219	0.146
Capn2	1.9%	CAN2_MOUSE	1	1	Calpain-2 catalytic subunit OS=Mus musculus GN=Capn2 PE=1 SV=4	90302	O08529	NP_033924	12334	12940	11910	9703	10290	9447	11120	16330	10690			12049	12862	7704	7979	7492	10755	13319	10626			0.059	-0.061	-0.357	-0.272	-0.395	-0.16	0.394	-0.217			-0.044	0.05	-0.689	-0.639	-0.73	-0.208	0.1	-0.226
Capns1	3.3%	CPNS1_MOUSE	1	1	Calpain small subunit 1 OS=Mus musculus GN=Capns1 PE=1 SV=1	31309	O88456	NP_033925	12336	15400	11400	25370	30800	14360	25030	28560	18040			14340	12311	20145	23881	11388	24207	23295	17932			0.201	-0.233	0.921	1.201	0.1	0.901	1.092	0.429			0.098	-0.122	0.588	0.834	-0.235	0.853	0.798	0.42
Capza1	44.1%	CAZA1_MOUSE	7	16	F-actin-capping protein subunit alpha-1 OS=Mus musculus GN=Capza1 PE=1 SV=4	37674	P47753			54960	40360	55180	48930	92705	41120	51270	38620			51178	43583	43815	37940	73524	39770	41817	38388			0.118	-0.129	0.275	0.021	0.913	-0.075	0.082	-0.253			0.015	-0.018	-0.057	-0.346	0.579	-0.123	-0.212	-0.262
Capza2	48.6%	CAZA2_MOUSE	9	16	F-actin-capping protein subunit alpha-2 OS=Mus musculus GN=Capza2 PE=1 SV=3	38159	P47754	NP_031630	12343	81410	76245	87420	77940	134500	57280	74725	51430			75808	82334	69415	60434	106670	55398	60947	51121			0.11	-0.121	0.169	-0.015	0.975	-0.227	-0.146	-0.501			0.007	-0.01	-0.164	-0.382	0.64	-0.275	-0.44	-0.51
Capzb	46.6%	CAPZB_MOUSE	8	17	F-actin-capping protein subunit beta OS=Mus musculus GN=Capzb PE=1 SV=3	36423	P47757	NP_001032850	12345	82740	78935	88658	102200	175950	72460	76630	70088			77046	85239	70398	79245	139544	70080	62502	69667			0.073	-0.076	0.272	0.084	1.042	-0.134	-0.087	-0.285			-0.03	0.035	-0.061	-0.283	0.708	-0.182	-0.381	-0.294
Cars	4.5%	SYCC_MOUSE	2	2	Cysteine--tRNA ligase, cytoplasmic OS=Mus musculus GN=Cars PE=1 SV=2	110781	Q9ER72	NP_001239522	27267	19740	14694	31235	31975	25840	23135	29455	24230			18382	15869	24801	24794	20492	22375	24024	24084			0.176	-0.204	0.736	0.732	0.446	0.408	0.66	0.356			0.074	-0.094	0.402	0.366	0.112	0.359	0.366	0.348
Casp8	10%	CASP8_MOUSE	3	3	Caspase-8 OS=Mus musculus GN=Casp8 PE=1 SV=1	65686	O89110	NP_001073595	12370	27860	23830	27870	36270	31650	28250	40470	35470			25943	25733	22130	28123	25102	27322	33008	35257			0.108	-0.117	0.109	0.51	0.273	0.186	0.647	0.457			0.005	-0.006	-0.224	0.143	-0.061	0.138	0.353	0.448
Cast	6.9%	ICAL_MOUSE	2	2	Calpastatin OS=Mus musculus GN=Cast PE=1 SV=2	108244	P51125	NP_001288082	12380	10950	9055	16845	12160	16610	14145	14325	13290			10197	9779	13376	9429	13173	13680	11684	13210			0.152	-0.179	0.804	0.334	0.784	0.539	0.548	0.436			0.05	-0.068	0.471	-0.033	0.449	0.49	0.254	0.427
Cat	14%	CATA_MOUSE	4	7	Catalase OS=Mus musculus GN=Cat PE=1 SV=4	67605	P24270	NP_033934	12359	28065	23725	29638	32450	21830	38838	31755	19422			26134	25619	23533	25161	17314	37562	25901	19306			0.154	-0.173	0.244	0.466	0.063	0.482	0.244	-0.442			0.052	-0.062	-0.088	0.099	-0.271	0.434	-0.05	-0.451
Ccdc22	5.4%	CCD22_MOUSE	1	1	Coiled-coil domain-containing protein 22 OS=Mus musculus GN=Ccdc22 PE=1 SV=1	77214	Q9JIG7	NP_613069	54638	5768	2852	8930	10370	6824	10230	9017	9216			5372	3079	7090	8041	5412	9894	7354	9160			0.42	-0.596	1.051	1.267	0.663	1.247	1.065	1.096			0.318	-0.485	0.718	0.9	0.328	1.199	0.771	1.088
Ccl9	10.7%	CCL9_MOUSE	1	1	C-C motif chemokine 9 OS=Mus musculus GN=Ccl9 PE=1 SV=1	15579	P51670	NP_035468	20308	32170	24950	37050	39450	38810	26910	34290	26780			29956	26942	29419	30589	30780	26026	27967	26619			0.172	-0.195	0.375	0.466	0.442	-0.086	0.264	-0.093			0.069	-0.084	0.043	0.099	0.108	-0.134	-0.03	-0.102
Cct2	18.3%	TCPB_MOUSE	6	9	T-complex protein 1 subunit beta OS=Mus musculus GN=Cct2 PE=1 SV=4	66491	P80314	NP_031662	12461	39885	24985	48010	48920	68915	41352	48712	30120			37140	26980	38121	37932	54656	39994	39731	29939			0.065	-0.07	0.353	0.53	0.696	0.194	0.552	-0.09			-0.038	0.042	0.021	0.163	0.361	0.146	0.258	-0.099
Cct3	13%	TCPG_MOUSE	5	7	T-complex protein 1 subunit gamma OS=Mus musculus GN=Cct3 PE=1 SV=1	69411	P80318	NP_033966	12462	78110	60970	79470	91740	126100	74610	90730	64505			72734	65839	63103	71134	100007	72159	74001	64118			0.112	-0.122	0.15	0.357	0.626	-0.081	0.289	-0.176			0.009	-0.011	-0.183	-0.01	0.292	-0.129	-0.005	-0.185
Cct4	15.4%	TCPD_MOUSE	5	7	T-complex protein 1 subunit delta OS=Mus musculus GN=Cct4 PE=1 SV=3	67709	P80315	NP_033967	12464	36320	27210	39880	43590	51450	30950	35140	24100			33821	29383	31666	33799	40804	29933	28661	23955			0.193	-0.313	0.151	0.495	0.844	-0.037	0.31	-0.316			0.09	-0.202	-0.182	0.128	0.509	-0.086	0.016	-0.324
Cct5	19.2%	TCPE_MOUSE	6	10	T-complex protein 1 subunit epsilon OS=Mus musculus GN=Cct5 PE=1 SV=1	70354	P80316	NP_001334964	12465	34880	32592	42220	44660	62375	34850	44120	30970			32480	35195	33525	34629	49468	33704	35986	30784			0.112	-0.122	0.238	0.423	0.768	-0.003	0.278	-0.157			0.01	-0.012	-0.094	0.056	0.434	-0.051	-0.016	-0.166
Cct6a	13.6%	TCPZ_MOUSE	5	6	T-complex protein 1 subunit zeta OS=Mus musculus GN=Cct6a PE=1 SV=3	69424	P80317	NP_033968	12466	36165	36385	34900	49610	71395	29445	43300	27680			33676	39291	27711	38467	56623	28477	35317	27514			0.056	-0.058	0.026	0.23	0.893	-0.129	0.261	-0.319			-0.047	0.053	-0.306	-0.137	0.558	-0.177	-0.033	-0.327
Cct7	11.9%	TCPH_MOUSE	4	5	T-complex protein 1 subunit eta OS=Mus musculus GN=Cct7 PE=1 SV=1	69981	P80313	NP_031664	12468	66038	59510	74180	76895	112285	65005	87502	55518			61492	64262	58902	59624	89052	62869	71369	55185			0.071	-0.08	0.133	0.19	0.812	-0.071	0.318	-0.434			-0.032	0.031	-0.2	-0.177	0.478	-0.12	0.024	-0.443
Cct8	9.9%	TCPQ_MOUSE	4	6	T-complex protein 1 subunit theta OS=Mus musculus GN=Cct8 PE=1 SV=3	70171	P42932	NP_033970	12469	80560	69548	79382	80555	130325	65840	100128	52268			75016	75103	63033	62462	103359	63678	81666	51954			0.082	-0.086	0.068	0.216	0.782	-0.022	0.5	-0.387			-0.022	0.024	-0.265	-0.152	0.448	-0.07	0.206	-0.395
Cdc37	1.8%	CDC37_MOUSE	1	1	Hsp90 co-chaperone Cdc37 OS=Mus musculus GN=Cdc37 PE=1 SV=1	54703	Q61081	NP_058022	12539	46720	43060	55610	59860	44780	47230	56340	36760			43505	46499	44157	46415	35514	45679	45952	36539			0.058	-0.06	0.309	0.415	-0.004	0.073	0.328	-0.288			-0.045	0.051	-0.024	0.048	-0.338	0.025	0.034	-0.297
Cdc42	8.9%	CDC42_MOUSE	1	3	Cell division control protein 42 homolog OS=Mus musculus GN=Cdc42 PE=1 SV=2	25712	P60766	NP_001230698	12540	19640	15670	28710	27620	27070	19430	22060	31610			18289	16922	22796	21417	21469	18792	17993	31420			0.162	-0.183	0.676	0.625	0.828	0.018	0.201	0.788			0.059	-0.072	0.344	0.258	0.493	-0.03	-0.093	0.779
Cdh23	0.5%	CAD23_MOUSE	1	1	Cadherin-23 OS=Mus musculus GN=Cdh23 PE=1 SV=2	389100	Q99PF4	NP_075859	22295	21450	14950	41990	31180	49620	6878	10720	4370			19974	16144	33342	24177	39353	6652	8743	4344			0.237	-0.284	1.206	0.777	1.447	-1.404	-0.764	-2.058			0.134	-0.173	0.873	0.41	1.113	-1.452	-1.058	-2.067
Cdsn	1.6%	CDSN_MOUSE	1	2	Corneodesmosin OS=Mus musculus GN=Cdsn PE=2 SV=2	59203	Q7TPC1	NP_001008424	386463	102875	94140	154100	72650	127550	97690	128600	61095			95796	101658	122362	56333	101158	94481	104889	60728			0.062	-0.065	0.646	-0.439	0.372	-0.017	0.385	-0.692			-0.041	0.046	0.313	-0.806	0.038	-0.065	0.091	-0.701
CF132_MOUSE	1.2%	CF132_MOUSE	1	2	Uncharacterized protein C6orf132 homolog OS=Mus musculus PE=1 SV=2	141781	Q91Z58	NP_663464	224833	12610	9411	22340	12530	14520	15130	23390	11700			11742	10162	17740	9716	11516	14633	19078	11630			0.024	-0.05	0.81	0.363	0.257	0.313	0.914	-0.069			-0.079	0.06	0.477	-0.004	-0.078	0.265	0.62	-0.077
Cfl1	64.5%	COF1_MOUSE	8	18	Cofilin-1 OS=Mus musculus GN=Cfl1 PE=1 SV=3	24734	P18760	NP_031713	12631	144612	106075	162050	181425	164000	172575	186025	152025			134661	114547	128675	140676	130066	166906	151727	151113			0.11	-0.119	0.234	0.4	0.296	0.376	0.566	0.127			0.006	-0.008	-0.098	0.033	-0.037	0.328	0.272	0.119
Chil3	7.3%	CHIL3_MOUSE	2	2	Chitinase-like protein 3 OS=Mus musculus GN=Chil3 PE=1 SV=2	50960	O35744	NP_034022	12655	20010	16400	23015	24075	20370	21785	22455	30170			18632	17710	18274	18668	16156	21070	18315	29988			0.136	-0.151	0.338	0.402	0.162	0.246	0.295	0.727			0.033	-0.04	0.005	0.036	-0.173	0.198	0.001	0.719
Chuk	18.9%	IKKA_MOUSE	10	15	Inhibitor of nuclear factor kappa-B kinase subunit alpha OS=Mus musculus GN=Chuk PE=1 SV=1	97731	Q60680			97280	78920	124620	135332	113050	82885	87160	66585			90586	85223	98954	104937	89658	80162	71090	66186			0.082	-0.087	0.593	0.609	0.185	-0.052	0.154	-0.308			-0.021	0.024	0.26	0.242	-0.149	-0.1	-0.14	-0.317
Clic1	11.2%	CLIC1_MOUSE	1	1	Chloride intracellular channel protein 1 OS=Mus musculus GN=Clic1 PE=1 SV=3	31463	Q9Z1Q5	NP_254279	114584	36240	21060	33850	39060	34150	30150	29090	20950			33746	22742	26879	30287	27084	29159	23726	20824			0.339	-0.444	0.241	0.447	0.253	0.074	0.022	-0.452			0.236	-0.333	-0.092	0.08	-0.081	0.025	-0.272	-0.46
Clic4	4.7%	CLIC4_MOUSE	1	1	Chloride intracellular channel protein 4 OS=Mus musculus GN=Clic4 PE=1 SV=3	34668	Q9QYB1	NP_038913	29876	34540	30020	33330	33860	38080	35730	39880	34090			32163	32417	26465	26254	30200	34556	32528	33885			0.098	-0.105	0.046	0.069	0.238	0.146	0.305	0.079			-0.005	0.006	-0.287	-0.298	-0.096	0.098	0.011	0.07
Cltc	5%	CLH1_MOUSE	6	7	Clathrin heavy chain 1 OS=Mus musculus GN=Cltc PE=1 SV=3	215660	Q68FD5	NP_001003908	67300	33265	27165	39450	52570	41485	26520	31660	21970			30977	29335	31324	40763	32901	25649	25823	21838			0.166	-0.192	0.628	0.84	0.642	-0.137	0.25	-0.28			0.064	-0.08	0.295	0.472	0.307	-0.185	-0.043	-0.289
CN166_MOUSE	13.1%	CN166_MOUSE	2	3	UPF0568 protein C14orf166 homolog OS=Mus musculus PE=1 SV=1	33061				43458	34395	36890	43795	59018	38985	43315	43438			40467	37143	29292	33959	46806	37704	35330	43177			0.141	-0.16	-0.042	0.194	0.633	-0.004	0.222	0.252			0.039	-0.048	-0.374	-0.173	0.299	-0.052	-0.072	0.243
Cndp2	31.6%	CNDP2_MOUSE	10	16	Cytosolic non-specific dipeptidase OS=Mus musculus GN=Cndp2 PE=1 SV=1	61898	Q9D1A2	NP_001276460	66054	60325	50665	80990	94195	54298	92965	96015	65968			56173	54711	64310	73038	43062	89911	78312	65572			0.127	-0.139	0.176	0.562	-0.383	0.567	0.553	-0.118			0.024	-0.028	-0.157	0.195	-0.718	0.519	0.259	-0.127
Col1a1	15.3%	CO1A1_MOUSE	19	46	Collagen alpha-1(I) chain OS=Mus musculus GN=Col1a1 PE=1 SV=4	151807	P11087	NP_031768	12842	122470	106665	117635	136155	128245	126700	114765	130800			114042	115184	93407	105573	101710	122538	93605	130015			0.062	-0.065	-0.117	0.05	0.104	0.168	0.036	0.172			-0.041	0.046	-0.45	-0.317	-0.231	0.12	-0.258	0.163
Col1a2	3.5%	CO1A2_MOUSE	5	6	Collagen alpha-2(I) chain OS=Mus musculus GN=Col1a2 PE=1 SV=2	141220	Q01149	NP_031769	12843	229300	212600	170800	203100	194600	286800	219200	259400			213521	229578	135622	157482	154335	277380	178785	257843			0.054	-0.056	-0.199	-0.05	-0.12	0.28	0	0.231			-0.049	0.055	-0.532	-0.417	-0.455	0.232	-0.294	0.223
Col27a1	1.1%	CORA1_MOUSE	1	2	Collagen alpha-1(XXVII) chain OS=Mus musculus GN=Col27a1 PE=2 SV=1	208600	Q5QNQ9	NP_079961	373864	19180	12465	18940	16725	21055	17470	23140	15605			17860	13461	15039	12969	16699	16897	18874	15511			0.279	-0.35	0.255	0.079	0.406	0.121	0.55	-0.02			0.177	-0.239	-0.078	-0.288	0.072	0.073	0.256	-0.028
Col2a1	2.7%	CO2A1_MOUSE	2	5	Collagen alpha-1(II) chain OS=Mus musculus GN=Col2a1 PE=1 SV=2	158094	P28481	NP_001106987	12824	119160	117165	128895	135625	125635	118110	125955	170060			110960	126522	102348	105162	99639	114231	102732	169039			0.032	-0.034	0.139	0.045	0.01	-0.036	-0.014	-0.023			-0.071	0.078	-0.194	-0.322	-0.325	-0.084	-0.308	-0.031
Col3a1	7.2%	CO3A1_MOUSE	5	12	Collagen alpha-1(III) chain OS=Mus musculus GN=Col3a1 PE=1 SV=4	154320	P08121	NP_034060	12825	74770	67055	90685	88800	81885	74765	75265	82130			69625	72410	72008	68854	64942	72309	61388	81637			0.105	-0.113	0.248	0.202	0.249	0.084	0.056	-0.017			0.002	-0.002	-0.085	-0.165	-0.085	0.036	-0.238	-0.026
Col4a3	0.5%	CO4A3_MOUSE	1	1	Collagen alpha-3(IV) chain OS=Mus musculus GN=Col4a3 PE=1 SV=2	187340	Q9QZS0	NP_031760	12828	67610	56470	52430	55610	67070	62610	61520	70070			62957	60980	41632	43120	53193	60554	50177	69650			0.124	-0.136	-0.243	-0.158	0.112	0.013	-0.012	0.176			0.021	-0.025	-0.576	-0.525	-0.222	-0.035	-0.306	0.167
Col7a1	0.4%	CO7A1_MOUSE	1	2	Collagen alpha-1(VII) chain OS=Mus musculus GN=Col7a1 PE=1 SV=3	321288	Q63870	NP_031764	12836	9872	11965	14270	10012	9754	10865	12990	10078			9192	12920	11330	7762	7736	10509	10595	10017			-0.149	0.134	0.393	-0.144	-0.155	-0.003	0.254	-0.108			-0.251	0.245	0.061	-0.511	-0.489	-0.051	-0.04	-0.116
Copb2	2.1%	COPB2_MOUSE	1	1	Coatomer subunit beta~ OS=Mus musculus GN=Copb2 PE=1 SV=2	116073	O55029	NP_056642	50797	31710	20250	36920	39810	36300	28750	37810	30610			29528	21868	29317	30867	28789	27805	30839	30425			0.288	-0.359	0.507	0.616	0.483	0.146	0.541	0.237			0.185	-0.249	0.174	0.249	0.148	0.098	0.247	0.228
Copg1	1.7%	COPG1_MOUSE	1	2	Coatomer subunit gamma-1 OS=Mus musculus GN=Copg1 PE=1 SV=1	111309	Q9QZE5	NP_059505	54161	15575	9780	25075	19425	26145	19885	27450	16735			14504	10561	19911	15062	20735	19232	22389	16634			0.296	-0.374	0.984	0.615	1.039	0.642	1.115	0.399			0.194	-0.264	0.651	0.248	0.705	0.594	0.821	0.391
Coro1a	36.4%	COR1A_MOUSE	12	24	Coronin-1A OS=Mus musculus GN=Coro1a PE=1 SV=5	56912	O89053	NP_001288303	12721	91050	82925	77918	105900	58975	122250	101470	117100			84784	89549	61869	82114	46772	118234	82761	116396			0.068	-0.072	-0.26	0.238	-0.485	0.565	0.178	0.326			-0.034	0.039	-0.592	-0.128	-0.819	0.516	-0.115	0.317
Coro1b	2.7%	COR1B_MOUSE	1	3	Coronin-1B OS=Mus musculus GN=Coro1b PE=1 SV=1	59776	Q9WUM3	NP_035908	23789	85560	78860	80380	88780	121700	85970	102200	85920			79673	85157	63826	68840	96519	83146	83357	85404			0.036	-0.037	0.01	0	0.566	0.025	0.314	-0.005			-0.067	0.074	-0.323	-0.367	0.231	-0.024	0.02	-0.014
Coro1c	31%	COR1C_MOUSE	10	14	Coronin-1C OS=Mus musculus GN=Coro1c PE=1 SV=2	62250	Q9WUM4	NP_035909	23790	80570	66315	77015	73530	208700	47450	47140	33853			75026	71611	61153	57014	165517	45892	38449	33649			0.088	-0.093	0.048	0.062	1.645	-0.566	-0.62	-1.24			-0.016	0.018	-0.285	-0.304	1.31	-0.614	-0.914	-1.25
Cox5a	20.5%	COX5A_MOUSE	1	1	Cytochrome c oxidase subunit 5A, mitochondrial OS=Mus musculus GN=Cox5a PE=1 SV=2	18153	P12787	NP_031773	12858	35520	33180	58960	44800	64150	45680	55010	52370			33076	35829	46816	34737	50876	44180	44868	52056			0.048	-0.05	0.779	0.383	0.901	0.411	0.679	0.608			-0.055	0.061	0.447	0.016	0.567	0.363	0.385	0.6
Cox5b	7%	COX5B_MOUSE	1	1	Cytochrome c oxidase subunit 5B, mitochondrial OS=Mus musculus GN=Cox5b PE=1 SV=1	15693	P19536			49520	44960	41480	40700	53960	45400	46330	66820			46112	48551	32937	31558	42795	43909	37788	66419			0.068	-0.071	-0.188	-0.215	0.192	-0.057	-0.028	0.5			-0.035	0.039	-0.52	-0.582	-0.143	-0.106	-0.322	0.492
Cox7c	14.3%	COX7C_MOUSE	1	1	Cytochrome c oxidase subunit 7C, mitochondrial OS=Mus musculus GN=Cox7c PE=1 SV=1	8474	P17665	NP_031775	12867	55920	47540	46280	37080	56910	47840	60090	55080			52072	51337	36749	28751	45135	46268	49011	54749			0.112	-0.122	-0.161	-0.48	0.138	-0.113	0.216	0.091			0.01	-0.011	-0.493	-0.847	-0.197	-0.161	-0.078	0.082
Cpsf6	4.5%	CPSF6_MOUSE	1	2	Cleavage and polyadenylation specificity factor subunit 6 OS=Mus musculus GN=Cpsf6 PE=1 SV=1	63183	Q6NVF9	NP_001013409	432508	11460	8924	17340	19200	19645	15745	19695	21260			10671	9637	13769	14888	15580	15228	16063	21132			0.168	-0.196	0.766	0.913	0.947	0.61	0.95	1.058			0.065	-0.085	0.433	0.546	0.612	0.562	0.656	1.049
Crip1	10.4%	CRIP1_MOUSE	1	1	Cysteine-rich protein 1 OS=Mus musculus GN=Crip1 PE=1 SV=2	11464	P63254	NP_031789	12925	81270	114400	89610	91900	69150	184400	126700	116600			75678	123536	71153	71259	54842	178343	103340	115900			-0.268	0.226	-0.127	-0.09	-0.501	0.914	0.373	0.253			-0.37	0.337	-0.459	-0.457	-0.835	0.866	0.079	0.244
Csnk2a1	2.8%	CSK21_MOUSE	1	1	Casein kinase II subunit alpha OS=Mus musculus GN=Csnk2a1 PE=1 SV=2	50719	Q60737	NP_031814	12995	8847	9337	10100	8109	18060	9317	8431	6674			8239	10083	8020	6287	14323	9011	6877	6634			-0.039	0.038	0.152	-0.165	0.99	0.035	-0.109	-0.446			-0.142	0.149	-0.181	-0.532	0.656	-0.013	-0.403	-0.455
Cstb	66.3%	CYTB_MOUSE	5	12	Cystatin-B OS=Mus musculus GN=Cstb PE=1 SV=1	13444	Q62426	NP_031819	13014	146400	132300	166700	222500	129700	119750	152550	149100			136326	142865	132367	172525	102863	115816	124424	148204			0.083	-0.088	0.293	0.438	0.184	-0.223	0.161	-0.052			-0.02	0.023	-0.04	0.071	-0.151	-0.272	-0.133	-0.06
Ctsb	27.4%	CATB_MOUSE	7	13	Cathepsin B OS=Mus musculus GN=Ctsb PE=1 SV=2	41835	P10605	NP_031824	13030	36120	30170	32240	31100	41070	71180	35880	24940			33634	32580	25600	24115	32572	68843	29264	24790			0.084	-0.089	-0.04	0.203	-0.117	0.954	0.127	-0.241			-0.019	0.021	-0.373	-0.164	-0.452	0.906	-0.167	-0.25
Ctsc	8.2%	CATC_MOUSE	3	5	Dipeptidyl peptidase 1 OS=Mus musculus GN=Ctsc PE=1 SV=1	57953	P97821	NP_034112	13032	71925	63820	64830	79820	53470	96030	163180	48425			66975	68916	51479	61892	42406	92876	133093	48134			0.068	-0.072	-0.404	0.24	-1.271	0.498	1.322	-0.762			-0.035	0.039	-0.737	-0.127	-1.605	0.45	1.028	-0.77
Cybb	2.3%	CY24B_MOUSE	1	1	Cytochrome b-245 heavy chain OS=Mus musculus GN=Cybb PE=1 SV=1	74654	Q61093	NP_031833	13058	115800	102200	124800	188400	79200	98760	127000	83890			107832	110361	99097	146084	62812	95517	103584	83386			0.087	-0.093	0.195	0.789	-0.461	-0.142	0.221	-0.378			-0.016	0.018	-0.137	0.422	-0.795	-0.191	-0.074	-0.386
Cyfip1	3.4%	CYFP1_MOUSE	3	4	Cytoplasmic FMR1-interacting protein 1 OS=Mus musculus GN=Cyfip1 PE=1 SV=1	163530	Q7TMB8	NP_001158133	20430	12750	7446	15270	21840	16190	20930	22810	21650			11872	8041	12125	16934	12840	20243	18604	21520			0.329	-0.427	0.549	0.45	0.414	0.239	0.759	0.339			0.226	-0.316	0.216	0.083	0.079	0.191	0.465	0.33
D10Jhu81e	35%	ES1_MOUSE	4	4	ES1 protein homolog, mitochondrial OS=Mus musculus GN=D10Jhu81e PE=1 SV=1	32998				71405	64095	69350	85815	56660	88795	102800	60480			66492	69214	55066	66541	44936	85878	83846	60117			0.04	-0.041	0.015	0.298	-0.152	0.314	0.596	-0.008			-0.064	0.07	-0.318	-0.069	-0.487	0.265	0.302	-0.017
Dbnl	4.6%	DBNL_MOUSE	1	3	Drebrin-like protein OS=Mus musculus GN=Dbnl PE=1 SV=2	53538	Q62418	NP_001139780	13169	30660	23850	32750	36730	29690	32020	31630	37430			28549	25755	26005	28480	23547	30968	25798	37205			0.169	-0.192	0.266	0.431	0.286	0.36	0.293	0.47			0.067	-0.081	-0.067	0.064	-0.048	0.312	-0.001	0.461
Dbt	38%	ODB2_MOUSE	11	16	Lipoamide acyltransferase component of branched-chain alpha-keto acid dehydrogenase complex, mitochondrial OS=Mus musculus GN=Dbt PE=1 SV=2	62034	P53395	NP_034152	13171	58100	43260	65920	120200	42290	67270	94390	51000			54102	46715	52344	93202	33539	65061	76987	50694			0.181	-0.207	0.043	1.212	-1.046	0.131	0.535	-0.458			0.078	-0.096	-0.29	0.845	-1.38	0.083	0.241	-0.466
Dctn2	4.7%	DCTN2_MOUSE	1	1	Dynactin subunit 2 OS=Mus musculus GN=Dctn2 PE=1 SV=3	51766	Q99KJ8	NP_081427	69654	23970	18670	26480	25510	22640	28360	37520	18350			22321	20160	21026	19781	17955	27429	30602	18240			0.169	-0.191	0.313	0.259	0.087	0.412	0.815	-0.216			0.066	-0.081	-0.02	-0.108	-0.248	0.363	0.521	-0.225
Ddx3x	7.4%	DDX3X_MOUSE	3	3	ATP-dependent RNA helicase DDX3X OS=Mus musculus GN=Ddx3x PE=1 SV=3	81018	Q62167	NP_034158	13205	12780	9104	16310	19920	20540	15070	18130	14540			11900	9831	12951	15446	16291	14575	14787	14452			0.224	-0.265	0.576	0.674	0.782	0.463	0.397	0.41			0.121	-0.154	0.243	0.307	0.448	0.415	0.103	0.401
Ddx58	4.4%	DDX58_MOUSE	2	3	Probable ATP-dependent RNA helicase DDX58 OS=Mus musculus GN=Ddx58 PE=1 SV=2	126125	Q6Q899	NP_766277	230073	13635	11094	22718	26755	16972	15206	20910	12672			12697	11981	18039	20746	13460	14707	17056	12596			0.15	-0.17	0.792	1.029	0.411	0.267	0.698	-0.015			0.048	-0.059	0.46	0.662	0.077	0.219	0.404	-0.024
Dnaja3	3.3%	DNJA3_MOUSE	1	1	DnaJ homolog subfamily A member 3, mitochondrial OS=Mus musculus GN=Dnaja3 PE=1 SV=1	60886	Q99M87	NP_001128584	83945	12560	13450	21890	15770	26590	9246	15530	11150			11696	14524	17382	12229	21088	8943	12667	11084			-0.05	0.049	0.751	0.278	1.032	-0.492	0.256	-0.222			-0.153	0.159	0.418	-0.089	0.697	-0.54	-0.038	-0.231
Dnm1l	2.6%	DNM1L_MOUSE	1	1	Dynamin-1-like protein OS=Mus musculus GN=Dnm1l PE=1 SV=2	93890	Q8K1M6	NP_001021118	74006	32740	21790	36990	38210	37140	33730	43810	43650			30487	23531	29372	29628	29455	32622	35733	43388			0.264	-0.323	0.44	0.487	0.446	0.307	0.684	0.679			0.161	-0.213	0.107	0.12	0.111	0.259	0.39	0.67
Dock11	0.7%	DOC11_MOUSE	1	1	Dedicator of cytokinesis protein 11 OS=Mus musculus GN=Dock11 PE=1 SV=1	278283	A2AF47	NP_001009947	75974	8945	2500	13830	6658	9996	9843	10830	5936			8329	2700	10982	5162	7928	9519	8833	5900			0.644	-1.195	1.273	0.218	0.805	0.782	0.92	0.053			0.542	-1.084	0.94	-0.149	0.47	0.734	0.626	0.044
Dpp9	2.4%	DPP9_MOUSE	1	1	Dipeptidyl peptidase 9 OS=Mus musculus GN=Dpp9 PE=1 SV=2	109278	Q8BVG4	NP_766212	224897	8875	4910	13430	11670	13660	11440	11460	9246			8265	5303	10664	9048	10833	11065	9348	9190			0.365	-0.489	0.962	0.76	0.987	0.731	0.734	0.424			0.262	-0.378	0.63	0.393	0.652	0.683	0.439	0.415
Dpysl2	20.6%	DPYL2_MOUSE	8	9	Dihydropyrimidinase-related protein 2 OS=Mus musculus GN=Dpysl2 PE=1 SV=2	70200	O08553	NP_034085	12934	94480	71610	85835	95200	80620	88745	91085	64345			87978	77328	68157	73817	63939	85830	74291	63959			0.099	-0.107	0.127	0.328	-0.061	0.349	0.338	-0.109			-0.004	0.004	-0.206	-0.039	-0.395	0.3	0.044	-0.117
Dsp	4.5%	DESP_MOUSE	11	22	Desmoplakin OS=Mus musculus GN=Dsp PE=1 SV=1	391761	E9Q557	NP_076331	109620	70400	65940	113200	50530	75000	73650	138600	43570			65555	71206	89886	39181	59482	71231	113047	43309			0.115	-0.127	0.46	-0.428	0.125	0.149	0.708	-0.541			0.013	-0.016	0.127	-0.795	-0.21	0.1	0.414	-0.55
Dstn	21.2%	DEST_MOUSE	3	4	Destrin OS=Mus musculus GN=Dstn PE=1 SV=3	23893	Q9R0P5	NP_062745	56431	148900	147600	123000	136100	162400	158500	157000	257800			138654	159387	97667	105531	128797	153294	128053	256252			0.094	-0.101	-0.175	-0.151	0.104	0.069	0.055	0.58			-0.009	0.01	-0.508	-0.518	-0.23	0.021	-0.239	0.572
Dync1h1	2.1%	DYHC1_MOUSE	5	6	Cytoplasmic dynein 1 heavy chain 1 OS=Mus musculus GN=Dync1h1 PE=1 SV=2	602737	Q9JHU4	NP_084514	13424	26545	18610	27860	36175	42120	24665	26330	23280			24718	20097	22122	28051	33405	23855	21476	23140			0.252	-0.305	0.813	0.827	0.9	0.564	0.697	0.156			0.149	-0.194	0.48	0.46	0.566	0.516	0.403	0.148
Dynll1	24.7%	DYL1_MOUSE	1	1	Dynein light chain 1, cytoplasmic OS=Mus musculus GN=Dynll1 PE=1 SV=1	13051	P63168	NP_062656	56455	103800	96500	104600	105200	189600	79740	105700	115000			96658	104207	83057	81571	150369	77121	86212	114309			0.052	-0.054	0.063	0.071	0.921	-0.329	0.078	0.199			-0.051	0.057	-0.27	-0.296	0.586	-0.377	-0.216	0.191
Echs1	15.2%	ECHM_MOUSE	3	4	Enoyl-CoA hydratase, mitochondrial OS=Mus musculus GN=Echs1 PE=1 SV=1	37124	Q8BH95	NP_444349	93747	71630	67680	63080	66250	78020	71360	79820	89480			66700	73085	50088	51370	61877	69016	65103	88942			0.09	-0.097	0.428	0.17	0.164	0.035	0.197	0.361			-0.012	0.014	0.096	-0.197	-0.171	-0.013	-0.097	0.353
Eea1	2.1%	EEA1_MOUSE	1	1	Early endosome antigen 1 OS=Mus musculus GN=Eea1 PE=1 SV=2	200457	Q8BL66	NP_001001932	216238	17650	15320	28050	36800	25710	28040	24780	25170			16435	16543	22273	28535	20391	27120	20211	25020			0.099	-0.106	0.767	1.159	0.641	0.766	0.588	0.611			-0.004	0.005	0.434	0.792	0.307	0.718	0.294	0.602
Eef1a1	47.6%	EF1A1_MOUSE	15	40	Elongation factor 1-alpha 1 OS=Mus musculus GN=Eef1a1 PE=1 SV=3	61424	P10126	NP_034236	13627	82275	69780	110400	124250	75670	95190	76450	79260			76613	75352	87663	96343	60013	92063	62354	78784			0.118	-0.129	0.413	0.588	0.042	0.163	0.193	0.109			0.015	-0.018	0.08	0.221	-0.292	0.115	-0.101	0.1
Eef1b	16.4%	EF1B_MOUSE	3	4	Elongation factor 1-beta OS=Mus musculus GN=Eef1b PE=1 SV=5	30349	O70251	NP_061266	55949	88270	73530	75535	84970	93070	82170	98220	85980			82195	79402	59977	65885	73812	79471	80112	85464			0.101	-0.111	-0.124	0.11	0.302	-0.004	0.314	0.087			-0.002	0	-0.456	-0.257	-0.033	-0.052	0.02	0.078
Eef1d	2.5%	EF1D_MOUSE	1	1	Elongation factor 1-delta OS=Mus musculus GN=Eef1d PE=1 SV=3	36430	P57776	NP_001272358	66656	41590	35080	33350	39880	53600	40360	42750	44870			38728	37881	26481	30922	42510	39035	34868	44600			0.118	-0.128	-0.201	0.057	0.484	0.074	0.157	0.227			0.015	-0.017	-0.534	-0.31	0.149	0.026	-0.137	0.218
Eef1g	13%	EF1G_MOUSE	4	5	Elongation factor 1-gamma OS=Mus musculus GN=Eef1g PE=1 SV=3	58163	Q9D8N0	NP_080283	67160	61535	53935	63815	74845	63055	56690	80605	76090			57300	58242	50672	58035	50008	54829	65744	75633			0.073	-0.078	0.075	0.288	-0.136	-0.049	0.226	0.378			-0.03	0.034	-0.258	-0.078	-0.471	-0.097	-0.068	0.368
Eef2	37.6%	EF2_MOUSE	20	33	Elongation factor 2 OS=Mus musculus GN=Eef2 PE=1 SV=2	111118	P58252	NP_031933	13629	45165	44048	55392	57382	49592	52315	55720	59855			42057	47565	43984	44494	39331	50597	45447	59496			0.077	-0.082	0.292	0.488	0.252	0.042	0.246	0.408			-0.026	0.029	-0.04	0.122	-0.082	-0.006	-0.048	0.399
Ehd1	24.5%	EHD1_MOUSE	7	13	EH domain-containing protein 1 OS=Mus musculus GN=Ehd1 PE=1 SV=1	70934	Q9WVK4	NP_034249	13660	45900	38700	51290	61825	55215	46220	56800	47450			42742	41791	40726	47939	43790	44702	46328	47165			0.117	-0.129	0.514	0.547	0.531	-0.38	0.243	-0.002			0.014	-0.018	0.181	0.18	0.197	-0.428	-0.051	-0.011
Eif2s2	2.7%	IF2B_MOUSE	1	1	Eukaryotic translation initiation factor 2 subunit 2 OS=Mus musculus GN=Eif2s2 PE=1 SV=1	49410	Q99L45	NP_080306	67204	34970	29930	39230	36200	37590	32450	31620	28710			32564	32320	31150	28069	29812	31385	25790	28538			0.108	-0.117	0.274	0.158	0.212	0	-0.037	-0.177			0.005	-0.006	-0.059	-0.209	-0.122	-0.048	-0.331	-0.185
Eif3a	0.5%	EIF3A_MOUSE	1	1	Eukaryotic translation initiation factor 3 subunit A OS=Mus musculus GN=Eif3a PE=1 SV=5	182404	P23116	NP_034253	13669	44690	38420	44140	48500	56040	42010	44940	52520			41615	41489	35049	37607	44444	40631	36655	52205			0.105	-0.113	0.087	0.223	0.431	0.016	0.113	0.338			0.002	-0.002	-0.246	-0.144	0.097	-0.032	-0.181	0.329
Eif4a1	8.9%	IF4A1_MOUSE	2	2	Eukaryotic initiation factor 4A-I OS=Mus musculus GN=Eif4a1 PE=1 SV=1	51165	P60843	NP_659207	13681	66975	47890	82425	75030	86965	59465	60795	44480			62366	51714	65448	58178	68971	57511	49586	44213			0.254	-0.311	0.838	0.718	0.842	0.444	0.438	-0.051			0.152	-0.2	0.506	0.35	0.507	0.395	0.144	-0.06
Eif5a	22.7%	IF5A1_MOUSE	2	2	Eukaryotic translation initiation factor 5A-1 OS=Mus musculus GN=Eif5a PE=1 SV=2	20258	P63242	NP_001160061	276770	48125	42315	66525	57485	62250	44970	56630	39440			44812	45694	52823	44574	49370	43493	46189	39203			0.15	-0.18	0.681	0.446	0.667	0.167	0.52	-0.026			0.048	-0.068	0.348	0.078	0.332	0.118	0.226	-0.035
Eif6	9.8%	IF6_MOUSE	1	1	Eukaryotic translation initiation factor 6 OS=Mus musculus GN=Eif6 PE=1 SV=2	28382	O55135	NP_034709	16418	35130	27290	48230	47190	45190	37360	40600	29500			32712	29469	38298	36590	35841	36133	33114	29323			0.171	-0.194	0.628	0.596	0.534	0.259	0.379	-0.081			0.068	-0.083	0.295	0.229	0.2	0.211	0.085	-0.09
Elmo1	2.5%	ELMO1_MOUSE	1	1	Engulfment and cell motility protein 1 OS=Mus musculus GN=Elmo1 PE=1 SV=2	96769	Q8BPU7	NP_525027	140580	22420	18330	29660	32420	22720	23760	36010	24610			20878	19794	23552	25138	18019	22979	29371	24462			0.138	-0.153	0.542	0.67	0.157	0.222	0.822	0.272			0.035	-0.042	0.209	0.303	-0.177	0.174	0.528	0.264
Elob	32.2%	ELOB_MOUSE	2	2	Transcription elongation factor B polypeptide 2 OS=Mus musculus GN=Tceb2 PE=1 SV=1	15052	P62869	NP_080581	67673	64725	59255	85335	85140	66805	59955	78420	52465			60271	63986	67760	66017	52982	57986	63962	52150			0.075	-0.08	0.445	0.477	0.152	-0.1	0.24	-0.3			-0.028	0.031	0.113	0.11	-0.182	-0.148	-0.054	-0.308
Eno1	61.8%	ENOA_MOUSE	19	62	Alpha-enolase OS=Mus musculus GN=Eno1 PE=1 SV=3	55474	P17182	NP_001020559	13806	127300	102820	124600	145400	105800	140740	175620	142000			118539	111031	98937	112742	83909	136117	143240	141147			0.085	-0.09	0.13	0.418	-0.25	0.074	0.537	0.145			-0.018	0.021	-0.203	0.051	-0.585	0.026	0.243	0.136
Eprs	0.8%	SYEP_MOUSE	1	1	Bifunctional glutamate/proline--tRNA ligase OS=Mus musculus GN=Eprs PE=1 SV=4	204739	Q8CGC7	NP_084011	107508	21720	18900	26920	30250	17520	19340	21420	23400			20225	20410	21376	23456	13895	18705	17471	23259			0.097	-0.104	0.406	0.575	-0.213	-0.071	0.077	0.204			-0.006	0.007	0.074	0.208	-0.548	-0.119	-0.217	0.196
Esd	42.6%	ESTD_MOUSE	6	12	S-formylglutathione hydrolase OS=Mus musculus GN=Esd PE=1 SV=1	36453	Q9R0P3	NP_058599	13885	90620	68665	98530	137100	62348	86645	110700	47135			84384	74148	78236	106307	49447	83799	90290	46852			0.17	-0.195	0.496	0.892	0.158	0.19	0.586	-0.299			0.068	-0.084	0.163	0.524	-0.177	0.142	0.292	-0.308
Ezr	2.9%	EZRI_MOUSE	1	1	Ezrin OS=Mus musculus GN=Ezr PE=1 SV=3	82311	P26040	NP_033536	22350	12940	8485	22750	20040	37210	9324	9539	6834			12049	9162	18065	15539	29511	9017	7781	6793			0.273	-0.336	1.087	0.904	1.796	-0.2	-0.167	-0.648			0.17	-0.225	0.754	0.537	1.462	-0.248	-0.461	-0.657
Fam129a	1.8%	NIBAN_MOUSE	1	1	Protein Niban OS=Mus musculus GN=Fam129a PE=1 SV=2	116044	Q3UW53	NP_071301	63913	17100	14040	30320	32120	16130	26770	27430	22110			15923	15162	24075	24906	12792	25891	22373	21978			0.135	-0.149	0.962	1.045	0.051	0.782	0.817	0.506			0.032	-0.038	0.629	0.678	-0.283	0.734	0.523	0.497
Fam129b	2.9%	NIBL1_MOUSE	1	1	Niban-like protein 1 OS=Mus musculus GN=Fam129b PE=1 SV=2	95246	Q8R1F1	NP_666231	227737	72650	48380	97640	93690	82080	106500	119000	82730			67650	52244	77531	72647	65096	103002	97060	82233			0.264	-0.323	0.69	0.631	0.44	0.815	0.976	0.451			0.161	-0.212	0.357	0.264	0.105	0.767	0.682	0.442
Fam91a1	2.6%	F91A1_MOUSE	1	1	Protein FAM91A1 OS=Mus musculus GN=Fam91a1 PE=1 SV=1	104229	Q3UVG3	NP_666071	210998	33050	26070	36500	37060	113800	13830	17000	7039			30776	28152	28982	28736	90253	13375	13866	6997			0.161	-0.181	0.304	0.326	1.945	-1.096	-0.798	-2.07			0.058	-0.07	-0.028	-0.041	1.61	-1.144	-1.092	-2.079
Farsa	2.2%	SYFA_MOUSE	1	1	Phenylalanine--tRNA ligase alpha subunit OS=Mus musculus GN=Farsa PE=1 SV=1	65010	Q8C0C7	NP_079924	66590	3746	1086	2067	1474	3950	1867	4802	2357			3488	1173	1641	1143	3133	1805	3917	2342			0.633	-1.154	-0.225	-0.713	0.709	-0.372	0.991	-0.036			0.53	-1.043	-0.558	-1.08	0.375	-0.42	0.697	-0.044
Fasn	4.9%	FAS_MOUSE	8	10	Fatty acid synthase OS=Mus musculus GN=Fasn PE=1 SV=2	298598	P19096	NP_032014	14104	52140	43740	59202	65855	56215	61520	66485	56940			48552	47233	47009	51063	44583	59499	54227	56598			0.086	-0.092	0.221	0.34	0.129	0.28	0.354	0.198			-0.016	0.018	-0.112	-0.026	-0.205	0.231	0.06	0.19
Fau	18.6%	RS30_MOUSE	2	4	40S ribosomal protein S30 OS=Mus musculus GN=Fau PE=1 SV=1	9852	P62862			156768	125868	350825	249275	148135	44075	43160	29640			145980	135920	278570	193286	117484	42628	35202	29462			0.154	-0.174	1.338	0.857	0.062	-1.772	-1.822	-2.321			0.05	-0.063	1.006	0.49	-0.273	-1.82	-2.117	-2.33
Fcgr1	16.3%	FCGR1_MOUSE	5	8	High affinity immunoglobulin gamma Fc receptor I OS=Mus musculus GN=Fcgr1 PE=1 SV=1	48925	P26151	NP_034316	14129	90515	78685	105800	110950	65610	91065	132850	43270			84287	84969	84009	86031	52033	88074	108356	43010			0.098	-0.105	0.326	0.535	-0.767	0.16	0.771	-1.079			-0.005	0.005	-0.007	0.168	-1.101	0.112	0.477	-1.088
Fcgr3	8%	FCGR3_MOUSE	1	2	Low affinity immunoglobulin gamma Fc region receptor III OS=Mus musculus GN=Fcgr3 PE=1 SV=1	33511	P08508			8399	6932	13710	12520	17200	14935	15255	7114			7821	7486	10886	9708	13641	14444	12443	7071			0.133	-0.146	0.839	0.711	1.169	0.946	0.955	-0.106			0.03	-0.035	0.506	0.344	0.835	0.898	0.661	-0.114
Fgfr4	3%	FGFR4_MOUSE	1	1	Fibroblast growth factor receptor 4 OS=Mus musculus GN=Fgfr4 PE=1 SV=3	95476	Q03142	NP_032037	14186	27590	17500	49480	40280	49420	17150	18370	10560			25692	18898	39289	31233	39195	16587	14983	10496			0.291	-0.365	1.134	0.837	1.132	-0.395	-0.295	-1.094			0.188	-0.255	0.801	0.47	0.798	-0.443	-0.589	-1.103
Fkbp15	1.2%	FKB15_MOUSE	1	1	FK506-binding protein 15 OS=Mus musculus GN=Fkbp15 PE=1 SV=2	149490	Q6P9Q6	NP_001038993	338355	55610	50670	87770	82510	60140	46350	51360	35880			51783	54716	69693	63977	47696	44828	41891	35665			0.066	-0.069	0.724	0.635	0.179	-0.197	-0.049	-0.567			-0.037	0.042	0.391	0.268	-0.156	-0.245	-0.343	-0.575
Flii	16%	FLII_MOUSE	12	19	Protein flightless-1 homolog OS=Mus musculus GN=Flii PE=1 SV=1	164699	Q9JJ28	NP_071292	14248	26462	19715	38260	36865	58655	19515	23552	13770			24642	21289	30380	28585	46519	18873	19210	13687			0.15	-0.168	0.662	0.426	1.351	-0.275	-0.05	-0.684			0.048	-0.058	0.328	0.06	1.016	-0.324	-0.344	-0.692
Flna	36.2%	FLNA_MOUSE	57	95	Filamin-A OS=Mus musculus GN=Flna PE=1 SV=5	320792	Q8BTM8		192176	106750	92865	111800	128850	99295	108000	115200	99995			99404	100281	88774	99909	78750	104452	93960	99394			0.091	-0.098	0.158	0.326	0.058	0.181	0.243	0.053			-0.012	0.013	-0.175	-0.041	-0.277	0.133	-0.051	0.045
Ftl1	8.7%	FRIL1_MOUSE	1	3	Ferritin light chain 1 OS=Mus musculus GN=Ftl1 PE=1 SV=2	23138	P29391			69190	59150	67880	69110	90320	70330	59480	71830			64428	63874	53900	53587	71632	68020	48514	71398			0.173	-0.196	0.141	0.184	0.493	0.132	0.123	0.163			0.07	-0.086	-0.192	-0.183	0.159	0.084	-0.171	0.154
Fyttd1	4.4%	UIF_MOUSE	1	1	UAP56-interacting factor OS=Mus musculus GN=Fyttd1 PE=1 SV=1	42568	Q91Z49	NP_001152821	69823	43920	35690	63670	48250	44000	39690	44390	39120			40898	38540	50556	37413	34896	38387	36205	38885			0.142	-0.157	0.678	0.278	0.145	-0.004	0.157	-0.025			0.039	-0.047	0.345	-0.089	-0.19	-0.052	-0.137	-0.034
G6pdx	7.6%	G6PD1_MOUSE	3	7	Glucose-6-phosphate 1-dehydrogenase X OS=Mus musculus GN=G6pdx PE=1 SV=3	66327	Q00612	NP_032088	14381	55560	44550	56250	66290	73190	55780	72220	39170			51736	48107	44665	51401	58047	53948	58904	38935			0.151	-0.168	0.683	0.405	0.548	0.156	0.529	-0.354			0.048	-0.057	0.351	0.038	0.214	0.108	0.235	-0.362
Gapdh	54.7%	G3P_MOUSE	15	70	Glyceraldehyde-3-phosphate dehydrogenase OS=Mus musculus GN=Gapdh PE=1 SV=2	42260	P16858	NP_001276655	100042025	169160	145330	167900	202600	132665	155910	222100	136000			157519	156936	133320	157095	105216	150789	181151	135183			0.114	-0.124	0.194	0.598	-0.2	0.05	0.473	-0.137			0.012	-0.013	-0.139	0.231	-0.535	0.002	0.179	-0.146
Gars	4.5%	SYG_MOUSE	2	2	Glycine--tRNA ligase OS=Mus musculus GN=Gars PE=1 SV=1	94311				46025	29235	53835	48490	44515	30790	46350	47825			42858	31570	42747	37599	35304	29779	37805	47537			0.29	-0.363	0.495	0.372	0.235	-0.298	0.305	0.322			0.187	-0.252	0.162	0.004	-0.099	-0.346	0.011	0.314
Gclm	17.2%	GSH0_MOUSE	3	5	Glutamate--cysteine ligase regulatory subunit OS=Mus musculus GN=Gclm PE=1 SV=1	34753	O09172	NP_032155	14630	74735	58640	80390	63410	65100	64220	68790	42580			69592	63323	63833	49168	51630	62111	56107	42324			0.164	-0.186	0.265	0.196	0.255	-0.028	0.255	-0.277			0.061	-0.075	-0.067	-0.171	-0.079	-0.076	-0.039	-0.286
Gcn1	1.5%	GCN1_MOUSE	2	3	eIF-2-alpha kinase activator GCN1 OS=Mus musculus GN=Gcn1 PE=1 SV=1	331836	E9PVA8	NP_766307	231659	11291	8558	11579	12688	12588	10909	15997	16302			10513	9241	9195	9837	9983	10550	13048	16204			0.208	-0.672	0.254	0.029	-0.071	-0.029	0.529	0.535			0.104	-0.562	-0.08	-0.338	-0.406	-0.078	0.235	0.526
Gda	7.3%	GUAD_MOUSE	2	4	Guanine deaminase OS=Mus musculus GN=Gda PE=1 SV=1	57681	Q9R111	NP_034396	14544	72898	66555	61655	91985	60430	72382	120530	96315			67881	71870	48956	71325	47927	70005	98308	95737			0.088	-0.092	-0.049	0.516	-0.146	0.072	0.861	0.501			-0.015	0.019	-0.382	0.149	-0.48	0.024	0.567	0.492
Gdi2	11%	GDIB_MOUSE	3	3	Rab GDP dissociation inhibitor beta OS=Mus musculus GN=Gdi2 PE=1 SV=1	59726	Q61598	NP_032138	14569	11380	9507	12750	12690	9703	10220	11400	8959			10597	10267	10124	9839	7695	9884	9299	8905			0.102	-0.11	0.514	0.259	0.083	0.212	0.348	-0.025			-0.001	0.001	0.181	-0.108	-0.252	0.164	0.054	-0.034
Gid8	12.7%	GID8_MOUSE	2	3	Glucose-induced degradation protein 8 homolog OS=Mus musculus GN=Gid8 PE=1 SV=1	30944	Q9D7M1	NP_001276580	76425	160290	137195	191745	183960	161055	164900	155950	115495			149260	148151	152254	142642	127731	159483	127197	114802			0.163	-0.188	0.448	0.328	0.196	0.143	0.128	-0.446			0.06	-0.078	0.116	-0.038	-0.138	0.095	-0.166	-0.455
Glrx3	8.3%	GLRX3_MOUSE	1	5	Glutaredoxin-3 OS=Mus musculus GN=Glrx3 PE=1 SV=1	44914	Q9CQM9	NP_075629	30926	2698	1803	7661	5771	8625	4815	5925	4978			2513	1946	6083	4474	6840	4656	4832	4948			0	-0.866	1.41	1.16	1.64	0.851	1.197	0.668			-0.103	-0.756	1.078	0.793	1.306	0.803	0.903	0.66
Glul	20.4%	GLNA_MOUSE	5	6	Glutamine synthetase OS=Mus musculus GN=Glul PE=1 SV=6	47875	P15105	NP_032157	14645	70830	53560	57160	55440	54970	70420	112000	73690			65956	57838	45388	42988	43596	68106	91350	73248			0.137	-0.152	-0.482	-0.267	-0.553	0.264	0.886	0.245			0.034	-0.041	-0.815	-0.634	-0.888	0.216	0.592	0.236
Gnai2	26.5%	GNAI2_MOUSE	5	6	Guanine nucleotide-binding protein G(i) subunit alpha-2 OS=Mus musculus GN=Gnai2 PE=1 SV=5	47450	P08752	NP_032164	14678	60225	53410	67745	68900	75460	59420	78635	51100			56080	57675	53793	53425	59847	57468	64136	50794			0.109	-0.118	0.257	0.442	0.414	0.163	0.469	0.059			0.006	-0.007	-0.075	0.075	0.079	0.114	0.175	0.05
Gnas	2.4%	GNAS1_MOUSE	1	1	Guanine nucleotide-binding protein G(s) subunit alpha isoforms XLas OS=Mus musculus GN=Gnas PE=1 SV=1	130533	Q6R0H7	NP_001070975	14683	1726		1704	1502	2367	1168	1636	1710			1608		1353	1165	1878	1129	1334	1700			0		-0.019	-0.201	0.456	-0.563	-0.077	-0.013			-0.103		-0.351	-0.568	0.121	-0.612	-0.371	-0.022
Gpnmb	3.1%	GPNMB_MOUSE	1	1	Transmembrane glycoprotein NMB OS=Mus musculus GN=Gpnmb PE=1 SV=2	69933	Q99P91	NP_444340	93695	36320	25860	37570	58870	40570	39130	71110	45260			33821	27926	29832	45648	32176	37844	57999	44988			0.224	-0.266	0.273	0.921	0.384	0.332	1.194	0.542			0.121	-0.155	-0.06	0.554	0.05	0.284	0.9	0.533
Gpsm1	4.2%	GPSM1_MOUSE	1	1	G-protein-signaling modulator 1 OS=Mus musculus GN=Gpsm1 PE=1 SV=3	80615	Q6IR34	NP_001186075	67839	60720	38260	72180	87350	56110	54800	60930	64800			56542	41316	57314	67730	44499	53000	49696	64411			0.295	-0.371	0.544	0.82	0.181	0.147	0.3	0.389			0.192	-0.26	0.212	0.453	-0.153	0.099	0.006	0.38
Gpx4	7.1%	GPX41_MOUSE	1	1	Phospholipid hydroperoxide glutathione peroxidase, mitochondrial OS=Mus musculus GN=Gpx4 PE=1 SV=4	26452				88370	73700	98170	101100	92030	69050	82320	71270			82290	79586	77951	78392	72988	66782	67142	70843			0.125	-0.137	0.277	0.319	0.184	-0.231	0.023	-0.185			0.022	-0.026	-0.056	-0.048	-0.151	-0.279	-0.271	-0.194
Grn	2%	GRN_MOUSE	1	1	Granulins OS=Mus musculus GN=Grn PE=1 SV=2	75306	P28798			41670	32930	35720	28050	33810	39320	47530	32000			38802	35560	28364	21750	26814	38028	38766	31808			0.16	-0.18	-0.062	-0.411	-0.142	0.076	0.35	-0.221			0.057	-0.069	-0.395	-0.778	-0.476	0.028	0.056	-0.23
Gsdma	3.1%	GSDMA_MOUSE	1	1	Gasdermin-A OS=Mus musculus GN=Gsdma PE=2 SV=1	57639	Q9EST1	NP_067322	57911	78860	58180	99600	57160	85780	91600	130000	48370			73433	62826	79086	44321	68032	88591	106032	48080			0.203	-0.236	0.54	-0.262	0.324	0.419	0.924	-0.502			0.1	-0.125	0.207	-0.629	-0.01	0.371	0.63	-0.511
Gsn	20.5%	GELS_MOUSE	9	25	Gelsolin OS=Mus musculus GN=Gsn PE=1 SV=3	95912	P13020	NP_666232	227753	60160	58690	48285	44400	215900	41180	46820	34100			56020	63377	38340	34428	171227	39827	38188	33895			0.116	-0.127	-0.087	-0.424	1.685	-0.337	-0.32	-0.779			0.014	-0.016	-0.42	-0.791	1.35	-0.385	-0.614	-0.787
H2-D1	11.3%	HA11_MOUSE	3	3	H-2 class I histocompatibility antigen, D-B alpha chain OS=Mus musculus GN=H2-D1 PE=1 SV=2	44533	P01899	NP_034510	14964	61470	54010	77820	84360	67100	63050	74130	47920			57240	58324	61793	65412	53216	60980	60462	47633			0.122	-0.134	0.289	0.547	0.208	0.105	0.36	-0.269			0.019	-0.023	-0.043	0.18	-0.126	0.056	0.066	-0.278
H2-K1	6.5%	HA1B_MOUSE	2	2	H-2 class I histocompatibility antigen, K-B alpha chain OS=Mus musculus GN=H2-K1 PE=1 SV=1	45112	P01901	NP_001001892	14972	30395	27855	36400	43870	28890	26625	38265	23400			28303	30080	28904	34017	22911	25750	31210	23260			0.048	-0.05	0.272	0.61	0	-0.195	0.401	-0.279			-0.055	0.06	-0.06	0.244	-0.334	-0.244	0.106	-0.289
Hadha	6.6%	ECHA_MOUSE	3	6	Trifunctional enzyme subunit alpha, mitochondrial OS=Mus musculus GN=Hadha PE=1 SV=1	98656	Q8BMS1	NP_849209	97212	5752	5575	7998	6004	12256	9154	7528	6319			5357	6020	6351	4656	9721	8854	6140	6281			0.109	-0.257	0.59	0.427	1.441	0.663	0.771	0.19			0.006	-0.146	0.257	0.06	1.106	0.615	0.477	0.181
Hba	30.3%	HBA_MOUSE	3	4	Hemoglobin subunit alpha OS=Mus musculus GN=Hba PE=1 SV=2	17883	P01942			65870	54460	51225	48275	111200	61370	61085	81960			61337	58809	40675	37432	88192	59354	49823	81468			0.082	-0.086	-0.399	-0.318	0.952	0.095	-0.454	0.512			-0.021	0.024	-0.731	-0.685	0.618	0.047	-0.748	0.504
Hbb-b1	39.5%	HBB1_MOUSE	4	8	Hemoglobin subunit beta-1 OS=Mus musculus GN=Hbb-b1 PE=1 SV=2	18694	P02088	NP_001188320	100503605	72828	66440	56885	53775	138492	92045	49898	116962			67816	71746	45170	41697	109836	89021	40698	116260			0.075	-0.081	-0.244	-0.57	1.066	0.233	-0.384	0.737			-0.028	0.03	-0.577	-0.936	0.731	0.185	-0.678	0.728
Hist1h2af	14.6%	H2A1F_MOUSE	1	4	Histone H2A type 1-F OS=Mus musculus GN=Hist1h2af PE=1 SV=3	17361	Q8CGP5	NP_783592	319173	65505	46840	115395	60160	99955	59115	75600	26704			60998	50581	91629	46647	79273	57174	61661	26544			0.235	-0.28	1.031	0.095	1.075	-0.148	0.029	-1.535			0.132	-0.17	0.698	-0.272	0.74	-0.197	-0.265	-1.544
Hist1h2bb	26.2%	H2B1B_MOUSE	3	9	Histone H2B type 1-B OS=Mus musculus GN=Hist1h2bb PE=1 SV=3	18756	Q64475	NP_783595	319178	216500	224100	335600	243600	470800	158000	93540	84430			201602	241998	266481	188885	373385	152810	76294	83923			0.043	-0.044	0.607	0.145	1.096	0.176	-0.86	-1.384			-0.06	0.067	0.275	-0.222	0.761	0.128	-1.154	-1.392
Hist1h3a	6.6%	H31_MOUSE	1	1	Histone H3.1 OS=Mus musculus GN=Hist1h3a PE=1 SV=2	18717	P68433	NP_038578	319152	40600	26530	54530	37700	66050	25180	18300	11350			37806	28649	43299	29233	52384	24353	14926	11282			0.275	-0.339	0.7	0.168	0.977	-0.415	-0.875	-1.564			0.172	-0.228	0.367	-0.199	0.642	-0.463	-1.169	-1.573
Hist1h4a;	47.6%	H4_MOUSE	7	13	Histone H4 OS=Mus musculus GN=Hist1h4a PE=1 SV=2	14110	P62806	NP_001182350	100041230	124525	115300	203200	140200	228000	108800	66325	57195			115955	124508	161350	108711	180824	105226	54096	56851			0.079	-0.084	0.773	0.187	1.018	-0.211	-0.819	-1.116			-0.024	0.027	0.44	-0.18	0.683	-0.259	-1.113	-1.125
Hist2h2ab	17.7%	H2A2B_MOUSE	1	1	Histone H2A type 2-B OS=Mus musculus GN=Hist2h2ab PE=1 SV=3	17213	Q64522	NP_835585	621893	1656	2392	12620	6204	13080		3638	2218			1541	2583	10021	4810	10373		2967	2205			-0.29	0.241	2.64	1.616	2.692		0.846	0.132			-0.392	0.352	2.308	1.249	2.358		0.552	0.123
Hk2	8.7%	HXK2_MOUSE	4	4	Hexokinase-2 OS=Mus musculus GN=Hk2 PE=1 SV=1	116326	O08528	NP_038848	15277	24860	18665	39555	39180	36780	35770	27090	24875			23150	20155	31408	30380	29169	34595	22096	24726			0.164	-0.186	0.692	0.352	0.576	0.454	0.322	-0.136			0.062	-0.074	0.359	-0.015	0.241	0.406	0.028	-0.145
Hk3	28.2%	HXK3_MOUSE	15	29	Hexokinase-3 OS=Mus musculus GN=Hk3 PE=1 SV=2	106789	Q3TRM8	NP_001028417	212032	33930	30280	52580	57560	33965	37490	42050	26865			31595	32698	41751	44631	26938	36259	34297	26704			0.105	-0.114	0.554	0.58	0.095	0.424	0.363	-0.25			0.002	-0.003	0.222	0.213	-0.239	0.376	0.069	-0.259
Hmgcl	6.8%	HMGCL_MOUSE	1	2	Hydroxymethylglutaryl-CoA lyase, mitochondrial OS=Mus musculus GN=Hmgcl PE=1 SV=2	39714	P38060	NP_032280	15356	19490	13314	21520	27225	21345	29065	34200	29720			18149	14377	17088	21110	16929	28110	27895	29542			0.25	-0.303	0.405	0.761	0.421	0.827	1.096	0.88			0.148	-0.192	0.072	0.394	0.086	0.779	0.802	0.871
Hmox1	8.3%	HMOX1_MOUSE	1	2	Heme oxygenase 1 OS=Mus musculus GN=Hmox1 PE=1 SV=1	36861	P14901	NP_034572	15368	54170	41610	88720	86690	124160	33570	39015	26930			50442	44933	70448	67219	98470	32467	31821	26768			0.165	-0.19	0.86	0.855	1.367	-0.484	-0.276	-0.803			0.062	-0.079	0.527	0.488	1.033	-0.533	-0.57	-0.812
Hnrnpa1	2.2%	ROA1_MOUSE	1	1	Heterogeneous nuclear ribonucleoprotein A1 OS=Mus musculus GN=Hnrnpa1 PE=1 SV=2	38643	P49312	NP_034577	15382	60280	45690	59950	37930	50620	59430	84300	42100			56133	49339	47603	29411	40146	57478	68757	41847			0.186	-0.214	0.178	-0.482	-0.066	0.166	0.67	-0.332			0.083	-0.103	-0.155	-0.849	-0.4	0.117	0.376	-0.34
Hnrnph1	7.6%	HNRH1_MOUSE	2	4	Heterogeneous nuclear ribonucleoprotein H OS=Mus musculus GN=Hnrnph1 PE=1 SV=3	53349	O35737	NP_067485	59013	21435	21050	30680	28130	29570	20980	21440	15980			19961	22731	24361	21812	23451	20291	17487	15884			0.037	-0.037	0.477	0.31	0.411	0.075	0.047	-0.298			-0.066	0.074	0.144	-0.057	0.077	0.026	-0.246	-0.307
Hnrnpk	14%	HNRPK_MOUSE	5	6	Heterogeneous nuclear ribonucleoprotein K OS=Mus musculus GN=Hnrnpk PE=1 SV=1	56500	P61979	NP_001288269	15387	36720	29270	53130	49190	53880	39200	34080	55195			34193	31607	42187	38142	42732	37912	27797	54863			0.142	-0.159	0.012	0.212	0.026	0.116	-0.102	0.133			0.039	-0.048	-0.321	-0.155	-0.309	0.068	-0.396	0.124
Hnrnpm	1.2%	HNRPM_MOUSE	1	2	Heterogeneous nuclear ribonucleoprotein M OS=Mus musculus GN=Hnrnpm PE=1 SV=3	87335	Q9D0E1	NP_001103383	76936	86005	70800	100725	78840	73120	95560	108895	78160			80087	76454	79980	61131	57991	92421	88818	77690			0.132	-0.146	0.349	0.009	-0.121	0.286	0.47	-0.007			0.029	-0.035	0.016	-0.358	-0.456	0.238	0.176	-0.016
Hnrnpu	4.2%	HNRPU_MOUSE	2	5	Heterogeneous nuclear ribonucleoprotein U OS=Mus musculus GN=Hnrnpu PE=1 SV=1	104244	Q8VEK3	NP_058085	51810	61625	52938	53865	62460	52058	73330	73628	93008			57384	57165	42771	48432	41286	70922	60052	92449			0.104	-0.115	-0.058	0.06	-0.143	0.356	0.361	0.654			0	-0.004	-0.39	-0.308	-0.477	0.308	0.067	0.645
Hnrnpul2	3.9%	HNRL2_MOUSE	3	3	Heterogeneous nuclear ribonucleoprotein U-like protein 2 OS=Mus musculus GN=Hnrnpul2 PE=1 SV=2	95827	Q00PI9	NP_001074665	68693	36580	28040	20670	31870	28680	49450	51370	35540			34063	30280	16413	24712	22746	47825	41899	35327			0.092	-0.098	-0.644	-0.02	-0.694	0.674	0.669	0.137			-0.011	0.013	-0.977	-0.387	-1.028	0.625	0.375	0.129
Hprt1	21.6%	HPRT_MOUSE	4	5	Hypoxanthine-guanine phosphoribosyltransferase OS=Mus musculus GN=Hprt1 PE=1 SV=3	28908	P00493	NP_038584	15452	48585	46660	49295	55240	45325	83142	64040	60915			45241	50386	39142	42833	35948	80411	52232	60549			0.052	-0.056	0.014	0.146	-0.069	0.482	0.311	0.164			-0.05	0.055	-0.318	-0.222	-0.403	0.434	0.017	0.155
Hsd17b12	5.1%	DHB12_MOUSE	1	2	Very-long-chain 3-oxoacyl-CoA reductase OS=Mus musculus GN=Hsd17b12 PE=1 SV=1	41364	O70503	NP_062631	56348	44910	36665	61100	60965	36790	42540	46890	40810			41820	39592	48515	47272	29178	41143	38245	40565			0.14	-0.157	0.584	0.579	-0.148	0.063	0.202	0.001			0.038	-0.046	0.251	0.212	-0.482	0.014	-0.092	-0.008
Hsp90ab1	44.6%	HS90B_MOUSE	27	40	Heat shock protein HSP 90-beta OS=Mus musculus GN=Hsp90ab1 PE=1 SV=3	100988	P11499	NP_032328	15516	107620	99175	112525	143550	98700	90700	115645	79310			100214	107096	89350	111308	78277	87721	94323	78834			0.077	-0.082	0.136	0.48	-0.052	-0.125	0.293	-0.122			-0.025	0.029	-0.197	0.113	-0.386	-0.174	-0.001	-0.131
Hspa5	53.6%	GRP78_MOUSE	27	80	78 kDa glucose-regulated protein OS=Mus musculus GN=Hspa5 PE=1 SV=3	86700				130200	111600	252000	195650	109700	87890	95990	57750			121240	120512	200099	151706	87002	85003	78292	57403			0.102	-0.111	1.095	0.674	-0.034	-0.555	-0.337	-1.058			-0.001	0	0.762	0.307	-0.368	-0.603	-0.631	-1.067
Hspa8	44.9%	HSP7C_MOUSE	18	41	Heat shock cognate 71 kDa protein OS=Mus musculus GN=Hspa8 PE=1 SV=1	83659	P63017	NP_112442	15481	110808	91990	136300	148430	159050	88995	112000	76928			103182	99336	108228	115091	126140	86072	91351	76465			0.075	-0.078	0.438	0.498	0.603	-0.202	0.136	-0.408			-0.028	0.032	0.106	0.131	0.269	-0.25	-0.158	-0.417
Hspa9	34.2%	GRP75_MOUSE	17	29	Stress-70 protein, mitochondrial OS=Mus musculus GN=Hspa9 PE=1 SV=3	86076	P38647	NP_034611	15526	79140	72480	86730	85600	94530	67800	76460	76780			73694	78269	68867	66374	74970	65573	62363	76319			0.095	-0.114	0.221	0.261	0.375	-0.18	0.114	0.122			-0.008	-0.003	-0.111	-0.106	0.041	-0.228	-0.18	0.113
Hspd1	24.3%	CH60_MOUSE	9	14	60 kDa heat shock protein, mitochondrial OS=Mus musculus GN=Hspd1 PE=1 SV=1	73692	P63038	NP_034607	15510	51270	45550	62325	58120	59905	47595	57860	60460			47742	49188	49489	45065	47510	46032	47192	60097			0.051	-0.055	0.246	0.348	0.236	-0.113	0.328	-0.009			-0.052	0.056	-0.087	-0.019	-0.099	-0.161	0.034	-0.018
Hsph1	2.6%	HS105_MOUSE	2	2	Heat shock protein 105 kDa OS=Mus musculus GN=Hsph1 PE=1 SV=2	115420	Q61699	NP_001334463	15505	70065	62625	68035	90670	52355	59385	76360	67240			65244	67627	54023	70305	41522	57434	62281	66836			0.083	-0.088	0.162	0.502	-0.273	-0.224	0.22	-0.002			-0.02	0.023	-0.172	0.135	-0.607	-0.271	-0.074	-0.011
Hyal2	3.6%	HYAL2_MOUSE	1	2	Hyaluronidase-2 OS=Mus musculus GN=Hyal2 PE=1 SV=2	56732	O35632	NP_034619	15587	1770	1385	2761	1800	6726	1841	3380	1713			1649	1495	2192	1396	5335	1781	2756	1703			0.067	-0.148	0.634	0.063	1.97	0.099	0.94	0.158			-0.036	-0.038	0.301	-0.304	1.636	0.051	0.646	0.15
Iah1	3.2%	IAH1_MOUSE	1	1	Isoamyl acetate-hydrolyzing esterase 1 homolog OS=Mus musculus GN=Iah1 PE=1 SV=1	31621	Q9DB29	NP_080623	67732	125700	111000	119300	133100	84600	93350	165900	104400			117050	119865	94729	103205	67095	90284	135313	103774			0.087	-0.093	0.012	0.169	-0.484	-0.342	0.487	-0.181			-0.016	0.018	-0.321	-0.198	-0.819	-0.391	0.193	-0.19
Idh1	7.2%	IDHC_MOUSE	3	3	Isocitrate dehydrogenase [NADP] cytoplasmic OS=Mus musculus GN=Idh1 PE=1 SV=2	55981	O88844	NP_001104790	15926	79120	66640	55710	72830	48600	103400	117600	71910			73676	71962	44237	56472	38544	100004	95918	71478			0.119	-0.129	-0.054	-0.001	-0.415	0.505	0.69	-0.019			0.016	-0.018	-0.387	-0.368	-0.75	0.456	0.396	-0.028
Ifi205a	4.2%	IFI5A_MOUSE	1	2	Interferon-activable protein 205-A OS=Mus musculus GN=Ifi205a PE=2 SV=1	56030	Q8CGE8	NP_766236	226695	43040	30930	52895	56495	37570	27125	52475	22290			40078	33401	42001	43806	29796	26233	42800	22157			0.219	-0.258	0.516	0.611	0.022	-0.448	0.499	-0.749			0.116	-0.147	0.183	0.244	-0.312	-0.497	0.205	-0.758
Ifi44	10%	IFI44_MOUSE	3	4	Interferon-induced protein 44 OS=Mus musculus GN=Ifi44 PE=2 SV=1	56297	Q8BV66	NP_598632	99899	38030	26200	28490	37720	43670	36900	126700	22110			35413	28291	22622	29247	34634	35688	103340	21978			0.181	-0.207	-0.173	0.232	-0.015	-0.138	1.491	-0.733			0.078	-0.096	-0.506	-0.135	-0.349	-0.186	1.197	-0.741
Ifi44l	6.9%	IF44L_MOUSE	2	6	Interferon-induced protein 44-like OS=Mus musculus GN=Ifi44l PE=2 SV=2	57551	Q9BDB7	NP_112735	15061	46320	38300	41790	45380	45465	38415	97860	22990			43132	41358	33183	35187	36058	37153	79817	22852			0.135	-0.158	-0.074	0.111	0.008	-0.032	1.546	-0.678			0.032	-0.046	-0.407	-0.256	-0.327	-0.08	1.252	-0.687
Ikbkb	53.1%	IKKB_MOUSE	31	56	Inhibitor of nuclear factor kappa-B kinase subunit beta OS=Mus musculus GN=Ikbkb PE=1 SV=1	98546	O88351	NP_034676	16150	112100	87660	106700	122200	103700	105300	118000	93330			104386	94661	84725	94754	82243	101842	96244	92770			0.093	-0.099	0.269	0.399	0.065	0.129	0.213	-0.16			-0.01	0.012	-0.064	0.032	-0.269	0.081	-0.081	-0.168
Ikbkg	58.5%	NEMO_MOUSE	20	38	NF-kappa-B essential modulator OS=Mus musculus GN=Ikbkg PE=1 SV=2	55559	O88522	NP_001154895	16151	123300	109620	121322	121650	109850	183600	191800	115850			114815	118375	96335	94327	87121	177570	156437	115154			0.029	-0.03	-0.217	-0.166	-0.494	0.4	0.704	-0.12			-0.074	0.08	-0.55	-0.533	-0.829	0.352	0.41	-0.128
Il1a	7.4%	IL1A_MOUSE	1	1	Interleukin-1 alpha OS=Mus musculus GN=Il1a PE=1 SV=1	35930	P01582	NP_034684	16175	61810	47420	70080	109400	57960	51830	57460	44010			57557	51207	55646	84828	45967	50128	46866	43746			0.179	-0.204	0.36	1.002	0.086	-0.076	0.073	-0.311			0.076	-0.093	0.027	0.635	-0.249	-0.124	-0.221	-0.32
Il1b	10.8%	IL1B_MOUSE	1	2	Interleukin-1 beta OS=Mus musculus GN=Il1b PE=1 SV=1	35837	P10749	NP_032387	16176	13750	10645	9384	76780	7960	7531	5012	2776			12804	11494	7451	59535	6312	7284	4088	2760			0.173	-0.197	-0.379	2.653	-0.628	-0.697	-1.353	-2.149			0.07	-0.086	-0.712	2.286	-0.962	-0.745	-1.647	-2.158
Il23r	2.6%	IL23R_MOUSE	1	1	Interleukin-23 receptor OS=Mus musculus GN=Il23r PE=2 SV=1	81996	Q8K4B4	NP_653131	209590	12010	10060	8417	6286	9232	21810	25730	11460			11183	10864	6684	4874	7322	21094	20986	11392			0.122	-0.133	-0.391	-0.812	-0.257	0.983	1.221	0.055			0.019	-0.023	-0.723	-1.179	-0.592	0.935	0.927	0.046
Immt	3%	MIC60_MOUSE	2	2	MICOS complex subunit Mic60 OS=Mus musculus GN=Immt PE=1 SV=1	97080	Q8CAQ8	NP_001240610	76614	31805	30025	22515	31750	53420	30345	32070	30220			29616	32423	17877	24619	42366	29349	26157	30038			0.048	-0.052	-0.5	-0.06	0.793	-0.018	0.046	-0.023			-0.056	0.059	-0.833	-0.428	0.459	-0.066	-0.248	-0.033
Impa1	15.2%	IMPA1_MOUSE	3	4	Inositol monophosphatase 1 OS=Mus musculus GN=Impa1 PE=1 SV=1	34940	O55023			88370	79960	79710	87730	103500	94380	92090	116200			82290	86345	63293	68025	82085	91280	75111	115503			0.07	-0.074	-0.079	0.06	0.349	0.054	0.13	0.563			-0.033	0.037	-0.412	-0.307	0.015	0.006	-0.164	0.555
Impdh2	2.7%	IMDH2_MOUSE	1	1	Inosine-5~-monophosphate dehydrogenase 2 OS=Mus musculus GN=Impdh2 PE=1 SV=2	64887	P24547	NP_035960	23918	76750	62910	66920	75130	94820	57980	87400	82460			71469	67934	53137	58255	75200	56076	71285	81965			0.136	-0.151	-0.061	0.106	0.441	-0.268	0.324	0.24			0.033	-0.04	-0.394	-0.261	0.107	-0.316	0.03	0.231
Inpp5d	1.2%	SHIP1_MOUSE	1	1	Phosphatidylinositol 3,4,5-trisphosphate 5-phosphatase 1 OS=Mus musculus GN=Inpp5d PE=1 SV=2	155626	Q9ES52	NP_001103662	16331	27190	18280	22390	30280	34480	25290	40490	35550			25319	19740	17778	23479	27346	24459	33025	35337			0.258	-0.315	-0.022	0.413	0.601	0.154	0.833	0.645			0.155	-0.204	-0.355	0.046	0.266	0.105	0.539	0.636
Insrr	0.6%	INSRR_MOUSE	1	2	Insulin receptor-related protein OS=Mus musculus GN=Insrr PE=1 SV=2	157374	Q9WTL4	NP_035962	23920	25090	26440	32655	14945	21495	47020	37540	15975			23363	28552	25929	11589	17047	45476	30619	15879			-0.035	0.033	0.352	-0.803	-0.246	0.865	0.552	-0.681			-0.137	0.144	0.019	-1.17	-0.581	0.817	0.258	-0.69
Ipo5	5.9%	IPO5_MOUSE	3	3	Importin-5 OS=Mus musculus GN=Ipo5 PE=1 SV=3	138743	Q8BKC5	NP_076068	70572	23310	22910	39170	38090	21950	26560	43990	36130			21706	24740	31103	29535	17408	25687	35879	35913			0.012	-0.013	0.761	0.721	0.323	0.491	1.01	0.645			-0.09	0.098	0.429	0.354	-0.011	0.443	0.716	0.636
Iqgap1	26.1%	IQGA1_MOUSE	26	52	Ras GTPase-activating-like protein IQGAP1 OS=Mus musculus GN=Iqgap1 PE=1 SV=2	219672	Q9JKF1	NP_057930	29875	52028	43728	75095	74185	54745	52458	53805	39415			48447	47220	59628	57522	43417	50735	43885	39179			0.106	-0.114	0.608	0.526	0.255	0.048	0.176	-0.286			0.003	-0.003	0.276	0.16	-0.079	0	-0.118	-0.294
Isg15	30.4%	ISG15_MOUSE	3	7	Ubiquitin-like protein ISG15 OS=Mus musculus GN=Isg15 PE=1 SV=4	20807	Q64339	NP_056598	100038882	55425	39105	98010	111035	79660	14835	36040	9952			51611	42228	77824	86097	63178	14348	29394	9893			0.242	-0.294	1.048	1.234	0.761	-1.122	-0.26	-2.026			0.139	-0.183	0.715	0.867	0.427	-1.17	-0.554	-2.035
Isoc1	4.7%	ISOC1_MOUSE	1	1	Isochorismatase domain-containing protein 1 OS=Mus musculus GN=Isoc1 PE=1 SV=1	35735	Q91V64	NP_079754	66307	17860	17710	31390	32140	15680	13160	15700	11990			16631	19124	24925	24921	12436	12727	12806	11919			0.006	-0.006	0.82	0.854	-0.182	-0.435	-0.18	-0.569			-0.097	0.105	0.487	0.487	-0.516	-0.483	-0.474	-0.578
Isoc2a	26.2%	ISC2A_MOUSE	2	3	Isochorismatase domain-containing protein 2A OS=Mus musculus GN=Isoc2a PE=1 SV=1	24578	P85094	NP_001095068	664994	35790	25569	42247	51572	50732	50112	49455	41336			33327	27611	33546	39988	40235	48466	40336	41088			0.124	-0.15	0.483	0.837	0.692	0.259	0.889	0.474			0.02	-0.039	0.15	0.47	0.357	0.21	0.594	0.465
Isyna1	4.3%	INO1_MOUSE	1	1	Inositol-3-phosphate synthase 1 OS=Mus musculus GN=Isyna1 PE=1 SV=1	65645	Q9JHU9	NP_076116	71780	9831	9072	16800	16460	14420	14280	18850	16120			9154	9797	13340	12763	11437	13811	15374	16023			0.057	-0.059	0.83	0.8	0.609	0.595	0.996	0.77			-0.046	0.052	0.497	0.433	0.275	0.547	0.702	0.762
Itgb7	2.7%	ITB7_MOUSE	1	1	Integrin beta-7 OS=Mus musculus GN=Itgb7 PE=1 SV=2	95533	P26011	NP_038594	16421	7818	3680	13340	4106	9483	15620	19420	11900			7279	3973	10592	3183	7521	15107	15839	11829			0.443	-0.644	1.214	-0.486	0.722	1.442	1.756	1.05			0.341	-0.533	0.882	-0.853	0.388	1.394	1.462	1.041
Jup	14%	PLAK_MOUSE	8	14	Junction plakoglobin OS=Mus musculus GN=Jup PE=1 SV=3	90052	Q02257	NP_034723	16480	46520	42755	54342	37395	58965	42915	52852	36892			43319	46170	43150	28996	46765	41505	43108	36671			0.118	-0.128	0.563	-0.058	0.358	0.14	0.686	-0.176			0.015	-0.018	0.23	-0.425	0.023	0.092	0.392	-0.185
Kcnab2	11.4%	KCAB2_MOUSE	2	2	Voltage-gated potassium channel subunit beta-2 OS=Mus musculus GN=Kcnab2 PE=1 SV=1	46551	P62482	NP_001239585	16498	42585	39250	81290	60230	69945	39205	35975	22150			39654	42385	64548	46702	55472	37918	29342	22017			0.106	-0.121	1.153	0.596	0.988	0.104	-0.024	-0.728			0.003	-0.01	0.82	0.228	0.653	0.056	-0.318	-0.737
Kcnmb2	4.7%	KCMB2_MOUSE	1	1	Calcium-activated potassium channel subunit beta-2 OS=Mus musculus GN=Kcnmb2 PE=2 SV=1	30708	Q9CZM9	NP_082507	72413	13630	12630	19570	17520	23120	14500	15280	8716			12692	13638	15539	13585	18337	14024	12463	8664			0.054	-0.056	0.576	0.416	0.816	0.143	0.219	-0.591			-0.049	0.055	0.243	0.049	0.482	0.095	-0.075	-0.6
Kctd12	9.8%	KCD12_MOUSE	3	9	BTB/POZ domain-containing protein KCTD12 OS=Mus musculus GN=Kctd12 PE=1 SV=1	38217	Q6WVG3	NP_808383	239217	111900	92350	108700	146550	91980	121400	143300	93730			104199	99725	86312	113635	72947	117412	116879	93168			0.06	-0.062	0.126	0.397	-0.125	0.198	0.474	0.098			-0.043	0.049	-0.206	0.03	-0.459	0.15	0.18	0.089
Khdrbs1	3.2%	KHDR1_MOUSE	1	1	KH domain-containing, RNA-binding, signal transduction-associated protein 1 OS=Mus musculus GN=Khdrbs1 PE=1 SV=2	54470	Q60749	NP_035447	20218	93920	83090	92010	108400	71080	88970	108900	104000			87458	89726	73061	84053	56373	86048	88822	103376			0.086	-0.091	0.056	0.293	-0.316	0.008	0.299	0.233			-0.017	0.02	-0.277	-0.074	-0.651	-0.041	0.005	0.224
Kif26b	0.9%	KI26B_MOUSE	1	1	Kinesin-like protein KIF26B OS=Mus musculus GN=Kif26b PE=1 SV=3	256294	Q7TNC6	NP_001155137	269152	9549	5022	13180	13630	15180	11920	11780	12060			8892	5422	10465	10568	12040	11528	9608	11988			0.39	-0.537	0.855	0.904	1.059	0.71	0.693	0.727			0.287	-0.426	0.523	0.537	0.725	0.662	0.399	0.718
Kif5b	2.3%	KINH_MOUSE	1	1	Kinesin-1 heavy chain OS=Mus musculus GN=Kif5b PE=1 SV=3	132683	Q61768	NP_032474	16573	15210	8745	22650	21900	18460	16270	18900	17020			14162	9443	17985	16980	14641	15736	15416	16918			0.345	-0.454	0.919	0.871	0.624	0.442	0.658	0.507			0.242	-0.343	0.586	0.504	0.29	0.394	0.364	0.498
Klk14	8%	KLK14_MOUSE	1	2	Kallikrein-14 OS=Mus musculus GN=Klk14 PE=2 SV=1	29516	Q8CGR5	NP_777355	317653	33910	33215	92840	93590	75695	86365	21840	66285			31576	35868	73719	72569	60033	83528	17814	65887			0.024	-0.025	1.499	1.502	1.205	1.37	-0.519	0.893			-0.079	0.086	1.166	1.135	0.871	1.322	-0.813	0.884
KV3A5_MOUSE	14.4%	KV3A5_MOUSE	1	1	Ig kappa chain V-III region PC 2413 OS=Mus musculus PE=1 SV=1	12973	P01657			27260	21210	27820	25540	42520	18870	29970	16630			25383	22904	22091	19804	33723	18251	24444	16530			0.17	-0.192	0.199	0.076	0.811	-0.361	0.306	-0.543			0.067	-0.082	-0.134	-0.291	0.477	-0.409	0.012	-0.552
Lactb	15.2%	LACTB_MOUSE	5	8	Serine beta-lactamase-like protein LACTB, mitochondrial OS=Mus musculus GN=Lactb PE=1 SV=1	72354	Q9EP89	NP_109642	80907	76370	61600	107685	125900	107810	45990	57435	35410			71115	66519	85507	97622	85503	44480	46846	35197			0.147	-0.164	0.602	0.861	0.584	-0.268	-0.14	-0.697			0.044	-0.053	0.269	0.494	0.249	-0.316	-0.434	-0.706
Lamtor2	14.4%	LTOR2_MOUSE	1	2	Ragulator complex protein LAMTOR2 OS=Mus musculus GN=Lamtor2 PE=1 SV=1	14961	Q9JHS3	NP_112538	83409	3511	2799	3568	3021	6010	3350	6166	2465			3269	3023	2834	2342	4767	3239	5029	2451			0.061	-0.091	0.275	0.016	1.1	0.195	1.094	-0.901			-0.042	0.02	-0.058	-0.351	0.766	0.147	0.8	-0.91
Lars	2.2%	SYLC_MOUSE	1	1	Leucine--tRNA ligase, cytoplasmic OS=Mus musculus GN=Lars PE=1 SV=2	159881	Q8BMJ2	NP_598898	107045	21710	16460	30240	27920	36050	22710	26010	22550			20215	17775	24012	21649	28590	21964	21214	22415			0.186	-0.213	0.664	0.549	0.918	0.251	0.447	0.241			0.083	-0.103	0.331	0.182	0.583	0.203	0.153	0.232
Lasp1	11.4%	LASP1_MOUSE	3	3	LIM and SH3 domain protein 1 OS=Mus musculus GN=Lasp1 PE=1 SV=1	35416	Q61792	NP_034818	16796	56210	48450	52340	68910	80320	56580	49210	53310			52342	52319	41560	53433	63701	54722	40138	52989			0.103	-0.111	-0.048	0.151	0.239	0.105	-0.157	-0.098			0	0	-0.38	-0.216	-0.095	0.057	-0.451	-0.107
Lcp1	43.4%	PLSL_MOUSE	20	47	Plastin-2 OS=Mus musculus GN=Lcp1 PE=1 SV=4	81732	Q61233	NP_001234913	18826	101128	86610	102100	121605	108975	94852	106158	86412			94168	93527	81072	94292	86427	91737	86585	85893			0.128	-0.149	0.187	0.35	0.625	0.038	0.218	-0.154			0.025	-0.038	-0.145	-0.017	0.291	-0.01	-0.076	-0.162
Ldha	59.9%	LDHA_MOUSE	20	58	L-lactate dehydrogenase A chain OS=Mus musculus GN=Ldha PE=1 SV=3	43234	P06151	NP_034829	16828	139068	117050	160250	176650	148200	111212	153880	112838			129497	126398	127246	136974	117535	107560	125509	112160			0.096	-0.103	0.385	0.52	-0.018	-0.061	0.256	-0.139			-0.007	0.008	0.052	0.153	-0.352	-0.109	-0.038	-0.148
Lgals1	58.5%	LEG1_MOUSE	6	9	Galectin-1 OS=Mus musculus GN=Lgals1 PE=1 SV=3	17490	P16045	NP_032521	16852	74542	63735	78528	82042	60748	85198	87002	57752			69413	68825	62354	63615	48178	82399	70961	57405			0.062	-0.066	0.228	0.266	-0.388	0.345	0.326	-0.159			-0.041	0.046	-0.104	-0.1	-0.723	0.297	0.032	-0.168
Lgals3	12.9%	LEG3_MOUSE	3	3	Galectin-3 OS=Mus musculus GN=Lgals3 PE=1 SV=3	29445	P16110			18330	14880	22550	21750	18140	23090	21600	13410			17068	16069	17906	16866	14386	22332	17618	13329			0.143	-0.158	0.442	0.285	0.128	0.013	0.202	-0.308			0.04	-0.047	0.109	-0.082	-0.207	-0.035	-0.092	-0.317
Lgals9	10.5%	LEG9_MOUSE	1	1	Galectin-9 OS=Mus musculus GN=Lgals9 PE=1 SV=1	43847	O08573	NP_001152773	16859	11510	9282	38710	36650	33210	22770	27560	11230			10717	10023	30737	28418	26339	22023	22479	11163			0.147	-0.164	1.897	1.818	1.676	1.131	1.407	0.111			0.044	-0.053	1.564	1.451	1.341	1.083	1.113	0.103
Lrch3	1%	LRCH3_MOUSE	1	1	Leucine-rich repeat and calponin homology domain-containing protein 3 OS=Mus musculus GN=Lrch3 PE=1 SV=3	94246	Q8BVU0	NP_001074724	70144	17100	16400	28200	26190	25000	17690	17380	14420			15923	17709	22393	20308	19827	17109	14175	14334			0.03	-0.03	0.752	0.645	0.578	0.079	0.053	-0.216			-0.073	0.08	0.419	0.278	0.243	0.031	-0.241	-0.225
Lrrc59	20.2%	LRC59_MOUSE	4	4	Leucine-rich repeat-containing protein 59 OS=Mus musculus GN=Lrrc59 PE=1 SV=1	44020	Q922Q8	NP_598568	98238	66260	59815	91440	113300	68200	54325	75050	43265			61701	64592	72608	87853	54088	52541	61212	43005			0.06	-0.064	0.514	0.766	0.147	-0.173	0.186	-0.556			-0.042	0.048	0.182	0.399	-0.187	-0.221	-0.108	-0.565
Lrrfip2	16.6%	LRRF2_MOUSE	4	6	Leucine-rich repeat flightless-interacting protein 2 OS=Mus musculus GN=Lrrfip2 PE=1 SV=1	54795	Q91WK0	NP_001158310	71268	106835	93025	113255	104035	298350	56848	70520	47848			99483	100454	89929	80668	236616	54980	57518	47561			0.152	-0.172	0.211	0.077	1.425	-1.02	-0.35	-1.245			0.049	-0.061	-0.122	-0.29	1.09	-1.068	-0.644	-1.254
Lyz2	16.9%	LYZ2_MOUSE	1	5	Lysozyme C-2 OS=Mus musculus GN=Lyz2 PE=1 SV=2	18509	P08905	NP_059068	17105	59760	42490	85220	73150	41740	72070	68740	40500			55648	45884	67668	56720	33104	69703	56066	40256			0.176	-0.2	0.714	0.518	-0.236	0.45	0.443	-0.351			0.073	-0.09	0.382	0.151	-0.571	0.402	0.149	-0.359
Maea	5.3%	MAEA_MOUSE	1	3	Macrophage erythroblast attacher OS=Mus musculus GN=Maea PE=1 SV=1	52866	Q4VC33	NP_067475	59003	46730	31690	69800	57110	53210	72640	73530	44570			43514	34220	55425	44282	42200	70254	59974	44302			0.178	-0.203	0.876	0.646	0.439	0.888	0.905	0.183			0.075	-0.093	0.544	0.279	0.104	0.84	0.611	0.175
Map1s	1.3%	MAP1S_MOUSE	1	1	Microtubule-associated protein 1S OS=Mus musculus GN=Map1s PE=1 SV=2	109402	Q8C052	NP_766601	270058	8175	9118	6373	9714	7521	10590	10170	8881			7613	9846	5060	7532	5965	10242	8295	8828			-0.081	0.077	-0.44	0.168	-0.201	0.293	0.234	0.039			-0.184	0.187	-0.773	-0.199	-0.536	0.244	-0.06	0.03
Marco	9.8%	MARCO_MOUSE	3	3	Macrophage receptor MARCO OS=Mus musculus GN=Marco PE=1 SV=1	61689	Q60754	NP_034896	17167	39490	32940	64020	62630	40930	30980	34780	27920			36772	35571	50834	48562	32461	29963	28368	27752			0.031	-0.032	0.739	0.527	0.086	-0.12	0.053	-0.27			-0.072	0.079	0.406	0.16	-0.248	-0.169	-0.241	-0.279
Mat2a	6.1%	METK2_MOUSE	2	2	S-adenosylmethionine synthase isoform type-2 OS=Mus musculus GN=Mat2a PE=1 SV=2	50420	Q3THS6	NP_663544	232087	36355	33470	39410	40320	34290	35475	38420	32290			33853	36144	31293	31264	27195	34309	31337	32097			0.01	-0.014	0.276	0.296	0.092	0.046	0.118	-0.044			-0.093	0.097	-0.056	-0.071	-0.243	-0.002	-0.176	-0.052
Mccc1	60.8%	MCCA_MOUSE	34	68	Methylcrotonoyl-CoA carboxylase subunit alpha, mitochondrial OS=Mus musculus GN=Mccc1 PE=1 SV=2	90005	Q99MR8	NP_076133	72039	100410	100950	148000	170400	153800	121338	138125	68232			93501	109012	117518	132127	121977	117352	112659	67823			0.074	-0.082	0.294	0.476	0.252	0.132	0.189	-0.652			-0.029	0.028	-0.038	0.108	-0.082	0.084	-0.105	-0.66
Mccc2	56.8%	MCCB_MOUSE	25	56	Methylcrotonoyl-CoA carboxylase beta chain, mitochondrial OS=Mus musculus GN=Mccc2 PE=1 SV=1	67869	Q3ULD5	NP_084302	78038	77880	78010	112800	115000	116900	92420	104300	55760			72521	84240	89568	89170	92712	89384	85070	55425			0.098	-0.127	0.215	0.424	0.365	0.225	0.313	-0.638			-0.005	-0.016	-0.118	0.057	0.03	0.176	0.019	-0.647
Mcts2	11%	MCTS2_MOUSE	1	1	Malignant T-cell-amplified sequence 2 OS=Mus musculus GN=Mcts2 PE=1 SV=1	25464	Q9CQ21	NP_079819	66405	46670	31860	80750	81610	75480	61860	68060	56070			43458	34404	64119	63281	59862	59828	55512	55734			0.249	-0.301	1.04	1.056	0.943	0.656	0.794	0.514			0.146	-0.191	0.708	0.689	0.608	0.608	0.5	0.505
Mdh2	5.6%	MDHM_MOUSE	1	1	Malate dehydrogenase, mitochondrial OS=Mus musculus GN=Mdh2 PE=1 SV=3	42003	P08249	NP_032643	17448	75320	52180	101200	94860	64140	46920	78350	54600			70136	56347	80357	73554	50869	45379	63904	54272			0.241	-0.289	0.667	0.573	0.009	-0.442	0.298	-0.224			0.138	-0.178	0.334	0.206	-0.326	-0.49	0.003	-0.232
Med12	0.4%	MED12_MOUSE	1	2	Mediator of RNA polymerase II transcription subunit 12 OS=Mus musculus GN=Med12 PE=1 SV=1	272352	A2AGH6	NP_067496	59024	488905	473695	499800	500350	526185	486965	474105	530065			455261	511524	396862	387969	417310	470969	386693	526883			0.073	-0.079	0.002	-0.006	0.432	0.001	-0.05	0.296			-0.03	0.032	-0.331	-0.373	0.098	-0.047	-0.344	0.287
Mettl3	1.4%	MTA70_MOUSE	1	2	N6-adenosine-methyltransferase subunit METTL3 OS=Mus musculus GN=Mettl3 PE=1 SV=2	73739	Q8C3P7	NP_062695	56335	134165	106715	196095	102200	162525	190480	255605	106300			124932	115238	155708	79245	128897	184223	208478	105661			0.104	-0.115	0.676	-0.166	0.615	0.413	0.893	-0.309			0.001	-0.005	0.343	-0.533	0.281	0.365	0.599	-0.317
Mif	53.9%	MIF_MOUSE	4	16	Macrophage migration inhibitory factor OS=Mus musculus GN=Mif PE=1 SV=2	13584	P34884	NP_034928	17319	75800	64775	83415	158725	59530	56940	102280	51208			70584	69948	66236	123074	47213	55070	83423	50900			0.133	-0.152	0.358	1.075	-0.3	-0.058	0.722	-0.436			0.03	-0.04	0.025	0.708	-0.635	-0.106	0.428	-0.445
Mmp8	3.7%	MMP8_MOUSE	1	1	Neutrophil collagenase OS=Mus musculus GN=Mmp8 PE=2 SV=2	57502	O70138	NP_032637	17394	73640	74080	71170	65210	167400	63390	69500	60210			68573	79996	56511	50563	132763	61307	56686	59849			-0.004	0.004	-0.054	-0.18	1.18	-0.221	-0.088	-0.295			-0.107	0.115	-0.386	-0.547	0.846	-0.269	-0.382	-0.303
Mmp9	48.5%	MMP9_MOUSE	30	90	Matrix metalloproteinase-9 OS=Mus musculus GN=Mmp9 PE=1 SV=2	89073	P41245	NP_038627	17395	122660	124400	69205	78270	243048	59050	76778	241550			114220	134335	54952	60689	192758	57110	62622	240100			0.066	-0.064	-0.659	-0.498	1.052	-1.029	-0.43	0.856			-0.038	0.046	-0.992	-0.865	0.717	-1.078	-0.724	0.848
Mpeg1	12.5%	MPEG1_MOUSE	6	12	Macrophage-expressed gene 1 protein OS=Mus musculus GN=Mpeg1 PE=1 SV=1	89335	A1L314	NP_034951	17476	59182	38060	194125	60992	60632	51802	44888	35938			55110	41100	154143	47293	48086	50101	36611	35722			0.207	-0.244	1.658	0.322	0.315	-0.365	-0.281	-0.842			0.104	-0.132	1.326	-0.044	-0.019	-0.413	-0.575	-0.851
Mpo	1.7%	PERM_MOUSE	1	1	Myeloperoxidase OS=Mus musculus GN=Mpo PE=1 SV=2	88688	P11247	NP_034954	17523	55250	49790	70280	67720	57580	64460	45330	47450			51448	53766	55805	52510	45666	62342	36972	47165			0.073	-0.077	0.42	0.367	0.133	0.296	-0.212	-0.146			-0.03	0.034	0.088	0	-0.202	0.247	-0.506	-0.155
Mrc1	1.1%	MRC1_MOUSE	1	1	Macrophage mannose receptor 1 OS=Mus musculus GN=Mrc1 PE=1 SV=2	192360	Q61830	NP_032651	17533	27470	22020	14860	19400	12710	85440	24570	18490			25579	23778	11800	15043	10079	82633	20040	18379			0.151	-0.168	-0.736	-0.351	-0.961	1.788	-0.01	-0.42			0.048	-0.057	-1.068	-0.718	-1.296	1.74	-0.304	-0.429
Mrps35	2.5%	RT35_MOUSE	1	1	28S ribosomal protein S35, mitochondrial OS=Mus musculus GN=Mrps35 PE=1 SV=2	42539	Q8BJZ4	NP_663548	232536	18720	15350	20940	23900	26040	20370	22840	25690			17432	16577	16627	18532	20652	19700	18629	25536			0.136	-0.15	0.298	0.489	0.612	0.258	0.423	0.593			0.033	-0.039	-0.035	0.122	0.278	0.21	0.129	0.584
Msn	10.4%	MOES_MOUSE	4	7	Moesin OS=Mus musculus GN=Msn PE=1 SV=3	82735	P26041	NP_034963	17698	34868	30995	45130	53335	44638	27680	28022	24215			32468	33470	35836	41357	35401	26771	22856	24070			0.088	-0.095	0.568	0.707	0.503	-0.075	-0.15	-0.349			-0.015	0.016	0.236	0.34	0.169	-0.123	-0.444	-0.357
Msr1	4.4%	MSRE_MOUSE	1	2	Macrophage scavenger receptor types I and II OS=Mus musculus GN=Msr1 PE=1 SV=3	57354	P30204	NP_001106797	20288	51215	42785	65425	74805	39095	42305	53345	32735			47690	46202	51951	58004	31006	40915	43510	32538			0.091	-0.106	0.473	0.67	-0.232	-0.129	0.191	-0.486			-0.012	0.005	0.141	0.303	-0.566	-0.178	-0.103	-0.495
Mtap	12.4%	MTAP_MOUSE	2	5	S-methyl-5~-thioadenosine phosphorylase OS=Mus musculus GN=Mtap PE=1 SV=1	35966	Q9CQ65	NP_077753	66902	74965	61352	81612	70255	77935	72430	90770	79020			69806	66252	64804	54476	61810	70051	74034	78545			0.146	-0.165	0.214	-0.029	0.22	0.078	0.398	0.155			0.044	-0.054	-0.119	-0.396	-0.114	0.03	0.104	0.146
Mtch2	7.9%	MTCH2_MOUSE	1	2	Mitochondrial carrier homolog 2 OS=Mus musculus GN=Mtch2 PE=1 SV=1	36625	Q791V5	NP_001304170	56428	57345	35400	73225	100200	89170	77555	98455	94645			53399	38227	58145	77695	70720	75008	80303	94077			0.272	-0.339	0.733	1.089	1.079	0.738	1.076	1.039			0.169	-0.229	0.401	0.722	0.744	0.69	0.782	1.031
Mtpn	14.4%	MTPN_MOUSE	1	2	Myotrophin OS=Mus musculus GN=Mtpn PE=1 SV=2	16003	P62774	NP_032124	14489	81560	68720	109460	96600	91295	81585	109510	78275			75948	74208	86916	74903	72405	78906	89319	77805			0.113	-0.123	0.547	0.358	0.272	0.124	0.548	0.068			0.01	-0.012	0.214	-0.009	-0.063	0.076	0.254	0.06
Myh10	1.4%	MYH10_MOUSE	1	1	Myosin-10 OS=Mus musculus GN=Myh10 PE=1 SV=2	274969	Q61879	NP_780469	77579	14710	11770	53530	43510	63570	12650	10710	6352			13698	12710	42506	33737	50417	12234	8735	6314			0.152	-0.17	2.015	1.716	2.263	-0.066	-0.306	-1.06			0.049	-0.059	1.683	1.349	1.929	-0.114	-0.6	-1.068
Myh14	3%	MYH14_MOUSE	6	13	Myosin-14 OS=Mus musculus GN=Myh14 PE=1 SV=1	256400	Q6URW6	NP_001258467	71960	140200	128775	250350	206850	257200	91530	83325	44728			130552	139059	198788	160390	203981	88523	67962	44459			0.082	-0.088	0.915	0.575	1.05	-0.5	-0.876	-1.547			-0.02	0.022	0.582	0.208	0.717	-0.548	-1.169	-1.556
Myh9	60.6%	MYH9_MOUSE	151	913	Myosin-9 OS=Mus musculus GN=Myh9 PE=1 SV=4	274637	Q8VDD5	NP_071855	17886	156600	140200	239600	216400	271700	95920	83470	45595			145824	151397	190252	167795	215482	92769	68080	45321			0.085	-0.092	0.733	0.541	0.95	-0.565	-0.786	-1.643			-0.018	0.019	0.4	0.174	0.616	-0.613	-1.08	-1.652
Myl12b	47.1%	ML12B_MOUSE	6	100	Myosin regulatory light chain 12B OS=Mus musculus GN=Myl12b PE=1 SV=2	23490	Q3THE2	NP_075891	67938	179625	152875	241775	206925	383500	104530	116675	58095			167264	165084	191980	160448	304148	101096	95163	57746			0.098	-0.105	0.319	0.066	1.456	-0.712	-0.497	-1.31			-0.005	0.006	-0.014	-0.301	1.121	-0.761	-0.791	-1.319
Myl6	57.6%	MYL6_MOUSE	10	47	Myosin light polypeptide 6 OS=Mus musculus GN=Myl6 PE=1 SV=3	19382	Q60605	NP_001304147	17904	214150	196850	198200	157200	644450	72800	81102	46565			199413	212571	157379	121892	511104	70409	66149	46286			0.06	-0.064	0.245	-0.052	1.621	-1.138	-1.006	-1.816			-0.043	0.046	-0.088	-0.42	1.287	-1.186	-1.3	-1.825
Myl6b	3.9%	MYL6B_MOUSE	1	1	Myosin light chain 6B OS=Mus musculus GN=Myl6b PE=1 SV=1	27661	Q8CI43	NP_758463	216459	327300	314400	386200	333200	1003000	165900	148200	91630			304777	339508	306659	258361	795465	160450	120876	91080			0.029	-0.029	0.267	0.054	1.644	-0.952	-1.114	-1.808			-0.074	0.082	-0.065	-0.313	1.31	-1	-1.408	-1.817
Myl9	29.1%	MYL9_MOUSE	2	8	Myosin regulatory light polypeptide 9 OS=Mus musculus GN=Myl9 PE=1 SV=3	23336	Q9CQ19	NP_742116	98932	17216	15194	23000	21945	43870	17183	21700	13999			16030	16407	18262	17016	34792	16619	17700	13915			0.202	-0.279	0.834	0.722	1.659	0.132	0.418	-0.446			0.098	-0.168	0.502	0.356	1.324	0.084	0.124	-0.455
Myo18a	12%	MY18A_MOUSE	18	23	Unconventional myosin-XVIIIa OS=Mus musculus GN=Myo18a PE=1 SV=2	269845	Q9JMH9	NP_001278141	360013	61215	46745	78930	74605	100032	37495	30240	21690			57002	50479	62674	57849	79335	36263	24666	21560			0.1	-0.107	0.69	0.574	0.881	-0.266	-0.514	-1.151			-0.003	0.003	0.357	0.206	0.546	-0.314	-0.808	-1.16
Myo1b	23.6%	MYO1B_MOUSE	17	25	Unconventional myosin-Ib OS=Mus musculus GN=Myo1b PE=1 SV=3	153113	P46735	NP_034993	17912	47360	37780	47675	33070	121900	29080	35020	23950			44101	40797	37855	25642	96677	28125	28564	23806			0.1	-0.108	-0.03	-0.426	1.763	-0.797	-0.431	-0.83			-0.002	0.003	-0.363	-0.793	1.429	-0.846	-0.725	-0.838
Myo1c	30.7%	MYO1C_MOUSE	25	41	Unconventional myosin-Ic OS=Mus musculus GN=Myo1c PE=1 SV=2	138306	Q9WTI7	NP_001074243	17913	61820	61840	113550	113600	87345	48100	38860	23860			57567	66779	90164	88084	69273	46520	31695	23717			0.067	-0.087	0.881	0.92	0.568	-0.357	-0.511	-1.154			-0.036	0.024	0.548	0.553	0.233	-0.405	-0.805	-1.163
Myo1d	9.9%	MYO1D_MOUSE	7	9	Unconventional myosin-Id OS=Mus musculus GN=Myo1d PE=1 SV=1	136972	Q5SYD0	NP_796364	338367	36710	31610	20320	13610	139800	10440	21930	14800			34183	34134	16135	10553	110874	10097	17886	14711			0.104	-0.112	-0.425	-1	2.061	-1.225	-0.37	-1.035			0.001	-0.001	-0.758	-1.367	1.727	-1.273	-0.664	-1.043
Myo1e	32.2%	MYO1E_MOUSE	28	54	Unconventional myosin-Ie OS=Mus musculus GN=Myo1e PE=1 SV=1	148219	E9Q634	NP_851417	71602	107102	99280	70915	50592	394700	47952	60752	43045			99732	107209	56311	39229	313030	46378	49551	42787			0.076	-0.08	-0.48	-1.024	1.992	-1.127	-0.614	-1.24			-0.027	0.03	-0.812	-1.391	1.657	-1.175	-0.909	-1.25
Myo1f	13.3%	MYO1F_MOUSE	12	19	Unconventional myosin-If OS=Mus musculus GN=Myo1f PE=1 SV=1	143109	P70248			76662	71438	70098	56345	221675	49525	44315	31636			71387	77143	55660	43689	175808	47898	36145	31445			0.064	-0.068	-0.323	-0.484	1.615	-0.519	-0.923	-1.028			-0.038	0.044	-0.656	-0.851	1.28	-0.567	-1.217	-1.038
Myo1g	2.8%	MYO1G_MOUSE	2	2	Unconventional myosin-Ig OS=Mus musculus GN=Myo1g PE=1 SV=1	128435	Q5SUA5	NP_848534	246177	27585	24075	42985	31900	44410	14830	15790	11634			25687	25998	34132	24735	35221	14343	12879	11564			0.094	-0.101	0.642	0.284	0.74	-0.871	-0.767	-1.198			-0.009	0.01	0.309	-0.082	0.406	-0.92	-1.061	-1.207
Myo5a	10%	MYO5A_MOUSE	14	23	Unconventional myosin-Va OS=Mus musculus GN=Myo5a PE=1 SV=2	255325	Q99104	NP_034994	17918	72540	67130	117475	168950	78455	52970	44940	33645			67548	72491	93280	131002	62222	51230	36654	33443			0.088	-0.094	0.731	1.224	0.21	-0.332	-0.871	-1.453			-0.016	0.018	0.398	0.857	-0.125	-0.38	-1.165	-1.461
Myo6	2.7%	MYO6_MOUSE	3	5	Unconventional myosin-VI OS=Mus musculus GN=Myo6 PE=1 SV=1	174039	Q64331			36045	35615	63030	45825	102255	15370	16470	13105			33565	38459	50049	35532	81097	14865	13434	13026			0.061	-0.063	0.666	0.092	1.38	-1.226	-0.844	-1.298			-0.042	0.048	0.334	-0.275	1.046	-1.275	-1.138	-1.307
Myof	2.8%	MYOF_MOUSE	3	4	Myoferlin OS=Mus musculus GN=Myof PE=1 SV=2	268231	Q69ZN7	NP_001093104	226101	39270	35800	50130	51890	47380	43020	59770	43810			36568	38659	39806	40235	37577	41607	48750	43547			0.105	-0.113	0.408	0.467	0.336	-0.242	0.308	0.581			0.002	-0.002	0.076	0.1	0.002	-0.29	0.014	0.572
Naa20	3.9%	NAA20_MOUSE	1	1	N-alpha-acetyltransferase 20 OS=Mus musculus GN=Naa20 PE=1 SV=1	22245	P61600	NP_001135437	67877	89490	89450	81860	56610	86030	73410	115100	145000			83331	96593	65000	43895	68228	70998	93879	144129			0	0	-0.128	-0.66	-0.057	-0.285	0.363	0.697			-0.103	0.111	-0.461	-1.027	-0.391	-0.334	0.069	0.688
Nampt	4.1%	NAMPT_MOUSE	1	2	Nicotinamide phosphoribosyltransferase OS=Mus musculus GN=Nampt PE=1 SV=1	66468	Q99KQ4	NP_067499	59027	43265	31570	66800	89245	48750	43655	59675	31855			40288	34090	53041	69199	38663	42221	48673	31664			0.214	-0.254	0.82	1.246	0.391	0.214	0.654	-0.221			0.112	-0.143	0.487	0.879	0.056	0.166	0.36	-0.229
Nars	6.1%	SYNC_MOUSE	2	2	Asparagine--tRNA ligase, cytoplasmic OS=Mus musculus GN=Nars PE=1 SV=2	73171	Q8BP47	NP_001136422	70223	52480	44952	61760	62360	50405	51445	60255	42565			48868	48541	49041	48353	39975	49755	49145	42310			0.2	-0.249	0.42	0.243	0.256	0.281	0.608	-0.174			0.097	-0.138	0.087	-0.124	-0.079	0.232	0.314	-0.182
Ncf1	12.6%	NCF1_MOUSE	4	6	Neutrophil cytosol factor 1 OS=Mus musculus GN=Ncf1 PE=1 SV=3	50997	Q09014	NP_001272966	17969	53335	46015	57672	68905	44075	57955	65065	45925			49665	49689	45794	53429	34956	56052	53069	45649			0.08	-0.086	0.24	0.477	-0.064	0.203	0.464	-0.024			-0.024	0.025	-0.092	0.11	-0.399	0.155	0.17	-0.033
Ncf2	2.3%	NCF2_MOUSE	1	1	Neutrophil cytosol factor 2 OS=Mus musculus GN=Ncf2 PE=1 SV=1	69987	O70145	NP_035007	17970	112600	104100	123300	125200	125200	98010	131200	95990			104851	112413	97905	97080	99295	94790	107010	95414			0.056	-0.058	0.186	0.209	0.209	-0.145	0.276	-0.175			-0.047	0.053	-0.146	-0.158	-0.126	-0.193	-0.018	-0.183
Ncf4	13.9%	NCF4_MOUSE	4	5	Neutrophil cytosol factor 4 OS=Mus musculus GN=Ncf4 PE=1 SV=2	44583	P97369	NP_032703	17972	58095	53450	61725	74040	45345	47780	82955	68210			54098	57719	49013	57410	35963	46211	67660	67800			0.104	-0.112	0.194	0.438	-0.237	-0.232	0.72	0.367			0	-0.001	-0.138	0.072	-0.572	-0.28	0.426	0.359
Ndufa4	23.2%	NDUA4_MOUSE	2	2	Cytochrome c oxidase subunit NDUFA4 OS=Mus musculus GN=Ndufa4 PE=1 SV=2	11383	Q62425	NP_035016	17992	173700	168015	143970	148550	236400	162965	187400	228050			161747	181433	114319	115186	187486	157612	152848	226681			0.036	-0.037	-0.283	-0.28	0.426	-0.054	0.152	0.382			-0.067	0.074	-0.616	-0.648	0.091	-0.102	-0.142	0.374
Nfkb2	3.1%	NFKB2_MOUSE	1	2	Nuclear factor NF-kappa-B p100 subunit OS=Mus musculus GN=Nfkb2 PE=1 SV=1	106909	Q9WTK5	NP_001170840	18034	12254	7658	17716	22385	16422	11882	15190	12871			11412	8269	14068	17357	13024	11492	12390	12794			0.272	-0.343	0.748	1.186	0.635	0.325	0.353	0.384			0.169	-0.232	0.415	0.819	0.301	0.276	0.059	0.376
Ngp	5.4%	NGP_MOUSE	1	1	Neutrophilic granule protein OS=Mus musculus GN=Ngp PE=1 SV=1	21953	O08692	NP_032720	18054	81060	69490	118900	96460	97790	44520	69660	57270			75482	75039	94411	74795	77556	43057	56817	56926			0.107	-0.115	0.66	0.358	0.378	-0.758	-0.112	-0.394			0.004	-0.005	0.327	-0.009	0.043	-0.806	-0.406	-0.403
Nktr	0.5%	NKTR_MOUSE	1	1	NK-tumor recognition protein OS=Mus musculus GN=Nktr PE=1 SV=4	196746	P30415	NP_035048	18087	15480	11540	7702	9708	8346	30330	35180	14950			14415	12461	6116	7527	6619	29333	28694	14860			0.196	-0.227	-0.811	-0.477	-0.695	1.167	1.381	0.146			0.094	-0.117	-1.143	-0.844	-1.029	1.119	1.087	0.137
Npepps	1.4%	PSA_MOUSE	1	1	Puromycin-sensitive aminopeptidase OS=Mus musculus GN=Npepps PE=1 SV=2	117236	Q11011	NP_032968	19155	44120	43280	56630	64700	41900	48710	56900	42660			41084	46737	44967	50168	33231	47110	46410	42404			0.014	-0.014	0.374	0.566	-0.061	0.157	0.381	-0.035			-0.089	0.097	0.041	0.199	-0.395	0.108	0.087	-0.043
Npm1	4.5%	NPM_MOUSE	1	1	Nucleophosmin OS=Mus musculus GN=Npm1 PE=1 SV=1	40502	Q61937	NP_032748	18148	72360	61300	77050	78240	80520	63490	81790	52930			67380	66196	61181	60668	63859	61405	66710	52612			0.115	-0.125	0.205	0.227	0.269	-0.074	0.291	-0.336			0.012	-0.014	-0.127	-0.14	-0.066	-0.122	-0.003	-0.345
Nup155	1.3%	NU155_MOUSE	1	1	Nuclear pore complex protein Nup155 OS=Mus musculus GN=Nup155 PE=1 SV=1	170079	Q99P88	NP_573490	170762	57860	49680	61850	57870	62220	61160	62660	52710			53878	53648	49111	44871	49345	59151	51107	52394			0.106	-0.114	0.202	0.106	0.211	0.186	0.221	-0.029			0.003	-0.003	-0.131	-0.261	-0.124	0.138	-0.073	-0.037
Oas1a	8.4%	OAS1A_MOUSE	2	4	2~-5~-oligoadenylate synthase 1A OS=Mus musculus GN=Oas1a PE=1 SV=2	49275	P11928	NP_660212	246730	13154	9722	16720	15065	14840	11557	15125	9231			12249	10499	13277	11682	11770	11178	12337	9176			0.238	-0.298	0.684	0.554	0.516	0.138	0.57	-0.139			0.134	-0.187	0.352	0.186	0.181	0.089	0.276	-0.148
Oas3	1.4%	OAS3_MOUSE	1	1	2~-5~-oligoadenylate synthase 3 OS=Mus musculus GN=Oas3 PE=1 SV=1	142344	Q8VI93	NP_660261	246727	20610	20710	39790	48890	13430	11320	29900	10170			19192	22364	31595	37909	10652	10948	24388	10108			-0.003	0.003	0.946	1.243	-0.621	-0.868	0.533	-1.023			-0.106	0.114	0.613	0.876	-0.956	-0.916	0.239	-1.031
Opa1	6.5%	OPA1_MOUSE	3	3	Dynamin-like 120 kDa protein, mitochondrial OS=Mus musculus GN=Opa1 PE=1 SV=1	131032	P58281	NP_598513	74143	28220	24150	33400	31440	41740	33580	52630	42170			26278	26078	26521	24378	33104	32477	42927	41916			0.046	-0.047	0.233	0.22	0.467	0.359	1.007	0.837			-0.057	0.063	-0.1	-0.147	0.132	0.311	0.713	0.828
P4ha1	15.5%	P4HA1_MOUSE	6	8	Prolyl 4-hydroxylase subunit alpha-1 OS=Mus musculus GN=P4ha1 PE=1 SV=2	70553	Q60715	NP_001303300	18451	58920	51835	72872	92200	66365	37828	62335	27798			54865	55975	57864	71491	52633	36584	50842	27631			0.092	-0.1	0.546	1.046	0.406	-0.541	0.192	-0.814			-0.011	0.011	0.213	0.68	0.071	-0.589	-0.102	-0.823
P4hb	33.8%	PDIA1_MOUSE	12	17	Protein disulfide-isomerase OS=Mus musculus GN=P4hb PE=1 SV=2	69109	P09103	NP_035162	18453	105105	91462	137850	148850	124875	88908	128070	83630			97872	98766	109458	115418	99035	85987	104457	83128			0.11	-0.12	0.353	0.671	0.352	-0.444	0.145	-0.423			0.007	-0.01	0.02	0.304	0.017	-0.492	-0.15	-0.432
Palld	2.2%	PALLD_MOUSE	1	1	Palladin OS=Mus musculus GN=Palld PE=1 SV=2	169159	Q9ET54	NP_001074859	72333	9700	7046	18710	25110	10290	7291	10210	6953			9032	7609	14857	19470	8161	7051	8328	6911			0.212	-0.249	1.16	1.584	0.297	-0.2	0.286	-0.268			0.109	-0.138	0.827	1.217	-0.037	-0.248	-0.008	-0.277
Park7	34.9%	PARK7_MOUSE	3	3	Protein deglycase DJ-1 OS=Mus musculus GN=Park7 PE=1 SV=1	23903	Q99LX0	NP_065594	57320	32950	27810	48020	46620	38410	45090	47100	29630			30683	30030	38129	36148	30462	43609	38416	29452			0.158	-0.177	0.207	0.348	-0.15	0.429	0.308	-0.071			0.055	-0.066	-0.126	-0.019	-0.485	0.381	0.014	-0.08
Parp14	0.8%	PAR14_MOUSE	1	1	Poly [ADP-ribose] polymerase 14 OS=Mus musculus GN=Parp14 PE=1 SV=3	243195	Q2EMV9	NP_001034619	547253	23400	14230	30010	45860	18070	16410	33910	11680			21789	15366	23830	35559	14331	15871	27658	11609			0.315	-0.403	0.674	1.285	-0.058	-0.197	0.85	-0.688			0.212	-0.292	0.341	0.918	-0.393	-0.245	0.556	-0.697
Pbx4	4%	PBX4_MOUSE	1	1	Pre-B-cell leukemia transcription factor 4 OS=Mus musculus GN=Pbx4 PE=2 SV=2	47032	Q99NE9	NP_001020125	80720	162300	150400	193700	181300	193900	167900	226400	168400			151132	162411	153806	140580	153779	162385	184658	167388			0.054	-0.056	0.309	0.214	0.311	0.103	0.534	0.107			-0.049	0.055	-0.024	-0.153	-0.024	0.055	0.24	0.098
Pc	59.3%	PYC_MOUSE	49	137	Pyruvate carboxylase, mitochondrial OS=Mus musculus GN=Pc PE=1 SV=1	143864	Q05920			116300	105600	151300	216600	129600	101285	122750	59190			108297	114034	120139	167950	102783	97958	100118	58835			0.096	-0.074	0.506	1.018	0.249	-0.298	0.186	-0.985			-0.007	0.037	0.173	0.651	-0.085	-0.346	-0.108	-0.993
Pcbp1	14.3%	PCBP1_MOUSE	4	7	Poly(rC)-binding protein 1 OS=Mus musculus GN=Pcbp1 PE=1 SV=1	41425	P60335	NP_035995	23983	102475	101890	91495	104775	78918	115570	126910	146300			95423	110027	72651	81241	62588	111774	103511	145421			0.034	-0.036	-0.096	0.049	-0.262	0.307	0.311	0.524			-0.069	0.074	-0.428	-0.318	-0.597	0.259	0.017	0.515
Pcbp2	8%	PCBP2_MOUSE	2	4	Poly(rC)-binding protein 2 OS=Mus musculus GN=Pcbp2 PE=1 SV=1	42721	Q61990	NP_001096635	18521	43265	36560	38065	48485	40940	51225	52220	57155			40288	39480	30225	37595	32469	49543	42592	56811			0.115	-0.126	-0.015	0.262	0.155	0.332	0.416	0.484			0.012	-0.014	-0.348	-0.104	-0.18	0.284	0.122	0.475
Pcca	64.4%	PCCA_MOUSE	41	123	Propionyl-CoA carboxylase alpha chain, mitochondrial OS=Mus musculus GN=Pcca PE=1 SV=2	91956	Q91ZA3	NP_659093	110821	150100	131800	173000	188650	191700	118530	146070	105585			139771	142325	137369	146278	152034	114637	119139	104951			0.079	-0.084	0.341	0.439	0.436	-0.095	0.171	-0.442			-0.024	0.027	0.008	0.072	0.101	-0.143	-0.123	-0.451
Pccb	65.6%	PCCB_MOUSE	25	67	Propionyl-CoA carboxylase beta chain, mitochondrial OS=Mus musculus GN=Pccb PE=1 SV=2	64728	Q99MN9	NP_001298078	66904	137400	120315	149500	156800	157400	164000	185900	130845			127945	129923	118710	121582	124832	158613	151625	130059			0.086	-0.094	0.179	0.22	0.288	0.307	0.31	-0.098			-0.016	0.017	-0.154	-0.147	-0.047	0.259	0.016	-0.107
Pcna	8.4%	PCNA_MOUSE	2	2	Proliferating cell nuclear antigen OS=Mus musculus GN=Pcna PE=1 SV=2	33004	P17918	NP_035175	18538	99210	83960	96805	114900	80610	95665	138150	91300			92383	90665	76867	89093	63931	92523	112678	90752			0.116	-0.128	0.078	0.328	-0.185	0.049	0.591	-0.009			0.014	-0.016	-0.255	-0.04	-0.52	0.001	0.297	-0.017
Pdcd6ip	7.7%	PDC6I_MOUSE	3	10	Programmed cell death 6-interacting protein OS=Mus musculus GN=Pdcd6ip PE=1 SV=3	111430	Q9WU78	NP_001158149	18571	12530	8592	17555	20810	16150	16855	19870	16410			11668	9278	13939	16136	12809	16302	16206	16311			0.257	-0.313	0.79	0.754	0.348	0.527	0.915	0.66			0.154	-0.203	0.457	0.387	0.014	0.478	0.621	0.651
Pdia6	5.5%	PDIA6_MOUSE	2	2	Protein disulfide-isomerase A6 OS=Mus musculus GN=Pdia6 PE=1 SV=3	56261	Q922R8	NP_082235	71853	32614	25831	37668	36770	23212	29252	27999	23716			30370	27894	29911	28511	18410	28291	22836	23573			0.328	-0.488	0.429	0.484	-0.487	0.11	-0.593	0.045			0.225	-0.378	0.096	0.116	-0.821	0.062	-0.887	0.035
Pdxk	6.7%	PDXK_MOUSE	1	2	Pyridoxal kinase OS=Mus musculus GN=Pdxk PE=1 SV=1	39403	Q8K183	NP_742146	216134	18900	13630	22945	18230	25305	24505	24385	21600			17600	14719	18220	14136	20069	23700	19889	21470			0.22	-0.265	0.491	0.168	0.624	0.595	0.584	0.407			0.117	-0.154	0.158	-0.199	0.29	0.547	0.29	0.398
Pepd	3.2%	PEPD_MOUSE	1	1	Xaa-Pro dipeptidase OS=Mus musculus GN=Pepd PE=1 SV=3	60316	Q11136	NP_032846	18624	69950	45720	68220	64110	73440	79100	82010	72330			65137	49371	54170	49710	58245	76501	66890	71896			0.274	-0.339	0.238	0.149	0.345	0.452	0.504	0.323			0.172	-0.228	-0.094	-0.218	0.01	0.404	0.21	0.314
Pf4	11.4%	PLF4_MOUSE	1	1	Platelet factor 4 OS=Mus musculus GN=Pf4 PE=1 SV=1	13756	Q9Z126	NP_064316	56744	111800	104700	96740	259000	103400	89570	86640	67890			104107	113061	76816	200827	82005	86628	70666	67482			0.047	-0.048	-0.162	1.259	-0.066	-0.273	-0.321	-0.673			-0.056	0.063	-0.495	0.892	-0.401	-0.321	-0.615	-0.682
Pfdn5	11.7%	PFD5_MOUSE	1	1	Prefoldin subunit 5 OS=Mus musculus GN=Pfdn5 PE=1 SV=1	21527	Q9WU28	NP_081320	56612	11120	9426	10770	13110	13760	10170	13100	17650			10355	10179	8552	10165	10913	9836	10684	17544			0.114	-0.124	0.068	0.352	0.422	-0.015	0.351	0.781			0.011	-0.013	-0.265	-0.015	0.087	-0.063	0.057	0.772
Pfkl	3.8%	PFKAL_MOUSE	1	1	ATP-dependent 6-phosphofructokinase, liver type OS=Mus musculus GN=Pfkl PE=1 SV=4	94583	P12382	NP_032852	18641	6358	4727	8166	9055	8526	8815	9211	6105			5921	5104	6485	7021	6762	8525	7512	6069			0.198	-0.23	0.559	0.708	0.621	0.669	0.733	0.139			0.095	-0.119	0.226	0.341	0.287	0.621	0.439	0.131
Pfkp	4.6%	PFKAP_MOUSE	2	3	ATP-dependent 6-phosphofructokinase, platelet type OS=Mus musculus GN=Pfkp PE=1 SV=1	97656	Q9WUA3	NP_001278000	56421	51638	40894	54330	67522	45012	53562	62012	43624			48084	44159	43140	52355	35699	51803	50579	43362			0.294	-0.411	0.506	0.655	0.438	0.351	0.64	0.018			0.192	-0.3	0.174	0.288	0.104	0.303	0.346	0.009
Pfn1	21.4%	PROF1_MOUSE	2	2	Profilin-1 OS=Mus musculus GN=Pfn1 PE=1 SV=2	17410	P62962	NP_035202	18643	40615	33940	67425	49355	53830	31725	44605	35535			37821	36651	53539	38270	42692	30683	36381	35321			0.124	-0.136	0.873	0.428	0.524	-0.246	0.234	-0.098			0.02	-0.024	0.54	0.061	0.189	-0.294	-0.06	-0.107
Pgam1	5.5%	PGAM1_MOUSE	1	1	Phosphoglycerate mutase 1 OS=Mus musculus GN=Pgam1 PE=1 SV=3	33282	Q9DBJ1	NP_075907	18648	24390	23720	35160	28040	34070	28660	36940	17610			22711	25615	27918	21743	27021	27719	30130	17505			0.02	-0.02	0.548	0.221	0.502	0.253	0.619	-0.45			-0.083	0.091	0.215	-0.146	0.168	0.205	0.325	-0.459
Pgk1	6.7%	PGK1_MOUSE	2	2	Phosphoglycerate kinase 1 OS=Mus musculus GN=Pgk1 PE=1 SV=4	54546	P09411	NP_032854	18655	47580	39345	61725	62510	51495	39675	60940	29195			44306	42487	49013	48469	40841	38371	49705	29019			0.144	-0.16	0.521	0.496	0.424	-0.186	0.496	-0.67			0.04	-0.05	0.188	0.129	0.089	-0.234	0.201	-0.679
Phgdh	7.3%	SERA_MOUSE	3	3	D-3-phosphoglycerate dehydrogenase OS=Mus musculus GN=Phgdh PE=1 SV=3	63306	Q61753	NP_058662	236539	23510	17530	30570	25340	30920	23690	23900	17700			21892	18930	24274	19648	24522	22912	19493	17593			0.098	-0.105	0.502	0.466	0.518	-0.122	0.105	-0.163			-0.005	0.006	0.169	0.099	0.184	-0.17	-0.189	-0.172
Picalm	3%	PICAL_MOUSE	1	1	Phosphatidylinositol-binding clathrin assembly protein OS=Mus musculus GN=Picalm PE=1 SV=1	81065	Q7M6Y3	NP_001239449	233489	27550	23190	30330	37400	31180	31590	36150	27880			25654	25042	24083	28999	24728	30552	29485	27713			0.119	-0.13	0.258	0.56	0.297	0.316	0.511	0.136			0.016	-0.019	-0.075	0.193	-0.037	0.268	0.217	0.127
Pitrm1	11.6%	PREP_MOUSE	7	9	Presequence protease, mitochondrial OS=Mus musculus GN=Pitrm1 PE=1 SV=1	135396	Q8K411	NP_660113	69617	62910	58130	75205	87100	90480	73735	76575	59080			58581	62773	59715	67537	71758	71313	62457	58725			0.101	-0.109	0.062	0.346	0.059	0.288	0.365	0.073			-0.001	0.002	-0.271	-0.021	-0.276	0.24	0.071	0.064
Pkm	43.7%	KPYM_MOUSE	17	34	Pyruvate kinase PKM OS=Mus musculus GN=Pkm PE=1 SV=4	67086	P52480	NP_001240812	18746	75160	62240	84320	101580	68190	86190	105650	65960			69988	67210	66953	78764	54081	83359	86171	65565			0.116	-0.126	0.186	0.363	-0.042	0.203	0.608	-0.043			0.013	-0.015	-0.147	-0.004	-0.377	0.155	0.314	-0.052
Plec	6.4%	PLEC_MOUSE	20	24	Plectin OS=Mus musculus GN=Plec PE=1 SV=3	596528	Q9QXS1	NP_001157012	18810	37155	29485	43100	35680	49145	33360	36050	32615			34597	31840	34223	27666	38976	32265	29404	32419			0.113	-0.123	0.498	0.063	0.53	0.036	0.106	-0.028			0.011	-0.012	0.165	-0.304	0.195	-0.012	-0.188	-0.037
Plek	6.9%	PLEK_MOUSE	1	1	Pleckstrin OS=Mus musculus GN=Plek PE=1 SV=1	48468	Q9JHK5	NP_062422	56193	20560	17740	31190	22970	22130	17860	20160	13570			19146	19156	24766	17811	17550	17273	16443	13489			0.102	-0.11	0.704	0.262	0.209	-0.101	0.074	-0.497			0	0.001	0.371	-0.105	-0.126	-0.149	-0.22	-0.506
Plekho2	8.9%	PKHO2_MOUSE	2	2	Pleckstrin homology domain-containing family O member 2 OS=Mus musculus GN=Plekho2 PE=1 SV=1	63119	Q8K124	NP_694759	102595	61330	68480	100470	71145	132380	121830	79055	74895			57109	73949	79777	55165	104990	117827	64479	74445			-0.113	0.104	0.658	0.418	0.962	0.796	0.472	0.384			-0.216	0.214	0.326	0.051	0.627	0.748	0.178	0.376
Plin3	21.1%	PLIN3_MOUSE	5	7	Perilipin-3 OS=Mus musculus GN=Plin3 PE=1 SV=1	51930	Q9DBG5	NP_080112	66905	26820	16610	33930	33845	34415	28610	29000	37010			24974	17936	26941	26243	27295	27670	23653	36788			0.252	-0.307	0.28	0.234	0.344	0.133	0.403	0.439			0.149	-0.197	-0.053	-0.133	0.01	0.084	0.109	0.431
Plod3	8.9%	PLOD3_MOUSE	4	6	Procollagen-lysine,2-oxoglutarate 5-dioxygenase 3 OS=Mus musculus GN=Plod3 PE=1 SV=1	91626	Q9R0E1	NP_036092	26433	21595	17345	22550	28065	27580	13420	21385	15645			20109	18729	17906	21761	21873	12979	17442	15552			0.032	-0.033	0.11	0.422	0.333	-0.339	0.49	-0.038			-0.071	0.078	-0.222	0.055	-0.001	-0.388	0.196	-0.047
Pomt2	0.9%	POMT2_MOUSE	1	1	Protein O-mannosyl-transferase 2 OS=Mus musculus GN=Pomt2 PE=1 SV=1	99485	Q8BGQ4	NP_700464	217734	89980	81150	83110	76790	94270	79840	80810	88890			83788	87631	65993	59542	74764	77218	65910	88357			0.073	-0.076	-0.042	-0.156	0.14	-0.1	-0.082	0.055			-0.03	0.034	-0.375	-0.523	-0.195	-0.148	-0.377	0.046
Ppa2	5.8%	IPYR2_MOUSE	1	1	Inorganic pyrophosphatase 2, mitochondrial OS=Mus musculus GN=Ppa2 PE=1 SV=1	45192	Q91VM9	NP_001280570	74776	18240	18150	23680	21450	24590	21170	24800	21340			16985	19599	18803	16632	19502	20474	20228	21212			0.004	-0.004	0.38	0.237	0.435	0.218	0.447	0.23			-0.099	0.107	0.047	-0.13	0.1	0.17	0.153	0.221
Ppia	11.6%	PPIA_MOUSE	1	1	Peptidyl-prolyl cis-trans isomerase A OS=Mus musculus GN=Ppia PE=1 SV=2	21339	P17742	NP_032933	268373	2117	2117	5653	9317	3084	7781	1961	2396			1971	2286	4488	7224	2446	7525	1599	2382			0	0	1.417	2.138	0.543	1.878	-0.11	0.179			-0.103	0.111	1.084	1.771	0.208	1.83	-0.404	0.17
Ppp1ca	10.6%	PP1A_MOUSE	2	3	Serine/threonine-protein phosphatase PP1-alpha catalytic subunit OS=Mus musculus GN=Ppp1ca PE=1 SV=1	43299	P62137	NP_114074	19045	67118	50338	90562	84042	111380	63742	72512	59132			62499	54357	71911	65166	88334	61649	59143	58776			0.19	-0.232	0.759	0.651	1.062	0.177	0.393	0.176			0.088	-0.122	0.426	0.284	0.727	0.129	0.099	0.168
Ppp2ca	4.5%	PP2AA_MOUSE	1	1	Serine/threonine-protein phosphatase 2A catalytic subunit alpha isoform OS=Mus musculus GN=Ppp2ca PE=1 SV=1	39135	P63330	NP_062284	19052	37070	27510	39190	36560	47530	29810	32680	24790			34519	29707	31119	28349	37696	28830	26654	24641			0.199	-0.231	0.279	0.179	0.558	-0.115	0.017	-0.381			0.096	-0.12	-0.053	-0.188	0.223	-0.163	-0.277	-0.39
Ppp2r1a	14.3%	2AAA_MOUSE	5	11	Serine/threonine-protein phosphatase 2A 65 kDa regulatory subunit A alpha isoform OS=Mus musculus GN=Ppp2r1a PE=1 SV=3	73642	Q76MZ3	NP_058587	51792	14160	10890	16926	24860	14230	14519	24310	17830			13185	11759	13440	19277	11286	14042	19827	17723			0.209	-0.245	0.5	0.835	0.189	0.095	0.898	0.336			0.106	-0.134	0.167	0.468	-0.145	0.047	0.604	0.328
Ppp5c	2.2%	PPP5_MOUSE	1	1	Serine/threonine-protein phosphatase 5 OS=Mus musculus GN=Ppp5c PE=1 SV=3	66405	Q60676	NP_035285	19060	27290	21530	23420	22450	27130	23050	20850	28060			25412	23250	18596	17408	21517	22293	17006	27892			0.161	-0.181	-0.06	-0.121	0.152	-0.083	-0.227	0.201			0.058	-0.07	-0.392	-0.488	-0.182	-0.131	-0.521	0.192
Prdx1	57.8%	PRDX1_MOUSE	12	59	Peroxiredoxin-1 OS=Mus musculus GN=Prdx1 PE=1 SV=1	26974	P35700	NP_035164	18477	128950	121500	177850	188750	105000	125300	190050	91005			120077	131204	141220	146355	83274	121184	155010	90459			0.072	-0.076	0.271	0.532	-0.406	-0.21	0.566	-0.488			-0.031	0.035	-0.062	0.165	-0.74	-0.258	0.272	-0.497
Prdx2	26.3%	PRDX2_MOUSE	5	12	Peroxiredoxin-2 OS=Mus musculus GN=Prdx2 PE=1 SV=3	25144	Q61171	NP_001304314	21672	95570	84635	88230	107420	93000	83430	105375	117365			88993	91394	70059	83292	73757	80690	85947	116660			0.045	-0.047	-0.003	0.121	0.055	-0.053	0.368	0.612			-0.058	0.064	-0.335	-0.246	-0.279	-0.101	0.074	0.603
Prdx5	19%	PRDX5_MOUSE	2	3	Peroxiredoxin-5, mitochondrial OS=Mus musculus GN=Prdx5 PE=1 SV=2	25892	P99029	NP_036151	54683	7464	6161	15910	15506	9350	9506	13390	7998			6950	6653	12633	12024	7416	9194	10921	7950			0.094	-0.117	1.251	1.159	0.476	0.467	1.066	-0.175			-0.008	-0.006	0.918	0.792	0.141	0.419	0.772	-0.184
Prkar1a	12.3%	KAP0_MOUSE	3	3	cAMP-dependent protein kinase type I-alpha regulatory subunit OS=Mus musculus GN=Prkar1a PE=1 SV=3	48485	Q9DBC7	NP_001300902	19084	43000	32200	38900	40740	33480	52840	55670	40960			40040	34771	30888	31590	26552	51104	45406	40714			0.194	-0.224	0.049	0.116	-0.167	0.574	0.566	0.489			0.091	-0.113	-0.284	-0.251	-0.502	0.526	0.272	0.48
Prkcd	4.5%	KPCD_MOUSE	3	3	Protein kinase C delta type OS=Mus musculus GN=Prkcd PE=1 SV=3	93246	P28867	NP_035233	18753	16660	10790	12920	16480	12360	11330	14420	20730			15513	11651	10260	12779	9802	10958	11761	20606			-0.01	0.01	-0.087	0.264	-0.346	-0.183	0.168	-0.216			-0.113	0.121	-0.42	-0.103	-0.68	-0.231	-0.126	-0.224
Prpsap2	3%	KPRB_MOUSE	1	1	Phosphoribosyl pyrophosphate synthase-associated protein 2 OS=Mus musculus GN=Prpsap2 PE=1 SV=1	46983	Q8R574	NP_001157714	212627	28800	22240	41820	26630	41010	17240	31590	12340			26817	24016	33206	20648	32524	16674	25766	12266			0.174	-0.198	0.713	0.061	0.684	-0.566	0.308	-1.048			0.072	-0.088	0.38	-0.306	0.35	-0.614	0.014	-1.057
Prss2	14.2%	TRY2_MOUSE	2	6	Anionic trypsin-2 OS=Mus musculus GN=Prss2 PE=1 SV=1	28475	P07146	NP_033456	22072	55794	45250	73198	63060	59645	51245	60925	52732			51955	48864	58121	48897	47304	49562	49692	52416			0.139	-0.188	0.603	0.479	0.339	0.14	0.398	0.131			0.036	-0.078	0.27	0.112	0.005	0.092	0.104	0.123
Psap	2.7%	SAP_MOUSE	1	2	Prosaposin OS=Mus musculus GN=Psap PE=1 SV=2	72200	Q61207	NP_001139592	19156	23570	16378	33244	41150	24294	46554	47290	26470			21948	17686	26396	31907	19267	45024	38572	26311			0.329	-0.45	0.884	1.181	0.514	0.918	1.388	0.395			0.226	-0.339	0.551	0.814	0.18	0.87	1.094	0.387
Psma2	9%	PSA2_MOUSE	1	1	Proteasome subunit alpha type-2 OS=Mus musculus GN=Psma2 PE=1 SV=3	29233	P49722	NP_032970	19166	18550	8903	22080	18930	27960	18710	33310	13490			17273	9614	17532	14678	22175	18096	27168	13409			0.434	-0.625	0.686	0.464	1.026	0.447	1.279	-0.025			0.332	-0.514	0.353	0.097	0.692	0.399	0.985	-0.034
Psmb3	7.8%	PSB3_MOUSE	1	2	Proteasome subunit beta type-3 OS=Mus musculus GN=Psmb3 PE=1 SV=1	26214	Q9R1P1	NP_036101	26446	25580	23185	35620	23950	29240	25875	38375	18340			23819	25037	28283	18571	23191	25025	31299	18230			0.068	-0.072	0.549	-0.026	0.257	0.065	0.656	-0.411			-0.035	0.039	0.216	-0.393	-0.077	0.017	0.362	-0.419
Psmc2	3.7%	PRS7_MOUSE	2	2	26S protease regulatory subunit 7 OS=Mus musculus GN=Psmc2 PE=1 SV=5	56579	P46471			45575	42080	45425	43925	50555	44575	43305	38780			42439	45441	36069	34060	40095	43112	35321	38547			0.057	-0.062	0.038	-0.001	0.201	0.024	-0.022	-0.186			-0.046	0.05	-0.295	-0.368	-0.133	-0.024	-0.316	-0.195
Psmc3	10.9%	PRS6A_MOUSE	2	5	26S protease regulatory subunit 6A OS=Mus musculus GN=Psmc3 PE=1 SV=2	58282	O88685	NP_032974	19182	10825	8238	14212	18056	19376	13362	14002	12048			10080	8895	11284	14001	15368	12923	11420	11976			0.335	-0.546	0.855	1.161	1.239	0.818	0.769	0.643			0.232	-0.435	0.522	0.794	0.905	0.77	0.475	0.635
Psmc5	3.2%	PRS8_MOUSE	1	1	26S protease regulatory subunit 8 OS=Mus musculus GN=Psmc5 PE=1 SV=1	53560	P62196	NP_032976	19184	48690	45070	37690	38690	120900	29660	40230	34620			45340	48669	29927	30000	95884	28687	32813	34412			0.055	-0.057	-0.315	-0.277	1.367	-0.66	-0.221	-0.437			-0.048	0.054	-0.648	-0.644	1.032	-0.709	-0.515	-0.446
Psmc6	7.5%	PRS10_MOUSE	2	2	26S protease regulatory subunit 10B OS=Mus musculus GN=Psmc6 PE=1 SV=1	51534	P62334	NP_080235	67089	20950	16215	26740	26595	30780	17420	24590	19038			19508	17510	21233	20621	24411	16848	20057	18924			0.171	-0.194	0.554	0.481	0.7	-0.034	0.412	-0.056			0.068	-0.084	0.22	0.114	0.365	-0.082	0.117	-0.065
Psme1	40.6%	PSME1_MOUSE	8	18	Proteasome activator complex subunit 1 OS=Mus musculus GN=Psme1 PE=1 SV=2	35930	P97371	NP_035319	19186	122145	110200	117565	149525	100705	112460	135735	127290			113739	119000	93351	115940	79868	108766	110710	126526			0.079	-0.083	0.104	0.588	-0.353	0.136	0.373	0.262			-0.024	0.028	-0.229	0.221	-0.687	0.088	0.079	0.253
Psme2	33.9%	PSME2_MOUSE	7	11	Proteasome activator complex subunit 2 OS=Mus musculus GN=Psme2 PE=1 SV=4	32539	P97372	NP_001025026	19188	67740	67270	62660	78730	82170	47450	72960	57000			63078	72643	49755	61046	65168	45891	59509	56657			0.138	-0.179	0.307	0.791	-0.198	-0.121	0.355	0.197			0.035	-0.068	-0.026	0.424	-0.533	-0.169	0.061	0.189
Psmg1	8.7%	PSMG1_MOUSE	2	2	Proteasome assembly chaperone 1 OS=Mus musculus GN=Psmg1 PE=1 SV=1	38063	Q9JK23	NP_062410	56088	31860	29330	33620	36830	25840	36215	39395	40605			29668	31672	26696	28558	20493	35025	32132	40361			0.062	-0.066	0.17	0.286	-0.232	0.215	0.362	0.39			-0.04	0.046	-0.163	-0.082	-0.567	0.167	0.067	0.381
Psmg2	4.5%	PSMG2_MOUSE	1	1	Proteasome assembly chaperone 2 OS=Mus musculus GN=Psmg2 PE=1 SV=1	33971	Q9EST4	NP_598899	107047	6946	3816	5954	6894	4414	7024	5244	7200			6468	4120	4728	5346	3501	6794	4277	7157			0.368	-0.496	0.146	0.357	-0.286	0.384	-0.037	0.42			0.265	-0.385	-0.187	-0.01	-0.62	0.336	-0.331	0.411
Ptbp1	8.2%	PTBP1_MOUSE	2	3	Polypyrimidine tract-binding protein 1 OS=Mus musculus GN=Ptbp1 PE=1 SV=2	63775	P17225			27422	24800	36192	31222	34080	28628	27865	26088			25535	26781	28739	24211	27029	27688	22727	25930			0.1	-0.11	0.532	0.338	0.426	0.122	0.184	-0.018			-0.003	0	0.199	-0.03	0.092	0.074	-0.11	-0.027
Pter	4.3%	PTER_MOUSE	1	1	Phosphotriesterase-related protein OS=Mus musculus GN=Pter PE=1 SV=1	44118	Q60866	NP_001292365	19212	12560	13840	14120	13620	17450	16140	17430	16700			11696	14945	11212	10561	13840	15610	14216	16600			-0.072	0.068	0.097	0.045	0.403	0.29	0.401	0.339			-0.175	0.179	-0.236	-0.322	0.068	0.242	0.107	0.331
Ptges	5.2%	PTGES_MOUSE	1	1	Prostaglandin E synthase OS=Mus musculus GN=Ptges PE=1 SV=1	18820	Q9JM51	NP_071860	64292	12230	9089	18200	14810	12470	8793	8352	3667			11389	9815	14452	11483	9889	8504	6813	3645			0.198	-0.23	0.772	0.474	0.226	-0.278	-0.352	-1.539			0.095	-0.119	0.439	0.107	-0.108	-0.326	-0.646	-1.548
Ptges3	6.2%	TEBP_MOUSE	1	1	Prostaglandin E synthase 3 OS=Mus musculus GN=Ptges3 PE=1 SV=1	21974	Q9R0Q7	NP_062740	56351	204000	191400	201000	272900	184400	220200	243300	195400			189962	206685	159602	211605	146245	212967	198442	194227			0.045	-0.047	0.024	0.465	-0.1	0.156	0.299	-0.017			-0.058	0.064	-0.309	0.098	-0.435	0.107	0.005	-0.026
Ptgr1	4%	PTGR1_MOUSE	1	1	Prostaglandin reductase 1 OS=Mus musculus GN=Ptgr1 PE=1 SV=2	42296	Q91YR9	NP_080244	67103	26330	24200	36330	36190	19770	18430	29050	18240			24517	26133	28848	28061	15679	17824	23694	18131			0.06	-0.062	0.524	0.518	-0.354	-0.455	0.201	-0.47			-0.043	0.049	0.191	0.151	-0.688	-0.503	-0.093	-0.479
Ptgs2	2.3%	PGH2_MOUSE	1	1	Prostaglandin G/H synthase 2 OS=Mus musculus GN=Ptgs2 PE=1 SV=1	77960	Q05769	NP_035328	19225	68030	65260	78710	143300	66240	58910	67720	41790			63348	70472	62499	111114	52534	56975	55234	41539			0.03	-0.03	0.24	1.104	-0.009	-0.178	0.023	-0.673			-0.073	0.081	-0.093	0.737	-0.343	-0.226	-0.271	-0.682
Ptpn6	2%	PTN6_MOUSE	1	1	Tyrosine-protein phosphatase non-receptor type 6 OS=Mus musculus GN=Ptpn6 PE=1 SV=2	77942	P29351	NP_001071173	15170	30050	25920	34250	23650	83690	15970	16520	12280			27981	27989	27196	18339	66373	15446	13474	12206			0.103	-0.111	0.291	-0.243	1.58	-0.809	-0.76	-1.188			0	0	-0.041	-0.61	1.246	-0.857	-1.054	-1.197
Pxn	12.2%	PAXI_MOUSE	3	3	Paxillin OS=Mus musculus GN=Pxn PE=1 SV=1	72964	Q8VI36	NP_035353	19303	7076	2249	13150	13500	11160	9896	13890	12330			6589	2429	10442	10469	8851	9571	11329	12257			0.5	-0.771	0.84	0.832	0.514	0.606	1.045	1.176			0.397	-0.66	0.508	0.465	0.18	0.558	0.751	1.167
Pycard	26.4%	ASC_MOUSE	4	8	Apoptosis-associated speck-like protein containing a CARD OS=Mus musculus GN=Pycard PE=1 SV=1	24023	Q9EPB4	NP_075747	66824	75825	71950	58910	86390	58750	105810	118400	88500			70607	77697	46777	66986	46594	102334	96571	87969			0.127	-0.14	-0.36	0.336	-0.422	0.35	0.724	0.356			0.024	-0.029	-0.692	-0.03	-0.755	0.302	0.43	0.347
Pygb	29.8%	PYGB_MOUSE	19	28	Glycogen phosphorylase, brain form OS=Mus musculus GN=Pygb PE=1 SV=3	109728	Q8CI94	NP_722476	110078	53490	41360	80170	61450	115900	44850	41700	39800			49810	44664	63658	47648	91918	43377	34011	39561			0.102	-0.111	0.533	0.146	1.106	-0.48	-0.454	-0.731			-0.001	0	0.2	-0.221	0.772	-0.528	-0.748	-0.739
Pygl	20.7%	PYGL_MOUSE	11	14	Glycogen phosphorylase, liver form OS=Mus musculus GN=Pygl PE=1 SV=4	113211	Q9ET01	NP_573461	110095	45620	38450	53400	46470	75350	27340	29200	23330			42481	41521	42402	36032	59759	26443	23816	23190			0.119	-0.13	0.466	0.174	1.04	-0.433	-0.066	-0.744			0.016	-0.019	0.134	-0.193	0.706	-0.481	-0.36	-0.753
R3hdm2	1%	R3HD2_MOUSE	1	3	R3H domain-containing protein 2 OS=Mus musculus GN=R3hdm2 PE=1 SV=2	126254	Q80TM6	NP_001161764	71750	34630	34410	42580	43170	33390	41520	39660	34630			32247	37158	33811	33474	26481	40156	32347	34422			0.085	-0.091	0.223	0.115	0.048	-0.154	0.097	0.025			-0.017	0.02	-0.11	-0.252	-0.286	-0.202	-0.197	0.016
Rab10	6%	RAB10_MOUSE	1	2	Ras-related protein Rab-10 OS=Mus musculus GN=Rab10 PE=1 SV=1	27796	P61027	NP_057885	19325	51640	50120	65535	58645	64160	48955	52905	54230			48087	54122	52037	45473	50885	47347	43150	53904			0.021	-0.022	0.363	0.205	0.334	-0.057	0.056	0.091			-0.082	0.089	0.031	-0.162	0	-0.105	-0.238	0.082
Rab11fip1	3.6%	RFIP1_MOUSE	1	2	Rab11 family-interacting protein 1 OS=Mus musculus GN=Rab11fip1 PE=1 SV=2	85364	Q9D620	NP_083699	75767	26510	12700	78925	72700	46545	16465	16225	10446			24685	13715	62670	56371	36914	15924	13233	10383			0.437	-0.656	2.011	1.886	1.249	-0.255	-0.285	-0.918			0.334	-0.546	1.679	1.519	0.915	-0.304	-0.579	-0.926
Rab18	14.6%	RAB18_MOUSE	2	4	Ras-related protein Rab-18 OS=Mus musculus GN=Rab18 PE=1 SV=2	26972	P35293	NP_851415	19330	47450	39100	57520	56960	47470	39790	52035	37805			44185	42223	45673	44166	37648	38483	42441	37578			0.142	-0.157	0.387	0.454	0.136	-0.173	0.238	-0.195			0.038	-0.046	0.054	0.086	-0.199	-0.221	-0.056	-0.204
Rab1A	7.8%	RAB1A_MOUSE	1	4	Ras-related protein Rab-1A OS=Mus musculus GN=Rab1A PE=1 SV=3	27016	P62821	NP_033022	19324	16815	14170	25385	19120	26445	12175	13945	14785			15658	15302	20157	14825	20974	11775	11374	14696			0.106	-0.116	0.707	0.222	0.668	-0.318	-0.188	-0.065			0.003	-0.005	0.374	-0.145	0.334	-0.366	-0.482	-0.074
Rab1b	8.5%	RAB1B_MOUSE	1	1	Ras-related protein Rab-1B OS=Mus musculus GN=Rab1b PE=1 SV=1	26240	Q9D1G1	NP_083852	76308	15710	13890	17360	14520	25170	11300	14720	19730			14629	14999	13784	11259	19962	10929	12006	19612			0.086	-0.092	0.23	-0.028	0.766	-0.389	-0.008	0.415			-0.017	0.019	-0.103	-0.395	0.432	-0.437	-0.302	0.406
Rab5c	6.5%	RAB5C_MOUSE	1	1	Ras-related protein Rab-5C OS=Mus musculus GN=Rab5c PE=1 SV=2	26834	P35278	NP_077776	19345	16730	13120	17300	16820	21080	15720	21740	16730			15579	14168	13737	13042	16718	15204	17731	16630			0.165	-0.186	0.213	0.172	0.498	0.075	0.543	0.165			0.062	-0.075	-0.12	-0.195	0.164	0.027	0.249	0.156
Rac2	17.2%	RAC2_MOUSE	4	7	Ras-related C3 botulinum toxin substrate 2 OS=Mus musculus GN=Rac2 PE=1 SV=1	25264	Q05144	NP_033034	19354	101568	92765	108438	127825	115698	90535	102620	99918			94578	100174	86105	99114	91758	87561	83699	99318			0.07	-0.075	0.115	0.338	0.232	-0.074	0.286	0.176			-0.032	0.036	-0.217	-0.029	-0.103	-0.122	-0.008	0.167
Rack1	26.2%	RACK1_MOUSE	6	8	Receptor of activated protein C kinase 1 OS=Mus musculus GN=Rack1 PE=1 SV=3	39636	P68040	NP_032169	14694	46865	41830	51710	57740	50145	41770	58120	40470			43640	45170	41060	44771	39769	40398	47404	40227			0.064	-0.062	0.33	0.599	0.27	0.097	0.482	0.024			-0.039	0.049	-0.002	0.232	-0.065	0.05	0.188	0.015
Ranbp10	2.1%	RBP10_MOUSE	1	1	Ran-binding protein 10 OS=Mus musculus GN=Ranbp10 PE=1 SV=2	73158	Q6VN19	NP_665823	74334	23270	20400	26730	20230	22000	28180	18910	25060			21668	22029	21225	15686	17448	27254	15423	24910			0.092	-0.098	0.292	-0.11	0.011	0.368	-0.207	0.199			-0.011	0.013	-0.041	-0.477	-0.324	0.32	-0.502	0.19
Ranbp9	4.9%	RANB9_MOUSE	2	2	Ran-binding protein 9 OS=Mus musculus GN=Ranbp9 PE=1 SV=1	78066	P69566	NP_064314	56705	32820	28745	44190	39040	33580	35825	39420	22545			30561	31040	35088	30271	26631	34648	32152	22410			0.105	-0.114	0.478	0.344	0.107	0.208	0.38	-0.409			0.002	-0.004	0.146	-0.024	-0.227	0.16	0.086	-0.417
Rars	2.7%	SYRC_MOUSE	1	1	Arginine--tRNA ligase, cytoplasmic OS=Mus musculus GN=Rars PE=1 SV=2	89715	Q9D0I9	NP_080212	104458	32570	21760	30560	35990	36580	27250	34920	28800			30329	23497	24266	27907	29011	26355	28482	28627			0.262	-0.32	0.17	0.406	0.429	0.005	0.362	0.084			0.159	-0.209	-0.163	0.039	0.095	-0.044	0.068	0.076
Rasl2-9	6%	RANT_MOUSE	1	1	GTP-binding nuclear protein Ran, testis-specific isoform OS=Mus musculus GN=Rasl2-9 PE=2 SV=1	28732	Q61820	NP_033054	19428	54830	43590	49020	55990	91730	45120	57890	39330			51057	47071	38924	43415	72749	43638	47217	39094			0.156	-0.175	-0.006	0.186	0.898	-0.125	0.234	-0.323			0.053	-0.064	-0.338	-0.181	0.564	-0.173	-0.06	-0.332
Rdh13	3.6%	RDH13_MOUSE	1	2	Retinol dehydrogenase 13 OS=Mus musculus GN=Rdh13 PE=1 SV=1	41539	Q8CEE7	NP_001277338	108841	6752	4644	14725	10464	11960	10982	11110	10149			6287	5016	11693	8113	9486	10621	9062	10088			0.242	-0.292	1.383	0.863	1.082	0.923	0.976	0.83			0.139	-0.181	1.05	0.496	0.747	0.875	0.682	0.821
Rhoa	12.4%	RHOA_MOUSE	1	2	Transforming protein RhoA OS=Mus musculus GN=Rhoa PE=1 SV=1	26235	Q9QUI0	NP_001300890	11848	30795	23085	44120	38990	63735	34260	32350	73160			28676	24928	35033	30232	50547	33135	26386	72721			0.191	-0.222	0.711	0.534	1.243	0.348	0.264	1.438			0.088	-0.111	0.379	0.167	0.909	0.299	-0.03	1.429
Rhog	19.9%	RHOG_MOUSE	2	3	Rho-related GTP-binding protein RhoG OS=Mus musculus GN=Rhog PE=1 SV=1	24272	P84096	NP_062512	56212	55870	49190	66485	63035	72370	50890	64492	53718			52025	53119	52792	48877	57395	49218	52602	53395			0.108	-0.124	0.374	0.293	0.503	-0.078	0.31	-0.084			0.005	-0.014	0.041	-0.074	0.169	-0.126	0.016	-0.092
Ripk1	1.7%	RIPK1_MOUSE	1	1	Receptor-interacting serine/threonine-protein kinase 1 OS=Mus musculus GN=Ripk1 PE=1 SV=1	85747	Q60855	NP_033094	19766	24140	19770	23820	25080	21520	21260	23570	24120			22479	21348	18915	19446	17067	20561	19224	23975			0.137	-0.151	0.118	0.192	-0.029	-0.046	0.102	0.136			0.034	-0.04	-0.215	-0.175	-0.363	-0.095	-0.192	0.127
Rnf213	3.8%	RN213_MOUSE	14	18	E3 ubiquitin-protein ligase RNF213 OS=Mus musculus GN=Rnf213 PE=1 SV=2	664125	E9Q555			16260	16560	18515	26985	13500	10320	21995	10834			15141	17882	14702	20925	10707	9981	17940	10770			0.099	-0.106	0.38	0.882	-0.048	-0.375	0.45	-0.427			-0.004	0.004	0.047	0.514	-0.383	-0.423	0.156	-0.436
Rnh1	38.4%	RINI_MOUSE	9	12	Ribonuclease inhibitor OS=Mus musculus GN=Rnh1 PE=1 SV=1	56536	Q91VI7	NP_001165571	107702	48090	36110	82350	75170	60710	48680	63130	36980			44781	38994	65389	58286	48149	47080	51490	36758			0.174	-0.198	0.562	0.732	0.412	0.439	0.608	-0.138			0.071	-0.087	0.229	0.365	0.078	0.391	0.314	-0.146
Rpain	7.8%	RIP_MOUSE	1	1	RPA-interacting protein OS=Mus musculus GN=Rpain PE=1 SV=1	27399	Q9CWY9	NP_001239342	69723	1933	1988	4662	4675	6067	8813	8107	6386			1799	2147	3703	3624	4811	8523	6612	6347			-0.02	0.02	1.25	1.254	1.63	2.168	2.048	1.704			-0.123	0.131	0.917	0.887	1.295	2.12	1.754	1.695
Rpl10a	13.4%	RL10A_MOUSE	3	4	60S ribosomal protein L10a OS=Mus musculus GN=Rpl10a PE=1 SV=3	32405	P53026			120100	97960	176800	166750	183650	88180	98485	58975			111836	105783	140387	129297	145650	85283	80327	58621			0.14	-0.157	0.567	0.508	0.699	-0.305	-0.15	-0.885			0.038	-0.046	0.234	0.141	0.365	-0.353	-0.444	-0.894
Rpl10l	5.1%	RL10L_MOUSE	1	1	60S ribosomal protein L10-like OS=Mus musculus GN=Rpl10l PE=2 SV=1	30727	P86048	NP_001156405	238217	91420	71940	102000	103200	94750	75110	107600	109200			85130	77685	80992	80021	75145	72643	87762	108545			0.163	-0.183	0.321	0.337	0.214	-0.121	0.398	0.419			0.06	-0.072	-0.012	-0.03	-0.12	-0.169	0.104	0.41
Rpl11	18.5%	RL11_MOUSE	3	4	60S ribosomal protein L11 OS=Mus musculus GN=Rpl11 PE=1 SV=4	24364	Q9CXW4	NP_080195	67025	98560	85890	112500	132600	121800	67815	67570	69705			91778	92749	89330	102817	96597	65588	55111	69286			0.139	-0.156	0.23	0.467	0.344	-0.547	-0.506	-0.539			0.036	-0.045	-0.103	0.1	0.01	-0.595	-0.8	-0.548
Rpl12	40%	RL12_MOUSE	4	13	60S ribosomal protein L12 OS=Mus musculus GN=Rpl12 PE=1 SV=2	21631	P35979	NP_033102	269261	73360	58695	99605	95375	125175	61612	75388	45915			68311	63382	79090	73953	99275	59589	61488	45639			0.121	-0.12	0.359	0.26	0.612	-0.088	0.148	-0.528			0.018	-0.01	0.026	-0.106	0.279	-0.136	-0.146	-0.537
Rpl13	4.7%	RL13_MOUSE	1	3	60S ribosomal protein L13 OS=Mus musculus GN=Rpl13 PE=1 SV=3	30306	P47963	NP_058018	270106	107900	96750	178700	160200	204200	58950	57660	43440			100475	104477	141895	124218	161948	57014	47029	43179			0.104	-0.113	0.811	0.681	0.963	-0.759	-0.778	-1.238			0.002	-0.002	0.478	0.314	0.628	-0.807	-1.072	-1.247
Rpl13a	9.4%	RL13A_MOUSE	2	2	60S ribosomal protein L13a OS=Mus musculus GN=Rpl13a PE=1 SV=4	30209	P19253	NP_033464	22121	66645	55810	87970	85905	70590	47655	46135	28535			62058	60266	69853	66611	55985	46089	37629	28364			0.108	-0.128	0.528	0.493	0.212	-0.355	-0.449	-1.099			0.006	-0.016	0.195	0.127	-0.123	-0.403	-0.743	-1.107
Rpl14	5.5%	RL14_MOUSE	1	1	60S ribosomal protein L14 OS=Mus musculus GN=Rpl14 PE=1 SV=3	32601	Q9CR57	NP_080250	67115	57840	57470	106800	93860	99620	53370	47940	38370			53860	62060	84804	72778	79007	51617	39101	38140			0.005	-0.005	0.889	0.703	0.789	-0.111	-0.266	-0.587			-0.098	0.106	0.557	0.336	0.455	-0.16	-0.56	-0.596
Rpl15	25%	RL15_MOUSE	5	9	60S ribosomal protein L15 OS=Mus musculus GN=Rpl15 PE=2 SV=4	28370	Q9CZM2	NP_079862	66480	118600	118500	173400	170900	167800	85010	81070	59840			110439	127964	137687	132514	133080	82218	66123	59481			0.041	-0.042	0.676	0.555	0.501	-0.426	-0.548	-0.986			-0.062	0.069	0.344	0.188	0.167	-0.474	-0.842	-0.995
Rpl17	6%	RL17_MOUSE	1	1	60S ribosomal protein L17 OS=Mus musculus GN=Rpl17 PE=1 SV=3	27825	Q9CPR4			91740	62400	162400	164000	82680	46900	40550	37160			85428	67383	128953	127165	65572	45359	33074	36937			0.251	-0.305	1.075	1.089	0.101	-0.717	-0.926	-1.052			0.149	-0.194	0.743	0.722	-0.233	-0.765	-1.22	-1.061
Rpl18	13.8%	RL18_MOUSE	2	3	60S ribosomal protein L18 OS=Mus musculus GN=Rpl18 PE=1 SV=3	26501	P35980	NP_033103	19899	105050	85935	160725	151175	111980	79110	63088	49660			97822	92798	127623	117221	88809	76511	51456	49362			0.142	-0.158	0.772	0.682	0.244	-0.318	-0.7	-0.995			0.039	-0.047	0.439	0.315	-0.091	-0.366	-0.994	-1.004
Rpl18a	12.5%	RL18A_MOUSE	2	2	60S ribosomal protein L18a OS=Mus musculus GN=Rpl18a PE=1 SV=1	25129	P62717	NP_084027	76808	59425	44485	65020	53645	64985	37830	53750	27920			55335	48038	51629	41595	51539	36587	43840	27753			0.179	-0.205	0.414	0.322	0.482	-0.332	0.062	-0.645			0.076	-0.094	0.082	-0.046	0.148	-0.38	-0.232	-0.654
Rpl19	8.7%	RL19_MOUSE	1	2	60S ribosomal protein L19 OS=Mus musculus GN=Rpl19 PE=1 SV=1	31128	P84099	NP_033104	19921	36955	31345	47570	41820	40885	32760	42870	27065			34412	33848	37773	32428	32426	31684	34966	26902			0.107	-0.117	0.48	0.298	0.273	-0.05	0.343	-0.349			0.004	-0.006	0.147	-0.069	-0.062	-0.098	0.049	-0.357
Rpl21	20.6%	RL21_MOUSE	2	3	60S ribosomal protein L21 OS=Mus musculus GN=Rpl21 PE=1 SV=3	24336	O09167			60102	49122	77865	72015	65960	44358	60525	37820			55967	53045	61828	55840	52313	42900	49366	37593			0.164	-0.19	0.585	0.468	0.366	-0.234	0.089	-0.53			0.061	-0.079	0.252	0.101	0.032	-0.282	-0.205	-0.538
Rpl23	30.7%	RL23_MOUSE	3	4	60S ribosomal protein L23 OS=Mus musculus GN=Rpl23 PE=1 SV=1	18637	P62830	NP_075029	100044627	60020	54780	118000	92150	83800	34400	38000	37460			55890	59155	93696	71453	66461	33270	30994	37235			0.064	-0.067	1.04	0.683	0.546	-0.942	-0.654	-1.004			-0.038	0.043	0.707	0.316	0.211	-0.99	-0.948	-1.012
Rpl23a	21.2%	RL23A_MOUSE	4	4	60S ribosomal protein L23a OS=Mus musculus GN=Rpl23a PE=1 SV=1	24788	P62751	NP_997406	268449	112575	105775	58380	101375	57125	121150	157200	97990			104828	114223	46356	78606	45305	117170	128216	97402			0.042	-0.044	-0.584	-0.04	-0.664	0.365	0.635	0.055			-0.061	0.067	-0.918	-0.408	-0.999	0.317	0.34	0.047
Rpl24	19.1%	RL24_MOUSE	3	4	60S ribosomal protein L24 OS=Mus musculus GN=Rpl24 PE=1 SV=2	24298	Q8BP67	NP_077180	68193	72160	68435	124430	99680	90960	44770	56650	22255			67195	73900	98802	77291	72139	43300	46206	22121			0.2	-0.233	0.577	0.6	0.462	-0.001	-0.204	-0.614			0.097	-0.122	0.244	0.233	0.128	-0.049	-0.498	-0.622
Rpl27	23.5%	RL27_MOUSE	2	3	60S ribosomal protein L27 OS=Mus musculus GN=Rpl27 PE=1 SV=2	21288	P61358	NP_035419	108167922	116752	89495	114900	110760	144855	82375	83435	59528			108719	96642	91236	85882	114883	79669	68052	59171			0.18	-0.206	0.16	0.138	0.478	-0.299	-0.253	-0.73			0.077	-0.095	-0.172	-0.229	0.143	-0.347	-0.547	-0.738
Rpl27a	35.8%	RL27A_MOUSE	6	9	60S ribosomal protein L27a OS=Mus musculus GN=Rpl27a PE=1 SV=5	21063	P14115	NP_036105	26451	111300	95585	54555	106160	63805	106055	121250	72680			103641	103219	43319	82316	50603	102571	98894	72243			0.106	-0.116	-1.498	-0.304	-0.739	0.892	1	-0.013			0.004	-0.005	-1.83	-0.67	-1.073	0.844	0.706	-0.023
Rpl28	5.1%	RL28_MOUSE	1	1	60S ribosomal protein L28 OS=Mus musculus GN=Rpl28 PE=1 SV=2	19218	P41105	NP_033107	19943	288500	280500	130500	170800	155000	536500	372400	517300			268647	302901	103622	132437	122928	518877	303739	514194			0.02	-0.02	-1.124	-0.736	-0.876	0.915	0.388	0.863			-0.083	0.09	-1.457	-1.103	-1.211	0.867	0.094	0.854
Rpl30	13.9%	RL30_MOUSE	1	5	60S ribosomal protein L30 OS=Mus musculus GN=Rpl30 PE=1 SV=2	16384	P62889	NP_001156957	19946	42050	36890	56540	71950	77660	29970	24500	19590			39156	39836	44895	55790	61591	28986	19983	19473			0.101	-0.108	0.535	0.663	0.934	-0.315	-0.367	-0.863			-0.002	0.002	0.203	0.296	0.599	-0.363	-0.661	-0.871
Rpl31	18.4%	RL31_MOUSE	2	3	60S ribosomal protein L31 OS=Mus musculus GN=Rpl31 PE=1 SV=1	18350	P62900	NP_001239147	114641	14728	13706	22141	21912	24695	8208	8140	7300			13715	14800	17581	16991	19585	7939	6639	7256			0.042	-0.05	0.452	0.504	0.658	-0.809	-0.731	-1.109			-0.06	0.06	0.119	0.138	0.323	-0.858	-1.025	-1.117
Rpl32	9.6%	RL32_MOUSE	1	1	60S ribosomal protein L32 OS=Mus musculus GN=Rpl32 PE=1 SV=2	20318	P62911	NP_742083	19951	103300	77870	125800	127200	133400	70330	64270	57750			96191	84089	99890	98630	105798	68020	52421	57403			0.189	-0.218	0.474	0.49	0.558	-0.365	-0.495	-0.649			0.087	-0.107	0.141	0.123	0.224	-0.413	-0.789	-0.658
Rpl35	18.7%	RL35_MOUSE	2	5	60S ribosomal protein L35 OS=Mus musculus GN=Rpl35 PE=1 SV=1	20960	Q6ZWV7	NP_079868	66489	91902	80530	68062	82365	64212	86065	100938	202745			85579	86961	54044	63865	50927	83238	82328	201528			0.096	-0.103	-0.332	-0.129	-0.388	-0.002	0.108	1.126			-0.008	0.009	-0.664	-0.496	-0.724	-0.05	-0.186	1.117
Rpl37a	32.6%	RL37A_MOUSE	2	4	60S ribosomal protein L37a OS=Mus musculus GN=Rpl37a PE=1 SV=2	14163	P61514	NP_033110	19981	110360	95172	138425	145600	108072	92598	117042	108105			102765	102774	109915	112898	85710	89556	95463	107456			0.1	-0.11	0.478	0.554	0.078	-0.253	0.028	-0.312			-0.002	0.001	0.146	0.186	-0.257	-0.301	-0.266	-0.321
Rpl39	19.6%	RL39_MOUSE	1	2	60S ribosomal protein L39 OS=Mus musculus GN=Rpl39 PE=1 SV=2	8694	P62892	NP_080331	67248	104800	92200	108205	107660	93515	110855	115540	93075			97588	99564	85919	83480	74165	107214	94238	92517			0.108	-0.121	0.181	0.092	-0.028	0.159	0.256	-0.057			0.005	-0.01	-0.151	-0.275	-0.362	0.111	-0.038	-0.065
Rpl4	22.9%	RL4_MOUSE	8	11	60S ribosomal protein L4 OS=Mus musculus GN=Rpl4 PE=1 SV=3	60471	Q9D8E6	NP_077174	67891	62280	57435	109850	102582	66585	46610	44325	36362			57995	62022	87227	79541	52808	45079	36152	36144			0.082	-0.088	0.929	0.867	0.269	-0.302	-0.42	-0.754			-0.021	0.024	0.595	0.5	-0.065	-0.35	-0.714	-0.763
Rpl6	16.9%	RL6_MOUSE	4	5	60S ribosomal protein L6 OS=Mus musculus GN=Rpl6 PE=1 SV=3	45233	P47911	NP_035420	19988	43830	35731	72295	73392	68525	30354	38901	28121			40814	38585	57405	56909	54346	29357	31729	27952			0.132	-0.146	0.76	0.755	0.742	-0.346	-0.038	-0.344			0.029	-0.035	0.426	0.388	0.408	-0.395	-0.332	-0.351
Rpl7	20%	RL7_MOUSE	4	5	60S ribosomal protein L7 OS=Mus musculus GN=Rpl7 PE=1 SV=2	41311	P14148	NP_035421	19989	57518	51880	71840	75008	84235	55280	40032	35780			53559	56023	57044	58160	66805	53464	32652	35565			0.098	-0.106	0.732	0.65	0.503	-0.442	-0.456	-1.032			-0.005	0.005	0.399	0.283	0.169	-0.49	-0.75	-1.042
Rpl7a	30.8%	RL7A_MOUSE	8	10	60S ribosomal protein L7a OS=Mus musculus GN=Rpl7a PE=1 SV=2	39296	P12970	NP_038749	27176	95060	78972	117400	107300	192800	53255	54628	41840			88518	85279	93220	83199	152907	51506	44556	41588			0.09	-0.096	0.436	0.232	1.063	-0.512	-0.574	-1.02			-0.013	0.015	0.103	-0.134	0.728	-0.561	-0.868	-1.029
Rpl8	8.9%	RL8_MOUSE	2	2	60S ribosomal protein L8 OS=Mus musculus GN=Rpl8 PE=1 SV=2	34423	P62918	NP_036183	26961	134735	123480	168960	173950	146990	116580	111110	116350			125463	133341	134162	134881	116575	112750	90624	115651			0.072	-0.076	0.386	0.456	0.167	-0.198	-0.244	-0.372			-0.031	0.035	0.054	0.089	-0.167	-0.246	-0.538	-0.38
Rpl9	22.4%	RL9_MOUSE	3	5	60S ribosomal protein L9 OS=Mus musculus GN=Rpl9 PE=2 SV=2	26107	P51410	NP_035422	20005	91985	63180	123700	110460	114760	77030	79415	62815			85654	68226	98223	85651	91014	74500	64773	62438			0.241	-0.289	0.72	0.58	0.568	-0.005	0.048	-0.135			0.138	-0.178	0.387	0.213	0.234	-0.053	-0.246	-0.144
Rplp0	20.5%	RLA0_MOUSE	3	8	60S acidic ribosomal protein P0 OS=Mus musculus GN=Rplp0 PE=1 SV=3	38949	P14869	NP_031501	11837	103400	66660	143000	149600	150400	53320	44570	37670			96284	71984	113547	115999	119280	51568	36353	37444			0.105	-0.114	0.694	0.672	0.823	-0.462	-0.29	-0.726			0.002	-0.003	0.361	0.305	0.488	-0.51	-0.585	-0.734
Rplp1	51.8%	RLA1_MOUSE	2	4	60S acidic ribosomal protein P1 OS=Mus musculus GN=Rplp1 PE=1 SV=1	13415	P47955	NP_061341	56040	34950	27515	48512	51852	41362	28928	36200	27552			32545	29712	38520	40206	32804	27977	29526	27387			0.162	-0.186	0.653	0.754	0.428	-0.138	0.202	-0.176			0.059	-0.076	0.321	0.387	0.094	-0.186	-0.092	-0.184
Rplp2	55.7%	RLA2_MOUSE	3	5	60S acidic ribosomal protein P2 OS=Mus musculus GN=Rplp2 PE=1 SV=3	14165	P99027	NP_080296	67186	41615	38420	54610	62360	65560	32460	41160	27420			38751	41489	43363	48354	51995	31393	33571	27255			0.103	-0.114	0.48	0.713	0.713	-0.271	0.066	-0.559			0	-0.003	0.147	0.346	0.379	-0.319	-0.228	-0.568
Rpn1	6.4%	RPN1_MOUSE	4	4	Dolichyl-diphosphooligosaccharide--protein glycosyltransferase subunit 1 OS=Mus musculus GN=Rpn1 PE=1 SV=1	78282	Q91YQ5	NP_598694	103963	18275	13455	16890	18260	16930	16985	19190	18300			17018	14530	13412	14158	13427	16427	15651	18190			0.18	-0.206	0.167	0.285	-0.027	0.135	0.255	0.128			0.077	-0.096	-0.165	-0.082	-0.362	0.087	-0.039	0.119
Rpn2	2.7%	RPN2_MOUSE	1	1	Dolichyl-diphosphooligosaccharide--protein glycosyltransferase subunit 2 OS=Mus musculus GN=Rpn2 PE=1 SV=1	76467	Q9DBG6	NP_062616	20014	30050	27540	36180	37870	35430	24790	34590	23740			27981	29739	28728	29364	28100	23976	28213	23597			0.062	-0.064	0.329	0.395	0.299	-0.216	0.265	-0.278			-0.041	0.047	-0.003	0.028	-0.035	-0.264	-0.029	-0.287
Rps10	23.6%	RS10_MOUSE	3	4	40S ribosomal protein S10 OS=Mus musculus GN=Rps10 PE=1 SV=1	22112	P63325	NP_080239	67097	62170	55410	83230	76980	97090	38420	40090	25150			57892	59835	66089	59690	77000	37158	32698	24999			0.081	-0.085	0.502	0.389	0.724	-0.614	-0.552	-1.225			-0.022	0.025	0.169	0.022	0.389	-0.662	-0.846	-1.234
Rps11	15.8%	RS11_MOUSE	2	3	40S ribosomal protein S11 OS=Mus musculus GN=Rps11 PE=1 SV=3	23632	P62281	NP_038753	27207	79385	71468	90845	100890	71384	79470	70510	96330			73922	77175	72135	78230	56613	76859	57510	95751			0.063	-0.066	0.236	0.294	-0.594	0.127	-0.566	0.246			-0.04	0.045	-0.097	-0.073	-0.929	0.079	-0.86	0.237
Rps12	36.4%	RS12_MOUSE	3	11	40S ribosomal protein S12 OS=Mus musculus GN=Rps12 PE=1 SV=2	18753	P63323			109300	94770	130800	138500	104500	96660	116400	130800			101779	102338	103860	107392	82878	93485	94939	130015			0.126	-0.138	0.204	0.316	0.053	0.247	0.356	0.358			0.023	-0.028	-0.128	-0.051	-0.281	0.199	0.062	0.35
Rps13	37.1%	RS13_MOUSE	7	8	40S ribosomal protein S13 OS=Mus musculus GN=Rps13 PE=1 SV=2	21566	P62301	NP_080809	68052	146950	123315	101500	115500	144300	144000	158900	170800			136838	133163	80595	89558	114442	139270	129604	169775			0.093	-0.1	-0.67	-0.365	0.265	0.262	0.044	0.619			-0.01	0.011	-1.003	-0.732	-0.07	0.214	-0.25	0.61
Rps14	15.9%	RS14_MOUSE	2	2	40S ribosomal protein S14 OS=Mus musculus GN=Rps14 PE=1 SV=3	19413	P62264	NP_065625	20044	110545	93005	128050	133600	151550	100775	91845	80515			102938	100432	101676	103593	120192	97465	74912	80031			0.12	-0.132	0.339	0.374	0.584	-0.165	-0.283	-0.459			0.018	-0.022	0.007	0.007	0.249	-0.212	-0.577	-0.467
Rps15	28.3%	RS15_MOUSE	2	11	40S ribosomal protein S15 OS=Mus musculus GN=Rps15 PE=1 SV=2	20925	P62843	NP_033117	20054	18528	13858	21700	23944	28792	23790	29260	37250			17254	14964	17231	18566	22835	23007	23865	37026			0.29	-0.418	0.692	0.818	1.028	0.754	0.955	1.215			0.187	-0.308	0.36	0.451	0.694	0.706	0.66	1.207
Rps15a	10.8%	RS15A_MOUSE	1	1	40S ribosomal protein S15a OS=Mus musculus GN=Rps15a PE=1 SV=2	17694	P62245	NP_733769	267019	25860	24040	44170	42950	49200	19980	32170	21690			24081	25959	35073	33303	39020	19324	26239	21560			0.052	-0.054	0.824	0.784	0.98	-0.32	0.367	-0.202			-0.051	0.057	0.491	0.417	0.645	-0.369	0.073	-0.211
Rps16	14.4%	RS16_MOUSE	2	4	40S ribosomal protein S16 OS=Mus musculus GN=Rps16 PE=1 SV=4	20445	P14131	NP_038675	20055	78555	68590	110660	108078	104642	53332	54715	54062			73149	74068	87869	83803	82990	51580	44626	53739			0.086	-0.092	0.642	0.568	0.524	-0.638	-0.501	-0.591			-0.017	0.019	0.309	0.202	0.189	-0.686	-0.795	-0.6
Rps17	65.2%	RS17_MOUSE	8	11	40S ribosomal protein S17 OS=Mus musculus GN=Rps17 PE=1 SV=2	18780	P63276	NP_033118	20068	79654	65778	107348	104288	107605	56152	59916	58299			74172	71031	85239	80864	85340	54308	48869	57950			0.062	-0.066	0.215	0.52	0.406	-0.187	-0.242	0.018			-0.04	0.046	-0.118	0.154	0.072	-0.235	-0.536	0.009
Rps18	37.5%	RS18_MOUSE	8	12	40S ribosomal protein S18 OS=Mus musculus GN=Rps18 PE=1 SV=3	21604	P62270	NP_035426	20084	181100	137250	250600	206900	250750	101498	84920	73465			168637	148211	198987	160429	198866	98164	69263	73024			0.062	-0.066	0.759	0.601	0.684	-0.893	-0.762	-1.207			-0.042	0.045	0.426	0.234	0.349	-0.941	-1.056	-1.216
Rps19	17.2%	RS19_MOUSE	3	4	40S ribosomal protein S19 OS=Mus musculus GN=Rps19 PE=1 SV=3	19742	Q9CZX8	NP_075622	20085	89630	86390	96840	103200	129200	85500	96125	101635			83462	93289	76895	80021	102467	82691	78403	101024			0.026	-0.027	0.025	0.093	0.554	0.092	0.275	0.349			-0.077	0.084	-0.308	-0.274	0.219	0.044	-0.019	0.34
Rps2	8.2%	RS2_MOUSE	2	3	40S ribosomal protein S2 OS=Mus musculus GN=Rps2 PE=1 SV=3	37226	P25444	NP_032529	16898	60192	54370	139312	106090	122228	23550	27405	18152			56050	58712	110620	82262	96937	22776	22352	18043			0.107	-0.118	1.318	0.97	1.1	-1.047	-0.854	-1.405			0.004	-0.008	0.986	0.603	0.765	-1.095	-1.148	-1.414
Rps20	22.7%	RS20_MOUSE	2	2	40S ribosomal protein S20 OS=Mus musculus GN=Rps20 PE=1 SV=1	16687	P60867	NP_080423	67427	130300	111785	165390	169145	165320	105160	113260	113630			121334	120712	131327	131154	131113	101706	92379	112948			0.122	-0.134	0.324	0.304	0.254	-0.284	-0.083	-0.312			0.02	-0.023	-0.009	-0.063	-0.081	-0.332	-0.377	-0.321
Rps23	16.1%	RS23_MOUSE	2	2	40S ribosomal protein S23 OS=Mus musculus GN=Rps23 PE=1 SV=3	20781	P62267	NP_077137	66475	29695	24375	62035	52755	35900	12170	12925	11700			27652	26322	49258	40905	28473	11771	10542	11629			0.11	-0.122	1.02	0.772	0.308	-1.026	-0.956	-1.075			0.007	-0.012	0.688	0.406	-0.027	-1.074	-1.25	-1.083
Rps24	11.3%	RS24_MOUSE	1	1	40S ribosomal protein S24 OS=Mus musculus GN=Rps24 PE=1 SV=1	20913	P62849	NP_035427	20088	49650	44430	78940	67500	75590	28740	32710	27680			46233	47978	62681	52340	59949	27797	26678	27514			0.078	-0.082	0.747	0.521	0.684	-0.711	-0.524	-0.765			-0.025	0.028	0.414	0.154	0.35	-0.759	-0.818	-0.774
Rps25	22.4%	RS25_MOUSE	4	5	40S ribosomal protein S25 OS=Mus musculus GN=Rps25 PE=1 SV=1	20207	P62852	NP_077228	75617	109535	102565	137700	144950	146050	65602	74248	48765			101998	110757	109339	112394	115831	63448	60559	48472			0.075	-0.08	0.646	0.603	0.58	-0.702	-0.627	-0.98			-0.028	0.032	0.313	0.236	0.247	-0.75	-0.921	-0.989
Rps26	13%	RS26_MOUSE	1	3	40S ribosomal protein S26 OS=Mus musculus GN=Rps26 PE=1 SV=3	16500	P62855	NP_038793	27370	39320	33930	76930	65920	39030	22090	28170	16960			36614	36640	61086	51114	30954	21364	22976	16857			0.121	-0.133	1.306	0.847	0.238	-0.729	-0.379	-1.154			0.019	-0.022	0.973	0.48	-0.096	-0.778	-0.673	-1.163
Rps27a	42.3%	RS27A_MOUSE	5	10	Ubiquitin-40S ribosomal protein S27a OS=Mus musculus GN=Rps27a PE=1 SV=2	24240	P62983	NP_001029037	78294	106300	103400	110000	127300	145000	83880	78580	72060			98986	111657	87344	98708	114998	81124	64092	71627			0.043	-0.044	0.494	0.547	0.468	-0.322	-0.24	-0.535			-0.06	0.067	0.161	0.18	0.133	-0.37	-0.534	-0.543
Rps27l	9.5%	RS27L_MOUSE	1	1	40S ribosomal protein S27-like OS=Mus musculus GN=Rps27l PE=1 SV=3	12334	Q6ZWY3	NP_080743	67941	124700	105400	176800	153300	124700	104300	108800	75750			116119	113818	140387	118867	98898	100874	88739	75295			0.116	-0.126	0.62	0.414	0.116	-0.142	-0.081	-0.603			0.013	-0.016	0.287	0.047	-0.218	-0.19	-0.375	-0.612
Rps28	17.4%	RS28_MOUSE	1	1	40S ribosomal protein S28 OS=Mus musculus GN=Rps28 PE=1 SV=1	8810	P62858	NP_058540	54127	78780	66620	66750	66890	93460	63970	76330	81760			73359	71941	53002	51866	74122	61869	62257	81270			0.116	-0.126	-0.123	-0.12	0.362	-0.185	0.07	0.169			0.013	-0.015	-0.456	-0.487	0.028	-0.233	-0.224	0.161
Rps29	46.4%	RS29_MOUSE	3	10	40S ribosomal protein S29 OS=Mus musculus GN=Rps29 PE=3 SV=2	8046	P62274	NP_033119	20090	633700	594150	1081550	1035850	681900	486700	511200	386700			590093	641600	858797	803192	540805	470712	416948	384378			0.061	-0.065	0.828	0.96	0.339	-1.167	-1.035	-1.266			-0.042	0.046	0.495	0.593	0.005	-1.215	-1.329	-1.275
Rps3	37.9%	RS3_MOUSE	7	12	40S ribosomal protein S3 OS=Mus musculus GN=Rps3 PE=1 SV=1	31641	P62908	NP_036182	27050	84890	76630	121100	109100	130000	71140	77870	76180			79048	82751	96158	84596	103101	68804	63512	75723			0.113	-0.122	0.312	0.312	0.334	-0.094	-0.015	-0.096			0.01	-0.011	-0.02	-0.055	0	-0.142	-0.309	-0.104
Rps3a	8.7%	RS3A_MOUSE	3	3	40S ribosomal protein S3a OS=Mus musculus GN=Rps3a PE=1 SV=3	39031	P97351	NP_058655	20091	61960	54590	73060	76320	73500	48580	51620	48430			57697	58950	58013	59178	58292	46985	42103	48139			0.051	-0.053	0.309	0.464	0.447	-0.291	0.07	-0.13			-0.052	0.058	-0.024	0.097	0.113	-0.339	-0.224	-0.139
Rps4x	21.3%	RS4X_MOUSE	4	7	40S ribosomal protein S4, X isoform OS=Mus musculus GN=Rps4x PE=1 SV=2	36224	P62702	NP_033120	20102	122788	102328	171450	176575	165225	88932	86515	72230			114337	110499	136138	136916	131038	86012	70563	71796			0.127	-0.14	0.744	0.785	0.657	-0.326	-0.268	-0.576			0.024	-0.03	0.411	0.418	0.322	-0.374	-0.562	-0.585
Rps5	12.3%	RS5_MOUSE	2	3	40S ribosomal protein S5 OS=Mus musculus GN=Rps5 PE=1 SV=3	26942	P97461	NP_033121	20103	55222	43320	72210	75190	61974	47725	49656	46914			51422	46779	57338	58302	49151	46158	40501	46632			0.086	-0.1	0.277	0.413	0.074	0.074	-0.091	-0.208			-0.016	0.01	-0.056	0.046	-0.261	0.026	-0.385	-0.217
Rps6	19.7%	RS6_MOUSE	4	6	40S ribosomal protein S6 OS=Mus musculus GN=Rps6 PE=1 SV=1	37313	P62754	NP_033122	105244208	127392	117105	139550	189150	103712	95768	105615	163552			118626	126458	110809	146666	82253	92622	86142	162571			0.04	-0.045	0.43	0.646	-0.104	-0.324	-0.199	0.395			-0.063	0.066	0.097	0.278	-0.439	-0.372	-0.494	0.387
Rps7	17%	RS7_MOUSE	2	2	40S ribosomal protein S7 OS=Mus musculus GN=Rps7 PE=2 SV=1	27842	P62082	NP_035430	20115	36370	27180	63805	66680	59610	31955	43695	32835			33866	29351	50664	51703	47275	30905	35639	32637			0.199	-0.231	1.116	1.168	0.972	-0.157	0.378	-0.132			0.096	-0.12	0.783	0.802	0.637	-0.206	0.084	-0.141
Rps8	32.2%	RS8_MOUSE	5	5	40S ribosomal protein S8 OS=Mus musculus GN=Rps8 PE=1 SV=2	31808	P62242	NP_033124	20116	123900	97690	133200	125500	102000	101700	98430	74070			115374	105492	105767	97312	80895	98360	80282	73626			0.121	-0.133	0.387	0.223	0.148	-0.06	0.078	-0.257			0.019	-0.022	0.054	-0.144	-0.187	-0.109	-0.216	-0.266
Rps9	22.7%	RS9_MOUSE	4	6	40S ribosomal protein S9 OS=Mus musculus GN=Rps9 PE=1 SV=3	27218	Q6ZWN5	NP_084043	76846	98920	81032	134200	136525	113640	75310	73625	56052			92112	87504	106560	105861	90127	72836	60050	55716			0.1	-0.109	0.601	0.609	0.357	-0.354	-0.384	-0.691			-0.002	0.002	0.268	0.242	0.023	-0.402	-0.678	-0.699
Rpsa	5.4%	RSSA_MOUSE	1	1	40S ribosomal protein SA OS=Mus musculus GN=Rpsa PE=1 SV=4	35681	P14206	NP_035159	16785	25360	23690	40380	29880	46420	20620	29590	27740			23615	25582	32063	23169	36815	19942	24135	27573			0.048	-0.05	0.719	0.285	0.92	-0.25	0.271	0.178			-0.055	0.061	0.387	-0.082	0.586	-0.298	-0.023	0.169
Rrbp1	1.2%	RRBP1_MOUSE	2	3	Ribosome-binding protein 1 OS=Mus musculus GN=Rrbp1 PE=1 SV=2	227314	Q99PL5	NP_077243	81910	45278	44652	39102	44152	34122	53752	49740	69512			42162	48219	31049	34236	27062	51986	40570	69095			0.008	-0.008	-0.196	-0.022	-0.396	0.261	0.148	0.63			-0.095	0.102	-0.53	-0.388	-0.731	0.212	-0.146	0.621
Rtcb	4.6%	RTCB_MOUSE	1	2	tRNA-splicing ligase RtcB homolog OS=Mus musculus GN=Rtcb PE=1 SV=1	63289	Q99LF4	NP_663397	28088	28150	20580	29825	33435	38315	26415	31870	31620			26213	22224	23683	25925	30387	25548	25994	31430			0.209	-0.244	0.289	0.457	0.64	0.116	0.384	0.362			0.106	-0.134	-0.044	0.09	0.305	0.068	0.09	0.353
Ryr2	0.4%	RYR2_MOUSE	1	12	Ryanodine receptor 2 OS=Mus musculus GN=Ryr2 PE=1 SV=1	641145	E9Q401	NP_076357	20191	83260	63025	98855	97990	89705	79215	92855	84830			77531	68058	78495	75981	71144	76612	75735	84321			0.172	-0.195	0.662	0.552	0.389	0.197	0.365	0.228			0.069	-0.084	0.329	0.185	0.054	0.149	0.071	0.219
S100a10	17.5%	S10AA_MOUSE	1	2	Protein S100-A10 OS=Mus musculus GN=S100a10 PE=1 SV=2	13813	P08207	NP_033138	20194	64810	62315	63380	69985	82025	62880	91220	44900			60350	67292	50327	54267	65053	60814	74402	44630			0.022	-0.026	-0.004	0.141	0.363	-0.013	0.522	-0.508			-0.08	0.085	-0.337	-0.226	0.029	-0.061	0.228	-0.517
S100a11	27.6%	S10AB_MOUSE	2	2	Protein S100-A11 OS=Mus musculus GN=S100a11 PE=1 SV=1	13309	P50543	NP_058020	20195	28630	22905	33960	32050	41705	23655	40675	46895			26661	24734	26965	24852	33076	22878	33175	46614			0.154	-0.172	0.448	0.364	0.739	-0.082	0.705	0.903			0.05	-0.06	0.116	-0.003	0.404	-0.13	0.411	0.895
S100a4	33.7%	S10A4_MOUSE	4	6	Protein S100-A4 OS=Mus musculus GN=S100a4 PE=1 SV=1	14692	P07091	NP_035441	20198	142600	125980	103280	101765	155600	182100	149750	140260			132787	136041	82008	78908	123404	176119	122140	139417			0.12	-0.135	-0.366	-0.199	0.209	0.436	0.294	0.09			0.018	-0.024	-0.699	-0.566	-0.126	0.388	0	0.081
S100a6	19.1%	S10A6_MOUSE	1	1	Protein S100-A6 OS=Mus musculus GN=S100a6 PE=1 SV=3	12622	P14069	NP_035443	20200	11180	5536	25130	30940	14790	26460	27410	13160			10411	5977	19955	23990	11730	25591	22356	13081			0.42	-0.594	1.588	1.888	0.823	1.663	1.713	0.655			0.317	-0.483	1.255	1.521	0.489	1.614	1.419	0.646
S100a8	73%	S10A8_MOUSE	3	8	Protein S100-A8 OS=Mus musculus GN=S100a8 PE=1 SV=3	12178	P27005	NP_038678	20201	29920	25440	37010	35160	49230	32300	40590	43330			27861	27472	29388	27264	39044	31239	33106	43070			0.276	-0.342	0.434	0.185	0.526	0.205	0.635	0.791			0.173	-0.231	0.101	-0.182	0.192	0.157	0.341	0.782
S100a9	30.1%	S10A9_MOUSE	3	6	Protein S100-A9 OS=Mus musculus GN=S100a9 PE=1 SV=3	15961	P31725	NP_001268781	20202	123400	97260	90610	143500	104600	152300	151100	276300			114908	105027	71948	111269	82956	147297	123241	274641			0.143	-0.159	-0.445	0.131	-0.412	-0.019	0.425	1.229			0.04	-0.048	-0.778	-0.236	-0.746	-0.067	0.131	1.22
Saa1	7.4%	SAA1_MOUSE	1	1	Serum amyloid A-1 protein OS=Mus musculus GN=Saa1 PE=1 SV=2	15709	P05366	NP_033143	20208	13390	11410	31300	16480	16870	4129	3046	1143			12468	12322	24854	12779	13379	3994	2484	1137			0.111	-0.12	1.336	0.41	0.444	-1.586	-2.025	-3.439			0.008	-0.009	1.003	0.043	0.11	-1.635	-2.319	-3.448
Samhd1	16.7%	SAMH1_MOUSE	7	12	Deoxynucleoside triphosphate triphosphohydrolase SAMHD1 OS=Mus musculus GN=Samhd1 PE=1 SV=2	86808	Q60710	NP_001132992	56045	33040	27660	36250	37650	30670	30490	40900	34640			30766	29869	28784	29193	24324	29488	33359	34432			0.118	-0.129	0.216	0.365	-0.203	-0.107	0.582	0.288			0.015	-0.018	-0.117	-0.002	-0.537	-0.155	0.288	0.279
Scin	2.9%	ADSV_MOUSE	1	1	Adseverin OS=Mus musculus GN=Scin PE=1 SV=3	93034	Q60604	NP_001139668	20259	44760	38290	24600	19010	179300	14970	20880	16740			41680	41348	19533	14740	142200	14478	17031	16640			0.108	-0.117	-0.755	-1.127	2.11	-1.472	-0.992	-1.311			0.005	-0.006	-1.088	-1.494	1.776	-1.52	-1.286	-1.319
Scn5a	1.3%	SCN5A_MOUSE	1	1	Sodium channel protein type 5 subunit alpha OS=Mus musculus GN=Scn5a PE=1 SV=2	248960	Q9JJV9	NP_001240789	20271	7631	17730	27230	35450	27170	28500	30320	46410			7107	19146	21622	27487	21548	27564	24730	46131			-0.733	0.484	1.103	1.483	1.099	1.168	1.258	1.872			-0.836	0.594	0.77	1.116	0.765	1.12	0.964	1.863
Sdcbp	14.4%	SDCB1_MOUSE	3	4	Syntenin-1 OS=Mus musculus GN=Sdcbp PE=1 SV=1	36941	O08992	NP_001091697	53378	48320	45580	52410	46200	59690	50440	48270	36540			44995	49220	41615	35823	47340	48784	39371	36321			0.041	-0.043	0.717	0.187	0.571	0.103	0.04	-0.362			-0.061	0.068	0.384	-0.18	0.237	0.055	-0.254	-0.37
Sdhb	5%	SDHB_MOUSE	1	2	Succinate dehydrogenase [ubiquinone] iron-sulfur subunit, mitochondrial OS=Mus musculus GN=Sdhb PE=1 SV=1	38549	Q9CQA3	NP_075863	67680	21190	19770	16315	17100	19570	22690	23180	38490			19732	21348	12955	13260	15521	21944	18906	38259			0.061	-0.069	-0.359	-0.239	-0.044	0.161	0.201	0.925			-0.042	0.042	-0.691	-0.606	-0.378	0.112	-0.093	0.916
Sec13	7.1%	SEC13_MOUSE	1	2	Protein SEC13 homolog OS=Mus musculus GN=Sec13 PE=1 SV=3	40181	Q9D1M0	NP_077168	110379	46285	35095	60195	54800	56695	45485	55020	39675			43100	37898	47797	42492	44964	43991	44875	39437			0.185	-0.214	0.565	0.43	0.479	0.157	0.433	-0.038			0.082	-0.103	0.232	0.063	0.144	0.109	0.139	-0.047
Sec23b	3.5%	SC23B_MOUSE	2	2	Protein transport protein Sec23B OS=Mus musculus GN=Sec23b PE=1 SV=1	94398	Q9D662	NP_001239472	27054	11694	6316	14766	15681	15140	12172	14949	10152			10889	6821	11725	12158	12007	11773	12193	10090			0.454	-0.707	0.726	0.833	0.807	0.514	0.896	0.396			0.352	-0.596	0.394	0.466	0.473	0.466	0.602	0.388
Sec31a	1.5%	SC31A_MOUSE	1	1	Protein transport protein Sec31A OS=Mus musculus GN=Sec31a PE=1 SV=2	148949	Q3UPL0	NP_081245	69162	56830	50850	52800	55910	41580	57880	59840	53330			52919	54911	41926	43352	32976	55979	48807	53010			0.078	-0.082	-0.028	0.054	-0.373	0.104	0.152	-0.014			-0.025	0.028	-0.361	-0.313	-0.707	0.056	-0.142	-0.022
Sept2	20.5%	SEPT2_MOUSE	5	5	Septin-2 OS=Mus musculus GN=Sept2 PE=1 SV=2	47915	P42208	NP_001153189	18000	43260	37040	38610	33560	112700	30920	39510	31650			40283	39998	30658	26022	89382	29904	32226	31460			0.108	-0.116	0.044	0.083	1.043	-0.377	0.059	-0.343			0.005	-0.005	-0.289	-0.284	0.709	-0.425	-0.235	-0.352
Sept7	6%	SEPT7_MOUSE	2	4	Septin-7 OS=Mus musculus GN=Sept7 PE=1 SV=1	61631	O55131	NP_001192296	235072	50480	42305	45625	44960	100120	38775	43800	36620			47006	45684	36228	34862	79403	37502	35724	36399			0.148	-0.167	-0.013	0.031	0.854	-0.148	0.025	-0.347			0.045	-0.057	-0.346	-0.336	0.521	-0.196	-0.27	-0.355
Serbp1	3.9%	PAIRB_MOUSE	1	1	Plasminogen activator inhibitor 1 RNA-binding protein OS=Mus musculus GN=Serbp1 PE=1 SV=2	53051	Q9CY58	NP_001107037	66870	33100	23920	42570	37440	31700	19780	28860	31550			30822	25830	33802	29031	25140	19130	23538	31361			0.215	-0.253	0.578	0.393	0.153	-0.527	0.018	0.146			0.113	-0.142	0.246	0.026	-0.181	-0.576	-0.276	0.137
Serpinb6	14.6%	SPB6_MOUSE	4	14	Serpin B6 OS=Mus musculus GN=Serpinb6 PE=1 SV=1	50476	Q60854	NP_001157590	20719	62875	54925	59430	66910	45180	118165	81640	59985			58549	59312	47190	51881	35831	114283	66589	59625			0.065	-0.069	-0.029	0.116	-0.381	1.171	0.265	-0.005			-0.038	0.042	-0.362	-0.25	-0.716	1.123	-0.029	-0.014
Serpinh1	54.7%	SERPH_MOUSE	16	26	Serpin H1 OS=Mus musculus GN=Serpinh1 PE=1 SV=3	54868	P19324	NP_001104513	12406	106350	78475	70898	85355	93065	123150	134350	194100			99031	84742	56295	66183	73809	119105	109580	192935			0.118	-0.128	-0.246	-0.16	0.011	0.332	0.349	0.808			0.014	-0.017	-0.579	-0.526	-0.323	0.282	0.055	0.799
Sestd1	1.6%	SESD1_MOUSE	1	2	SEC14 domain and spectrin repeat-containing protein 1 OS=Mus musculus GN=Sestd1 PE=1 SV=1	89922	Q80UK0	NP_780674	228071	16785	13279	17200	22925	12155	19115	27300	17035			15629	14340	13657	17775	9640	18487	22267	16933			0.189	-0.252	0.21	0.641	-0.282	0.384	0.895	0.181			0.086	-0.141	-0.122	0.274	-0.617	0.336	0.601	0.172
Sfxn1	10.6%	SFXN1_MOUSE	1	1	Sideroflexin-1 OS=Mus musculus GN=Sfxn1 PE=1 SV=3	38891	Q99JR1	NP_081600	14057	15110	6828	18340	19880	15920	11120	14700	19070			14070	7374	14563	15415	12626	10755	11989	18956			0.462	-0.684	0.742	0.858	0.537	0.02	0.422	0.798			0.359	-0.573	0.409	0.491	0.203	-0.028	0.128	0.789
Sh3bgrl	35.1%	SH3L1_MOUSE	3	6	SH3 domain-binding glutamic acid-rich-like protein OS=Mus musculus GN=Sh3bgrl PE=1 SV=1	14751	Q9JJU8	NP_064373	56726	73720	60400	82770	80830	96790	65990	73890	81740			68647	65224	65723	62675	76763	63823	60267	81249			0.091	-0.099	0.039	0.167	0.382	0.206	0.094	0.293			-0.012	0.012	-0.293	-0.2	0.048	0.157	-0.2	0.284
Sh3kbp1	2.7%	SH3K1_MOUSE	1	2	SH3 domain-containing kinase-binding protein 1 OS=Mus musculus GN=Sh3kbp1 PE=1 SV=1	93647	Q8R550	NP_001129199	58194	50585	47320	42560	40355	170200	30385	38550	42875			47104	51099	33794	31291	134983	29387	31442	42618			0.049	-0.052	-0.198	-0.276	1.8	-0.685	-0.345	-0.189			-0.054	0.059	-0.531	-0.643	1.465	-0.733	-0.639	-0.197
Shmt1	3.8%	GLYC_MOUSE	1	1	Serine hydroxymethyltransferase, cytosolic OS=Mus musculus GN=Shmt1 PE=1 SV=3	60013	P50431	NP_033197	20425	2314	1356	7835	8455	8614	2079	8159	6258			2155	1464	6221	6556	6831	2010	6654	6220			0.335	-0.436	2.094	2.204	2.231	0.18	2.153	1.77			0.232	-0.326	1.761	1.837	1.896	0.132	1.859	1.761
Siglec1	1.2%	SN_MOUSE	1	1	Sialoadhesin OS=Mus musculus GN=Siglec1 PE=1 SV=2	192937	Q62230	NP_035556	20612	50800	45410	62770	52090	107800	45710	45100	33630			47304	49037	49842	40390	85495	44208	36785	33428			0.079	-0.083	0.384	0.115	1.164	-0.074	-0.093	-0.516			-0.024	0.028	0.051	-0.252	0.83	-0.122	-0.387	-0.525
Skiv2l2	2.2%	SK2L2_MOUSE	1	1	Superkiller viralicidic activity 2-like 2 OS=Mus musculus GN=Skiv2l2 PE=1 SV=1	138296				11950	9368	17710	18830	17790	19920	21930	26140			11128	10116	14062	14601	14109	19265	17886	25982			0.165	-0.186	0.732	0.821	0.739	0.902	1.041	1.294			0.062	-0.075	0.4	0.454	0.405	0.854	0.747	1.285
Skp1	22.7%	SKP1_MOUSE	2	2	S-phase kinase-associated protein 1 OS=Mus musculus GN=Skp1 PE=1 SV=3	22956	Q9WTX5	NP_035673	21402	83565	81060	66215	60615	232600	55220	75925	55040			77815	87534	52577	47001	184472	53407	61927	54709			0.052	-0.055	-0.12	-0.348	1.598	-0.468	0.058	-0.472			-0.051	0.056	-0.452	-0.714	1.263	-0.517	-0.236	-0.48
Slc25a10	8.4%	DIC_MOUSE	1	1	Mitochondrial dicarboxylate carrier OS=Mus musculus GN=Slc25a10 PE=1 SV=2	35359	Q9QZD8	NP_038798	27376	14030	9967	16750	11040	14960	14770	22390	15950			13065	10763	13300	8560	11865	14285	18261	15854			0.226	-0.268	0.481	-0.12	0.318	0.3	0.9	0.411			0.123	-0.157	0.149	-0.487	-0.016	0.252	0.606	0.402
Slc25a12	4.1%	CMC1_MOUSE	1	2	Calcium-binding mitochondrial carrier protein Aralar1 OS=Mus musculus GN=Slc25a12 PE=1 SV=1	83172	Q8BH59	NP_766024	78830	20093	16534	27966	30075	26351	20188	32085	29768			18710	17854	22206	23320	20899	19525	26169	29589			0.126	-0.138	0.497	0.54	0.39	0.046	0.793	0.611			0.023	-0.027	0.164	0.173	0.056	-0.002	0.499	0.603
Slc25a13	2.7%	CMC2_MOUSE	1	1	Calcium-binding mitochondrial carrier protein Aralar2 OS=Mus musculus GN=Slc25a13 PE=1 SV=1	84673	Q9QXX4	NP_001171043	50799	6384	6380	7328	6684	7529	5745	10120	7060			5945	6890	5819	5183	5971	5556	8254	7018			0	0	0.199	0.067	0.238	-0.152	0.665	0.146			-0.102	0.11	-0.133	-0.3	-0.096	-0.2	0.371	0.137
Slc25a3	6.4%	MPCP_MOUSE	2	2	Phosphate carrier protein, mitochondrial OS=Mus musculus GN=Slc25a3 PE=1 SV=1	45563	Q8VEM8	NP_598429	18674	97002	83982	84640	119475	84210	82395	96665	144740			90328	90689	67208	92641	66786	79689	78843	143871			0.118	-0.128	0.504	0.907	0.354	0.208	0.532	1.01			0.014	-0.017	0.171	0.54	0.019	0.16	0.238	1.002
Slc25a4	10.4%	ADT1_MOUSE	3	4	ADP/ATP translocase 1 OS=Mus musculus GN=Slc25a4 PE=1 SV=4	38611	P48962	NP_031476	11739	167000	149400	146700	191200	184000	137100	148600	215800			155508	161331	116487	148255	145927	132597	121202	214505			0.078	-0.083	0.021	0.256	0.26	-0.207	-0.001	0.433			-0.025	0.028	-0.311	-0.111	-0.075	-0.255	-0.295	0.425
Slc25a5	22.5%	ADT2_MOUSE	7	12	ADP/ATP translocase 2 OS=Mus musculus GN=Slc25a5 PE=1 SV=3	38867	P51881	NP_031477	11740	216700	186100	188600	214200	238500	123600	220900	288300			201787	200962	149756	166090	189152	119540	180172	286569			0.106	-0.114	-0.078	0.107	0.403	-0.275	0.06	0.525			0.003	-0.003	-0.411	-0.26	0.069	-0.323	-0.234	0.516
Slc39a8	1.5%	S39A8_MOUSE	1	1	Zinc transporter ZIP8 OS=Mus musculus GN=Slc39a8 PE=2 SV=1	54573	Q91W10	NP_001128621	67547	231700	250600	180000	173500	277500	184500	294700	372100			215756	270613	142928	134532	220081	178440	240365	369866			-0.058	0.055	-0.422	-0.475	0.203	-0.386	0.289	0.626			-0.161	0.166	-0.755	-0.842	-0.132	-0.434	-0.005	0.617
Slc3a2	4.6%	4F2_MOUSE	2	3	4F2 cell-surface antigen heavy chain OS=Mus musculus GN=Slc3a2 PE=1 SV=1	65060	P10852	NP_001154885	17254	12482	10223	16644	18071	12851	8712	11330	6552			11623	11040	13216	14011	10192	8425	9241	6513			0.219	-0.355	0.662	0.677	0.35	-0.268	-0.068	-1.047			0.116	-0.244	0.329	0.31	0.017	-0.316	-0.362	-1.055
Snap23	6.7%	SNP23_MOUSE	1	1	Synaptosomal-associated protein 23 OS=Mus musculus GN=Snap23 PE=1 SV=1	27198	O09044	NP_001171263	20619	23260	21300	17800	17250	16760	18290	35940	18200			21659	23001	14134	13376	13293	17690	29314	18090			0.062	-0.065	-0.324	-0.369	-0.411	-0.285	0.69	-0.292			-0.041	0.046	-0.657	-0.736	-0.745	-0.333	0.396	-0.3
Snd1	6.3%	SND1_MOUSE	4	6	Staphylococcal nuclease domain-containing protein 1 OS=Mus musculus GN=Snd1 PE=1 SV=1	116000	Q78PY7	NP_062750	56463	67830	61410	75900	83580	76805	73015	82860	71050			63163	66314	60268	64808	60914	70617	67583	70623			0.092	-0.1	0.119	0.294	0.077	0.146	0.336	0.186			-0.011	0.011	-0.214	-0.072	-0.257	0.098	0.042	0.177
Snrpd1	16.8%	SMD1_MOUSE	1	3	Small nuclear ribonucleoprotein Sm D1 OS=Mus musculus GN=Snrpd1 PE=1 SV=1	15794	P62315	NP_033252	20641	25420	15420	38350	35840	80770	30650	34620	24880			23670	16652	30451	27791	64058	29643	28238	24731			0.316	-0.405	0.827	0.693	1.865	0.516	0.67	0.202			0.213	-0.294	0.494	0.326	1.53	0.468	0.376	0.194
Snx9	7.1%	SNX9_MOUSE	2	2	Sorting nexin-9 OS=Mus musculus GN=Snx9 PE=1 SV=1	77673	Q91VH2	NP_079940	66616	33560	31610	22310	14390	176650	10520	21215	8836			31251	34134	17716	11158	140098	10174	17302	8782			0.04	-0.041	-0.542	-1.235	2.443	-1.626	-0.617	-1.958			-0.063	0.07	-0.875	-1.602	2.109	-1.674	-0.912	-1.967
Soat1	3%	SOAT1_MOUSE	1	1	Sterol O-acyltransferase 1 OS=Mus musculus GN=Soat1 PE=1 SV=2	70285	Q61263	NP_033256	20652	34740	35400	45420	45860	44830	47970	46680	44550			32350	38227	36066	35559	35554	46395	38073	44282			-0.014	0.014	0.373	0.387	0.354	0.452	0.413	0.345			-0.116	0.124	0.04	0.02	0.02	0.404	0.119	0.337
Sorcs1	0.6%	SORC1_MOUSE	1	2	VPS10 domain-containing receptor SorCS1 OS=Mus musculus GN=Sorcs1 PE=1 SV=1	143065	Q9JLC4			599750	546450	306250	70920	2954500	72015	196400	72665			558478	590091	243176	54991	2343172	69649	160189	72229			0.057	-0.06	-0.877	-2.214	2.302	-2.855	-1.53	-2.851			-0.046	0.051	-1.209	-2.581	1.968	-2.903	-1.824	-2.86
Spata7	1.2%	SPAT7_MOUSE	1	1	Spermatogenesis-associated protein 7 homolog OS=Mus musculus GN=Spata7 PE=1 SV=1	76038	Q80VP2	NP_849245	104871	135000	125000	132700	140600	132000	112600	125100	138300			125710	134983	105369	109020	104688	108901	102035	137469			0.054	-0.057	0.03	0.113	0.022	-0.207	-0.055	0.089			-0.048	0.054	-0.303	-0.254	-0.312	-0.255	-0.349	0.081
Spcs2	18.1%	SPCS2_MOUSE	2	5	Signal peptidase complex subunit 2 OS=Mus musculus GN=Spcs2 PE=1 SV=1	30461	Q9CYN2	NP_079944	66624	21642	16016	21604	20324	19474	25726	24844	18346			20152	17293	17154	15760	15445	24881	20262	18235			0.089	-0.014	-0.482	-0.145	-0.281	0.303	0.16	0.022			-0.014	0.097	-0.815	-0.512	-0.615	0.254	-0.134	0.014
Sqrdl	3.6%	SQRD_MOUSE	1	2	Sulfide:quinone oxidoreductase, mitochondrial OS=Mus musculus GN=Sqrdl PE=1 SV=3	58268				28850	20680	33350	26520	55490	27365	29775	17800			26865	22331	26481	20563	44009	26466	24286	17692			0.219	-0.261	0.421	0.098	1.164	0.144	0.262	-0.477			0.117	-0.15	0.088	-0.269	0.829	0.096	-0.032	-0.485
Sqstm1	27.6%	SQSTM_MOUSE	6	13	Sequestosome-1 OS=Mus musculus GN=Sqstm1 PE=1 SV=1	53915	Q64337	NP_001277698	18412	51745	47090	119425	99840	47830	27780	24815	22390			48185	50851	94829	77415	37934	26867	20240	22255			0.12	-0.134	1.113	0.78	0.194	-0.548	-0.363	-0.96			0.018	-0.022	0.78	0.413	-0.141	-0.596	-0.656	-0.969
Srsf1	4%	SRSF1_MOUSE	1	1	Serine/arginine-rich splicing factor 1 OS=Mus musculus GN=Srsf1 PE=1 SV=3	29904	Q6PDM2	NP_001071635	110809	21300	19230	24520	23670	27320	21630	25740	15920			19834	20765	19470	18353	21668	20920	20995	15824			0.072	-0.076	0.275	0.224	0.431	0.094	0.345	-0.348			-0.031	0.035	-0.058	-0.143	0.097	0.046	0.051	-0.357
Srxn1	24.3%	SRXN1_MOUSE	2	4	Sulfiredoxin-1 OS=Mus musculus GN=Srxn1 PE=2 SV=1	15171	Q9D975	NP_083964	76650	119791	97067	171290	149080	88670	100102	125815	71316			111548	104818	136012	115596	70323	96812	102618	70888			0.306	-0.434	1.046	0.975	0.118	0.248	0.656	-0.482			0.203	-0.323	0.713	0.608	-0.217	0.2	0.362	-0.491
Ssbp1	19.7%	SSBP_MOUSE	2	4	Single-stranded DNA-binding protein, mitochondrial OS=Mus musculus GN=Ssbp1 PE=1 SV=1	19428	Q9CYR0	NP_082634	381760	66030	45554	67706	66554	84610	38942	53714	21779			61486	49192	53761	51606	67103	37663	43810	21648			0.196	-0.229	0.451	0.325	0.874	-0.444	0.009	-0.834			0.094	-0.118	0.118	-0.042	0.54	-0.492	-0.285	-0.843
Ssr1	5.2%	SSRA_MOUSE	1	1	Translocon-associated protein subunit alpha OS=Mus musculus GN=Ssr1 PE=1 SV=1	34795	Q9CY50	NP_080241	107513	9491	7556	12440	10620	13770	8192	9769	9683			8839	8159	9877	8234	10920	7923	7969	9625			0.155	-0.174	0.545	0.317	0.692	-0.057	0.197	0.184			0.052	-0.063	0.213	-0.05	0.358	-0.105	-0.097	0.175
Stab1	0.6%	STAB1_MOUSE	1	1	Stabilin-1 OS=Mus musculus GN=Stab1 PE=1 SV=1	304893	Q8R4Y4			20940	19150	14450	18740	16840	50110	27870	18300			19499	20680	11474	14531	13355	48464	22731	18190			0.063	-0.066	-0.472	-0.097	-0.251	1.322	0.475	-0.131			-0.04	0.045	-0.805	-0.464	-0.586	1.274	0.181	-0.14
Stat1	20.4%	STAT1_MOUSE	12	27	Signal transducer and activator of transcription 1 OS=Mus musculus GN=Stat1 PE=1 SV=1	100201	P42225			91845	86072	92088	145375	107018	65525	125972	66088			85525	92946	73121	112723	84874	63372	102746	65690			0.066	-0.073	0.154	0.726	0.012	-0.508	0.474	-0.439			-0.037	0.038	-0.178	0.36	-0.322	-0.556	0.18	-0.448
Stk4	3.3%	STK4_MOUSE	1	2	Serine/threonine-protein kinase 4 OS=Mus musculus GN=Stk4 PE=1 SV=1	64442	Q9JI11	NP_067395	58231	26415	22640	31110	37290	23770	32335	38590	30825			24598	24448	24703	28914	18851	31273	31475	30639			0.052	-0.073	0.373	0.595	-0.065	0.384	0.693	0.326			-0.051	0.038	0.041	0.228	-0.399	0.336	0.399	0.317
Stom	4.2%	STOM_MOUSE	1	1	Erythrocyte band 7 integral membrane protein OS=Mus musculus GN=Stom PE=1 SV=3	34964	P54116	NP_038543	13830	49720	38710	54540	68270	33460	69000	82270	29760			46298	41802	43307	52936	26537	66733	67102	29581			0.169	-0.192	0.303	0.627	-0.402	0.642	0.896	-0.571			0.066	-0.081	-0.03	0.26	-0.737	0.594	0.602	-0.58
Stt3a	1%	STT3A_MOUSE	1	1	Dolichyl-diphosphooligosaccharide--protein glycosyltransferase subunit STT3A OS=Mus musculus GN=Stt3a PE=1 SV=1	87532	P46978	NP_032434	16430	53250	47880	58500	67480	51330	59180	69320	51030			49586	51704	46452	52323	40709	57237	56540	50724			0.075	-0.079	0.21	0.416	0.022	0.227	0.455	0.013			-0.028	0.032	-0.122	0.049	-0.313	0.179	0.161	0.005
Surf4	6.7%	SURF4_MOUSE	1	1	Surfeit locus protein 4 OS=Mus musculus GN=Surf4 PE=1 SV=1	33339	Q64310	NP_035642	20932	15100	9240	28450	21310	27180	17270	29340	8461			14061	9978	22591	16524	21557	16702	23930	8411			0.311	-0.397	1.225	0.808	1.159	0.505	1.27	-0.524			0.208	-0.287	0.892	0.441	0.825	0.457	0.976	-0.533
Tagln2	31.2%	TAGL2_MOUSE	5	16	Transgelin-2 OS=Mus musculus GN=Tagln2 PE=1 SV=4	25760	Q9WVA4	NP_848713	21346	106260	86790	100835	134950	65920	139650	158500	108850			98948	93721	80067	104639	52280	135062	129277	108197			0.092	-0.105	0.117	0.342	-0.364	0.347	0.581	0.078			-0.01	0.006	-0.216	-0.025	-0.698	0.299	0.287	0.069
Tango2	15.9%	TNG2_MOUSE	2	4	Transport and Golgi organization 2 homolog OS=Mus musculus GN=Tango2 PE=1 SV=1	34650	P54797			67464	64682	85166	101882	62262	59527	76908	55398			62822	69847	67626	78999	49379	57571	62728	55066			0.032	-0.062	0.658	0.744	0.458	0.828	0.997	0.926			-0.072	0.05	0.325	0.377	0.123	0.78	0.703	0.917
Tank	4.9%	TANK_MOUSE	1	3	TRAF family member-associated NF-kappa-B activator OS=Mus musculus GN=Tank PE=1 SV=1	58123	P70347	NP_001157544	21353	60860	42730	144200	145800	101500	31790	63820	28190			56672	46143	114502	113052	80499	30746	52053	28020			0.233	-0.278	1.421	1.437	1.004	-0.681	0.346	-0.878			0.13	-0.167	1.088	1.07	0.67	-0.729	0.052	-0.886
Tapbp	16.6%	TPSN_MOUSE	3	4	Tapasin OS=Mus musculus GN=Tapbp PE=1 SV=2	54803	Q9R233	NP_033344	21356	23640	24960	24980	23110	26050	16800	26540	16100			22014	26953	19835	17919	20660	16248	21646	16003			0.108	-0.118	0.978	0.783	0.917	0.335	0.575	0.16			0.005	-0.007	0.645	0.416	0.582	0.286	0.281	0.151
Tbc1d13	11.8%	TBC13_MOUSE	3	5	TBC1 domain family member 13 OS=Mus musculus GN=Tbc1d13 PE=1 SV=1	52550	Q8R3D1	NP_666364	70296	61660	54065	70230	78020	57705	78300	76585	71080			57417	58383	55765	60496	45766	75728	62465	70653			0.091	-0.097	0.281	0.432	-0.01	0.438	0.406	0.298			-0.012	0.013	-0.052	0.065	-0.345	0.389	0.112	0.289
Tcp1	23.4%	TCPA_MOUSE	10	14	T-complex protein 1 subunit alpha OS=Mus musculus GN=Tcp1 PE=1 SV=3	70263	P11983	NP_001277641	21454	63015	51065	61460	70570	82045	65075	73930	61885			58679	55143	48802	54720	65069	62938	60299	61514			0.068	-0.072	0.13	0.315	0.456	0.094	0.222	-0.02			-0.036	0.039	-0.202	-0.052	0.121	0.045	-0.072	-0.029
Tecr	2.9%	TECR_MOUSE	1	1	Very-long-chain enoyl-CoA reductase OS=Mus musculus GN=Tecr PE=1 SV=1	41278	Q9CY27	NP_081455	106529	32980	26140	29420	37040	24790	38270	29940	22410			30710	28228	23361	28720	19661	37012	24420	22275			0.158	-0.177	-0.007	0.325	-0.254	0.373	0.018	-0.4			0.055	-0.067	-0.34	-0.042	-0.588	0.324	-0.276	-0.408
Tgfb3	1.7%	TGFB3_MOUSE	1	1	Transforming growth factor beta-3 OS=Mus musculus GN=Tgfb3 PE=2 SV=1	53382	P17125			114300	116700	207100	182600	240700	51970	46520	22500			106435	126020	164446	141587	190896	50263	37943	22365			-0.015	0.015	0.842	0.661	1.059	-1.152	-1.312	-2.36			-0.118	0.126	0.51	0.294	0.725	-1.2	-1.606	-2.369
Tgm2	4.1%	TGM2_MOUSE	2	2	Protein-glutamine gamma-glutamyltransferase 2 OS=Mus musculus GN=Tgm2 PE=1 SV=4	85715	P21981	NP_033399	21817	34235	35445	42000	44935	52485	28090	37720	25620			31879	38275	33350	34843	41625	27167	30766	25466			-0.045	0.042	0.251	0.364	0.602	-0.28	-0.041	-0.53			-0.148	0.153	-0.082	-0.003	0.269	-0.328	-0.336	-0.539
Thbs1	0.9%	TSP1_MOUSE	1	1	Thrombospondin-1 OS=Mus musculus GN=Thbs1 PE=1 SV=1	146847	P35441			81800	76060	89470	94210	80890	78350	91430	90650			76170	82134	71044	73049	64152	75777	74573	90106			0.052	-0.053	0.181	0.255	0.035	-0.011	0.212	0.2			-0.051	0.057	-0.152	-0.112	-0.299	-0.059	-0.082	0.191
Tkt	4.7%	TKT_MOUSE	2	2	Transketolase OS=Mus musculus GN=Tkt PE=1 SV=1	78584	P40142	NP_033414	21881	77510	67790	96690	105640	62510	90655	101520	58130			72176	73204	76776	81912	49576	87677	82802	57780			0.112	-0.122	0.576	0.76	0.032	0.314	0.564	-0.186			0.008	-0.01	0.243	0.392	-0.302	0.266	0.27	-0.195
Tln1	11.4%	TLN1_MOUSE	14	23	Talin-1 OS=Mus musculus GN=Tln1 PE=1 SV=2	309403	P26039	NP_035732	21894	22225	18050	21440	24995	19850	25630	22785	21070			20696	19492	17024	19381	15742	24788	18584	20944			0.179	-0.213	0.356	0.473	0.298	0.339	0.244	0.078			0.076	-0.102	0.023	0.106	-0.035	0.291	-0.05	0.069
Tmod3	43.2%	TMOD3_MOUSE	12	29	Tropomodulin-3 OS=Mus musculus GN=Tmod3 PE=1 SV=1	46238	Q9JHJ0	NP_058659	50875	146375	130150	99220	79720	544500	62400	77820	42778			136302	140545	78785	61815	431835	60349	63472	42521			0.089	-0.096	-0.387	-0.826	2.006	-1.226	-0.876	-1.65			-0.013	0.016	-0.72	-1.194	1.672	-1.275	-1.17	-1.658
Tnfsf11	8.9%	TNF11_MOUSE	1	2	Tumor necrosis factor ligand superfamily member 11 OS=Mus musculus GN=Tnfsf11 PE=1 SV=2	38417	O35235	NP_035743	21943	30015	23245	28160	41185	78405	25940	49635	40405			27950	25101	22360	31935	62182	25088	40484	40162			0.174	-0.198	0.037	0.599	1.566	-0.034	0.9	0.592			0.071	-0.087	-0.296	0.232	1.232	-0.082	0.606	0.583
Tnip1	1.2%	TNIP1_MOUSE	1	1	TNFAIP3-interacting protein 1 OS=Mus musculus GN=Tnip1 PE=1 SV=1	86008	Q9WUU8	NP_001186205	57783	26770	20110	30590	28140	38980	20920	46980	59620			24928	21716	24290	21819	30914	20233	38319	59262			0.192	-0.221	0.384	0.264	0.734	-0.164	1.003	1.347			0.089	-0.11	0.051	-0.103	0.399	-0.212	0.709	1.338
Tns3	1.3%	TENS3_MOUSE	1	1	Tensin-3 OS=Mus musculus GN=Tns3 PE=1 SV=1	173301	Q5SSZ5	NP_001077056	319939	77430	63310	81180	101300	65850	70990	77170	62620			72101	68366	64460	78548	52225	68659	62942	62243			0.138	-0.153	0.206	0.526	-0.096	0.013	0.133	-0.168			0.035	-0.042	-0.127	0.159	-0.43	-0.036	-0.161	-0.177
Tp53bp2	0.7%	ASPP2_MOUSE	1	1	Apoptosis-stimulating of p53 protein 2 OS=Mus musculus GN=Tp53bp2 PE=1 SV=3	141834	Q8CG79	NP_775554	209456	76280	79840	78130	64630	133100	66990	81470	53330			71030	86217	62039	50114	105559	64790	66449	53010			-0.033	0.033	0.001	-0.272	0.77	-0.221	0.062	-0.55			-0.136	0.143	-0.331	-0.639	0.435	-0.269	-0.232	-0.558
Tpi1	62.5%	TPIS_MOUSE	11	27	Triosephosphate isomerase OS=Mus musculus GN=Tpi1 PE=1 SV=4	37955	P17751	NP_033441	21991	119555	95460	119220	117700	105900	89880	125000	90605			111328	103084	94665	91264	83987	86927	101954	90061			0.118	-0.129	0.17	0.209	0.134	-0.019	0.267	-0.013			0.016	-0.018	-0.163	-0.158	-0.201	-0.068	-0.027	-0.022
Tpm3	24.2%	TPM3_MOUSE	8	13	Tropomyosin alpha-3 chain OS=Mus musculus GN=Tpm3 PE=1 SV=3	41968	P21107	NP_001240667	59069	112695	105755	180675	137150	178975	104145	103890	99950			104940	114201	143464	106346	141944	100724	84736	99350			0.064	-0.068	0.508	0.196	0.769	-0.112	-0.076	-0.289			-0.039	0.044	0.174	-0.172	0.434	-0.16	-0.37	-0.297
Tpm4	26.6%	TPM4_MOUSE	5	6	Tropomyosin alpha-4 chain OS=Mus musculus GN=Tpm4 PE=1 SV=3	34523	Q6IRU2	NP_001001491	326618	49610	43810	62800	53920	103400	35230	40310	26530			46196	47309	49865	41809	82005	34073	32877	26370			0.038	-0.057	0.426	0.221	1.038	-0.484	-0.118	-0.686			-0.065	0.054	0.093	-0.146	0.703	-0.532	-0.412	-0.695
Trim21	40.2%	RO52_MOUSE	19	51	E3 ubiquitin-protein ligase TRIM21 OS=Mus musculus GN=Trim21 PE=1 SV=1	62500	Q62191			87600	72210	128000	163200	90760	154800	102900	51910			81572	77977	101637	126545	71980	149715	83928	51599			0.094	-0.101	0.497	0.859	-0.21	0.191	0.285	-1.105			-0.009	0.01	0.164	0.492	-0.544	0.143	-0.009	-1.114
Tuba1c	2.9%	TBA1C_MOUSE	1	3	Tubulin alpha-1C chain OS=Mus musculus GN=Tuba1c PE=1 SV=1	55145	P68373	NP_033474	22146	100700	99820	94230	138100	79580	81020	113100	103400			93771	107792	74822	107083	63114	78359	92247	102779			0.128	-0.155	0.056	0.318	-0.185	-0.162	0.402	0.083			0.025	-0.044	-0.277	-0.049	-0.52	-0.211	0.108	0.074
Tuba4a	7.8%	TBA4A_MOUSE	2	4	Tubulin alpha-4A chain OS=Mus musculus GN=Tuba4a PE=1 SV=1	55217	P68368	NP_033473	22145	36490	32086	43978	50818	36212	29518	44230	34388			33980	34649	34920	39404	28719	28547	36074	34182			0.128	-0.144	0.45	0.63	0.249	-0.213	0.372	0.08			0.026	-0.034	0.118	0.263	-0.085	-0.261	0.079	0.071
Tubb2a	12.1%	TBB2A_MOUSE	3	5	Tubulin beta-2A chain OS=Mus musculus GN=Tubb2a PE=1 SV=1	53941	Q7TMM9	NP_033476	22151	82210	66330	97640	115600	91090	75390	87100	82880			76554	71627	77531	89635	72242	72914	71041	82383			0.118	-0.128	0.253	0.411	-0.173	0.195	0.456	-0.385			0.015	-0.017	-0.08	0.044	-0.508	0.147	0.162	-0.393
Tubb4b	16%	TBB4B_MOUSE	4	11	Tubulin beta-4B chain OS=Mus musculus GN=Tubb4b PE=1 SV=1	53922	P68372	NP_666228	227613	94780	86892	100205	114400	94248	84448	109185	89638			88258	93832	79568	88706	74746	81674	89055	89100			0.085	-0.09	0.218	0.481	0.186	0.027	0.249	0.074			-0.018	0.02	-0.115	0.114	-0.149	-0.021	-0.045	0.065
Tubb5	16%	TBB5_MOUSE	4	10	Tubulin beta-5 chain OS=Mus musculus GN=Tubb5 PE=1 SV=1	53762	P99024	NP_035785	22154	94208	83388	110885	121050	103880	100578	106762	97830			87726	90048	88048	93861	82386	97273	87078	97242			0.074	-0.086	0.292	0.462	0.03	0.122	0.322	0.14			-0.029	0.025	-0.041	0.094	-0.304	0.074	0.028	0.131
Tubb6	5.8%	TBB6_MOUSE	2	4	Tubulin beta-6 chain OS=Mus musculus GN=Tubb6 PE=1 SV=1	54410	Q922F4	NP_080749	67951	50500	40300	49565	59810	69915	36780	50380	53400			47025	43519	39356	46376	55449	35572	41091	53079			0.191	-0.22	0.209	0.532	0.585	-0.15	0.28	0.212			0.088	-0.11	-0.124	0.165	0.251	-0.198	-0.014	0.203
Tufm	9.1%	EFTU_MOUSE	2	5	Elongation factor Tu, mitochondrial OS=Mus musculus GN=Tufm PE=1 SV=1	57209	Q8BFR5	NP_001157185	233870	29738	21401	32638	36870	33820	30548	34142	31168			27691	23110	25916	28590	26822	29543	27848	30981			0.154	-0.177	0.156	0.406	0.327	0.16	0.556	0.336			0.051	-0.067	-0.176	0.039	-0.007	0.112	0.262	0.327
Twf1	16.3%	TWF1_MOUSE	3	3	Twinfilin-1 OS=Mus musculus GN=Twf1 PE=1 SV=2	46699	Q91YR1	NP_032997	19230	31850	31120	36220	37930	60200	25790	30730	20250			29658	33605	28760	29411	47743	24944	25064	20129			0.017	-0.017	0.202	0.269	0.935	-0.263	-0.032	-0.637			-0.086	0.094	-0.131	-0.098	0.601	-0.311	-0.326	-0.645
Twf2	4.9%	TWF2_MOUSE	1	1	Twinfilin-2 OS=Mus musculus GN=Twf2 PE=1 SV=1	45862	Q9Z0P5	NP_036006	23999	5048	4627	8359	8300	18580	6205	8307	5783			4700	4997	6637	6435	14736	6001	6776	5748			0.061	-0.064	0.789	0.779	1.941	0.359	0.78	0.258			-0.041	0.047	0.456	0.412	1.607	0.311	0.486	0.249
Txlna	2.9%	TXLNA_MOUSE	1	1	Alpha-taxilin OS=Mus musculus GN=Txlna PE=1 SV=1	75849	Q6PAM1	NP_001005506	109658	154000	150400	155000	173700	174300	145100	148500	178100			143403	162411	123077	134686	138235	140334	121120	177031			0.017	-0.017	0.026	0.191	0.196	-0.069	-0.036	0.227			-0.086	0.094	-0.306	-0.176	-0.139	-0.117	-0.33	0.218
Txn	42.9%	THIO_MOUSE	5	10	Thioredoxin OS=Mus musculus GN=Txn PE=1 SV=3	14989	P10639	NP_035790	22166	219175	187180	217950	215180	232135	152405	204000	240850			204092	202128	173061	166850	184103	147399	166388	239404			0.093	-0.107	0.014	0.186	0.348	-0.26	0.081	0.323			-0.01	0.004	-0.318	-0.181	0.014	-0.308	-0.213	0.314
Txnrd1	20.1%	TRXR1_MOUSE	6	8	Thioredoxin reductase 1, cytoplasmic OS=Mus musculus GN=Txnrd1 PE=1 SV=3	77406	Q9JMH6	NP_001035978	50493	47525	34160	55930	53065	53830	41270	52100	37955			44254	36889	44411	41146	42692	39914	42494	37727			0.169	-0.193	0.532	0.571	0.431	0.054	0.409	-0.011			0.067	-0.082	0.2	0.204	0.097	0.006	0.115	-0.019
Uap1l1	15.4%	UAP1L_MOUSE	5	7	UDP-N-acetylhexosamine pyrophosphorylase-like protein 1 OS=Mus musculus GN=Uap1l1 PE=1 SV=1	61673	Q3TW96	NP_001028465	227620	35540	44190	35630	40700	41460	41600	51720	36840			33094	47719	28291	31558	32881	40233	42185	36619			0.155	-0.174	0.455	0.54	0.057	0.599	0.634	0.599			0.052	-0.063	0.123	0.173	-0.278	0.55	0.34	0.59
Uba1	18.5%	UBA1_MOUSE	11	18	Ubiquitin-like modifier-activating enzyme 1 OS=Mus musculus GN=Uba1 PE=1 SV=1	131535	Q02053	NP_001129557	22201	27170	22910	35400	36940	26600	30210	34080	21710			25300	24740	28109	28644	21096	29218	27797	21580			0.151	-0.169	0.288	0.765	0.158	0.307	0.624	-0.069			0.048	-0.058	-0.045	0.398	-0.176	0.258	0.33	-0.078
Ube2d2	28.6%	UB2D2_MOUSE	2	3	Ubiquitin-conjugating enzyme E2 D2 OS=Mus musculus GN=Ube2d2 PE=1 SV=1	19015	P62838	NP_064296	56550	20042	16885	31355	31158	27738	23880	31028	21265			18663	18233	24898	24159	21998	23097	25307	21137			0.095	-0.107	0.874	0.814	0.706	0.466	0.825	0.322			-0.008	0.004	0.542	0.446	0.371	0.417	0.531	0.313
Ube2l3	63.6%	UB2L3_MOUSE	6	11	Ubiquitin-conjugating enzyme E2 L3 OS=Mus musculus GN=Ube2l3 PE=1 SV=1	22375	P68037	NP_033482	22195	54770	48720	57880	88870	42285	69215	92455	53435			51001	52611	45959	68909	33536	66942	75409	53115			0.113	-0.124	0.184	0.546	-0.109	0.368	0.775	0.057			0.01	-0.013	-0.148	0.178	-0.443	0.32	0.481	0.048
Ube4a	2.4%	UBE4A_MOUSE	1	1	Ubiquitin conjugation factor E4 A OS=Mus musculus GN=Ube4a PE=1 SV=1	130664	E9Q735	NP_663375	140630	9168	2940	9922	12940	16030	9578	12810	12760			8538	3175	7878	10033	12714	9264	10448	12683			0.599	-1.042	0.713	1.096	1.405	0.662	1.081	1.076			0.496	-0.931	0.38	0.729	1.07	0.614	0.787	1.067
Umps	4.6%	UMPS_MOUSE	1	1	Uridine 5~-monophosphate synthase OS=Mus musculus GN=Umps PE=1 SV=3	59647	P13439	NP_033497	22247	19380	8857	28790	29010	23730	25940	28480	27960			18046	9564	22861	22493	18820	25088	23229	27793			0.457	-0.673	1.028	1.039	0.749	0.878	1.012	0.986			0.354	-0.562	0.695	0.672	0.415	0.829	0.718	0.977
Uqcr10	10.9%	QCR9_MOUSE	1	1	Cytochrome b-c1 complex subunit 9 OS=Mus musculus GN=Uqcr10 PE=1 SV=1	8816	Q8R1I1	NP_932096	66152	21010	20480	9613	18960	18190	19870	22940	49730			19564	22116	7634	14702	14426	19218	18711	49431			0.018	-0.019	-1.11	-0.13	-0.19	-0.062	0.145	1.261			-0.085	0.092	-1.442	-0.497	-0.524	-0.11	-0.149	1.253
Uqcrc1	4.4%	QCR1_MOUSE	1	1	Cytochrome b-c1 complex subunit 1, mitochondrial OS=Mus musculus GN=Uqcrc1 PE=1 SV=2	56654	Q9CZ13	NP_079683	22273	23840	18540	22470	18670	39960	19620	24940	46560			22200	20020	17842	14476	31692	18976	20342	46281			0.17	-0.193	0.085	-0.183	0.915	-0.111	0.235	1.136			0.067	-0.082	-0.248	-0.55	0.581	-0.159	-0.059	1.127
Uqcrh	20.2%	QCR6_MOUSE	1	1	Cytochrome b-c1 complex subunit 6, mitochondrial OS=Mus musculus GN=Uqcrh PE=1 SV=2	12546	P99028	NP_079917	66576	36080	36970	40160	37280	39130	38310	42840	44120			33597	39922	31888	28907	31034	37051	34942	43855			-0.018	0.017	0.137	0.03	0.099	0.069	0.23	0.273			-0.121	0.128	-0.196	-0.337	-0.235	0.021	-0.064	0.264
Usp15	2.1%	UBP15_MOUSE	1	1	Ubiquitin carboxyl-terminal hydrolase 15 OS=Mus musculus GN=Usp15 PE=1 SV=1	129320	Q8R5H1	NP_001288557	14479	23230	17010	35160	34290	31840	27350	36990	21190			21632	18369	27918	26588	25252	26451	30170	21063			0.207	-0.242	0.805	0.769	0.662	0.443	0.879	0.075			0.104	-0.131	0.473	0.402	0.328	0.395	0.584	0.066
Usp4	0.7%	UBP4_MOUSE	1	1	Ubiquitin carboxyl-terminal hydrolase 4 OS=Mus musculus GN=Usp4 PE=1 SV=3	123449	P35123	NP_035808	22258	15720	16600	12710	16160	13330	18350	19170	11900			14638	17926	10092	12531	10572	17747	15635	11829			-0.04	0.039	-0.346	0	-0.278	0.183	0.246	-0.441			-0.143	0.15	-0.679	-0.367	-0.612	0.135	-0.048	-0.45
Usp5	7.2%	UBP5_MOUSE	4	4	Ubiquitin carboxyl-terminal hydrolase 5 OS=Mus musculus GN=Usp5 PE=1 SV=1	108601	P56399	NP_001313523	22225	35590	33220	38675	48970	35950	51035	52550	53390			33140	35874	30710	37971	28512	49358	42861	53069			0.117	-0.128	0.187	0.464	0.072	0.392	0.533	0.396			0.014	-0.017	-0.146	0.096	-0.263	0.344	0.239	0.388
Usp9x	0.4%	USP9X_MOUSE	1	1	Probable ubiquitin carboxyl-terminal hydrolase FAF-X OS=Mus musculus GN=Usp9x PE=1 SV=2	324769	P70398	NP_033507	22284	39060	34010	42000	42040	31170	39210	47490	40730			36372	36726	33350	32597	24721	37922	38734	40485			0.096	-0.103	0.201	0.202	-0.229	0.102	0.378	0.157			-0.006	0.008	-0.132	-0.165	-0.564	0.054	0.084	0.148
Vapa	16.9%	VAPA_MOUSE	3	3	Vesicle-associated membrane protein-associated protein A OS=Mus musculus GN=Vapa PE=1 SV=2	33565	Q9WV55	NP_038961	30960	32130	22530	58170	58060	55870	35720	50370	47380			29919	24329	46190	45020	44310	34547	41084	47095			0.244	-0.294	0.064	-0.163	0.127	-0.036	0.433	-0.033			0.142	-0.184	-0.269	-0.53	-0.207	-0.084	0.139	-0.042
Vapb	13.6%	VAPB_MOUSE	2	2	Vesicle-associated membrane protein-associated protein B OS=Mus musculus GN=Vapb PE=1 SV=3	32199	Q9QY76			54935	50590	51980	56160	59450	54120	60235	47760			51154	54630	41275	43546	47150	52342	49130	47473			0.067	-0.071	-0.034	0.044	0.127	-0.001	0.164	-0.166			-0.036	0.04	-0.367	-0.323	-0.208	-0.049	-0.13	-0.175
Vat1	6.2%	VAT1_MOUSE	2	4	Synaptic vesicle membrane protein VAT-1 homolog OS=Mus musculus GN=Vat1 PE=1 SV=3	47880	Q62465	NP_036167	26949	71875	65010	79492	101232	56125	100598	90550	57692			66928	70202	63121	78496	44512	97293	73854	57347			0.074	-0.082	0.236	0.566	-0.273	0.483	0.42	-0.233			-0.028	0.029	-0.097	0.199	-0.607	0.435	0.126	-0.242
Vav1	2%	VAV_MOUSE	1	2	Proto-oncogene vav OS=Mus musculus GN=Vav1 PE=1 SV=1	112791	P27870	NP_035821	22324	8755	6612	24495	33270	13435	21310	26035	17300			8152	7139	19450	25797	10655	20611	21235	17196			0.188	-0.272	1.662	2.084	0.775	1.462	1.723	1.143			0.085	-0.161	1.33	1.717	0.441	1.414	1.429	1.134
Vcp	3.7%	TERA_MOUSE	2	7	Transitional endoplasmic reticulum ATPase OS=Mus musculus GN=Vcp PE=1 SV=4	100950	Q01853	NP_033529	269523	20840	16865	28658	25898	33915	20895	21675	18042			19405	18212	22755	20081	26898	20209	17679	17935			0.126	-0.139	0.62	0.522	0.81	0.26	0.331	0.026			0.024	-0.028	0.287	0.155	0.475	0.212	0.037	0.017
Vdac2	22%	VDAC2_MOUSE	6	12	Voltage-dependent anion-selective channel protein 2 OS=Mus musculus GN=Vdac2 PE=1 SV=2	37840	Q60930	NP_035825	22334	106778	86720	76422	108172	90088	100840	140800	126625			99430	93645	60683	83876	71447	97528	114841	125865			0.054	-0.056	-0.212	0.166	-0.153	0.176	0.45	0.449			-0.049	0.055	-0.544	-0.201	-0.487	0.128	0.156	0.441
Vdac3	6.7%	VDAC3_MOUSE	2	3	Voltage-dependent anion-selective channel protein 3 OS=Mus musculus GN=Vdac3 PE=1 SV=1	37263	Q60931	NP_035826	22335	31895	29394	32032	35830	49434	31415	41892	31032			29699	31741	25435	27782	39206	30384	34168	30846			0.036	-0.037	0.016	0.456	0.475	0.391	0.635	0.321			-0.067	0.074	-0.316	0.089	0.141	0.343	0.341	0.313
Vim	51.5%	VIME_MOUSE	22	45	Vimentin OS=Mus musculus GN=Vim PE=1 SV=3	58983	P20152	NP_035831	22352	115300	99160	78890	50105	388900	47170	72452	41150			107365	107080	62643	38851	308432	45620	59094	40904			0.072	-0.076	-0.427	-1.085	2.041	-1.04	-0.454	-1.196			-0.031	0.035	-0.76	-1.452	1.706	-1.088	-0.748	-1.205
Vps13c	0.6%	VP13C_MOUSE	1	1	Vacuolar protein sorting-associated protein 13C OS=Mus musculus GN=Vps13c PE=1 SV=2	487703	Q8BX70	NP_796158	320528	5960	7233	9728	7601	7321	5430	7359	7537			5549	7811	7724	5894	5806	5251	6003	7491			-0.146	0.133	0.56	0.204	0.15	-0.281	0.158	0.192			-0.249	0.244	0.228	-0.163	-0.184	-0.329	-0.136	0.184
Vps37b	6.3%	VP37B_MOUSE	1	1	Vacuolar protein sorting-associated protein 37B OS=Mus musculus GN=Vps37b PE=1 SV=1	34531	Q8R0J7	NP_808544	330192	12430	13070	30410	20340	32960	22720	25960	23500			11574	14113	24147	15771	26140	21973	21174	23359			-0.037	0.036	1.254	0.674	1.37	0.833	1.026	0.882			-0.14	0.147	0.921	0.307	1.036	0.785	0.732	0.873
Vwa5a	5.3%	VMA5A_MOUSE	3	6	von Willebrand factor A domain-containing protein 5A OS=Mus musculus GN=Vwa5a PE=1 SV=2	100891	Q99KC8	NP_001139429	67776	29190	23905	28010	35180	26090	34300	34795	33975			27182	25814	22241	27278	20692	33173	28380	33771			-0.008	0.008	0.076	0.302	-0.001	0.344	0.153	0.089			-0.11	0.118	-0.257	-0.065	-0.335	0.296	-0.141	0.08
Wasf2	3.8%	WASF2_MOUSE	1	1	Wiskott-Aldrich syndrome protein family member 2 OS=Mus musculus GN=Wasf2 PE=1 SV=1	60685	Q8BH43	NP_700472	242687	184000	168200	141900	205300	141400	198300	217100	223300			171338	181633	112675	159189	112143	191786	177072	221959			0.063	-0.066	-0.312	0.221	-0.317	0.171	0.302	0.343			-0.04	0.045	-0.644	-0.146	-0.651	0.123	0.008	0.334
Wdr26	11.5%	WDR26_MOUSE	6	14	WD repeat-containing protein 26 OS=Mus musculus GN=Wdr26 PE=1 SV=3	78114	Q8C6G8	NP_663489	226757	73985	67248	92910	89375	83540	78535	73928	44930			68894	72618	73775	69301	66255	75955	60297	44660			0.067	-0.07	0.405	0.348	0.356	0.178	0.205	-0.298			-0.036	0.04	0.072	-0.019	0.021	0.129	-0.089	-0.307
Xpo1	1.7%	XPO1_MOUSE	1	1	Exportin-1 OS=Mus musculus GN=Xpo1 PE=1 SV=1	138820	Q6P5F9	NP_001030303	103573	20690	15440	36150	41710	29840	34470	41940	31390			19266	16673	28704	32342	23666	33338	34207	31202			0.196	-0.227	1.001	1.207	0.724	0.932	1.215	0.797			0.093	-0.116	0.668	0.84	0.39	0.884	0.921	0.788
Ybx1	27.6%	YBOX1_MOUSE	5	6	Nuclease-sensitive element-binding protein 1 OS=Mus musculus GN=Ybx1 PE=1 SV=3	39604	P62960	NP_035862	22608	41690	38460	33280	41470	23710	50855	45050	43510			38821	41532	26426	32155	18805	49184	36744	43249			0.042	-0.045	-0.051	0.209	-0.002	0.345	0.42	0.124			-0.061	0.066	-0.383	-0.158	-0.337	0.297	0.126	0.115
Ypel5	11.6%	YPEL5_MOUSE	1	1	Protein yippee-like 5 OS=Mus musculus GN=Ypel5 PE=1 SV=1	15207	P62700	NP_081442	383295	7990	6702	11200	6852	11300	6737	7477	5652			7440	7237	8893	5313	8962	6516	6099	5618			0.121	-0.132	0.608	-0.1	0.621	-0.125	0.026	-0.378			0.018	-0.022	0.276	-0.467	0.287	-0.173	-0.269	-0.387
Ywhae	4.7%	1433E_MOUSE	1	1	14-3-3 protein epsilon OS=Mus musculus GN=Ywhae PE=1 SV=1	33681	P62259	NP_033562	22627	20050	17950	22940	26110	20910	19260	22540	17330			18670	19383	18216	20246	16583	18627	18385	17225			0.078	-0.082	0.272	0.459	0.138	0.02	0.246	-0.133			-0.025	0.029	-0.061	0.092	-0.196	-0.029	-0.048	-0.141
Ywhaq	5.7%	1433T_MOUSE	1	1	14-3-3 protein theta OS=Mus musculus GN=Ywhaq PE=1 SV=1	32629	P68254	NP_035869	22630	54020	52700	50900	50240	49810	61040	72830	60520			50302	56909	40417	38955	39503	59035	59402	60157			0.018	-0.018	-0.068	-0.087	-0.099	0.194	0.449	0.182			-0.085	0.093	-0.401	-0.454	-0.434	0.146	0.155	0.173
Ywhaz	12.7%	1433Z_MOUSE	2	2	14-3-3 protein zeta/delta OS=Mus musculus GN=Ywhaz PE=1 SV=1	32737	P63101	NP_001240734	22631	20215	15305	33625	33780	34265	19830	28295	23810			18823	16528	26699	26192	27175	19179	23078	23667			0.178	-0.205	0.876	0.895	0.904	0.074	0.613	0.373			0.075	-0.094	0.544	0.528	0.569	0.026	0.32	0.365
Zar1	1.9%	ZAR1_MOUSE	1	1	Zygote arrest protein 1 OS=Mus musculus GN=Zar1 PE=2 SV=1	44710	Q80SU3	NP_777366	317755	158500	135500	170900	155600	174600	160600	168000	131400			147592	146322	135702	120651	138473	155324	137026	130611			0.109	-0.118	0.217	0.082	0.248	0.128	0.193	-0.162			0.006	-0.007	-0.115	-0.285	-0.086	0.079	-0.101	-0.171
Znf445	1%	ZN445_MOUSE	1	1	Zinc finger protein 445 OS=Mus musculus GN=Znf445 PE=2 SV=2	138122	Q8R2V3	NP_775540	235682	109100	79320	109600	82610	104800	88460	111100	69650			101592	85655	87027	64055	83116	85554	90616	69232			0.212	-0.248	0.218	-0.19	0.154	-0.091	0.238	-0.436			0.109	-0.137	-0.114	-0.557	-0.181	-0.139	-0.056	-0.444
[truncated: 14 more columns]

## Sheet: Fig 6A Volcano Plot data
	P value	Log2 FC	Fold Change		P value	Log2 FC
Actc1	2.9e-02	-1.27	-2.41		1.5376	-1.27	Actc1	-1.27	1.5376
Actg1	3.0e-02	-1.54	-2.91		1.52288	-1.54	Actg1	-1.54	1.52288
Actr2	1.7e-01	-0.76	-1.69		0.769551	-0.76	Actr2	-0.76	0.769551
Actr3	1.9e-01	-0.92	-1.9		0.721246	-0.92	Actr3	-0.92	0.721246
Ap2a2	1.7e-01	-0.37	-1.29		0.769551	-0.37	Ap2a2	-0.37	0.769551
Apaf1	4.7e-02	0.48	1.39		1.3279	0.48	Apaf1	0.48	1.3279
Atg13	7.0e-01	0.1	1.07		0.154902	0.1	Atg13	0.1	0.154902
Atg16l1	4.5e-01	0.15	1.11		0.346787	0.15	Atg16l1	0.15	0.346787
Atg7	3.5e-02	0.61	1.53		1.45593	0.61	Atg7	0.61	1.45593
Camk2d	6.7e-01	0.08	1.06		0.173925	0.08	Camk2d	0.08	0.173925
Capn2	6.6e-03	0.57	1.49		2.18046	0.57	Capn2	0.57	2.18046
Capns1	3.6e-01	0.29	1.23		0.443697	0.29	Capns1	0.29	0.443697
Chuk	1.2e-01	-0.3	-1.23		0.920819	-0.3	Chuk	-0.3	0.920819
Cltc	7.5e-03	-0.53	-1.44		2.12494	-0.53	Cltc	-0.53	2.12494
Csnk2a1	4.2e-01	-0.27	-1.21		0.376751	-0.27	Csnk2a1	-0.27	0.376751
Ctsb	1.7e-01	0.49	1.41		0.769551	0.49	Ctsb	0.49	0.769551
Dnm1l	7.2e-02	0.33	1.25		1.14267	0.33	Dnm1l	0.33	1.14267
Eef1a1	8.5e-01	0.03	1.02		0.0705811	0.03	Eef1a1	0.03	0.0705811
Hspa8	1.7e-02	-0.44	-1.36		1.76955	-0.44	Hspa8	-0.44	1.76955
Ikbkb	7.8e-01	0.04	1.03		0.107905	0.04	Ikbkb	0.04	0.107905
Ikbkg	3.7e-03	0.85	1.8		2.4318	0.85	Ikbkg	0.85	2.4318
Insrr	1.6e-01	0.71	1.63		0.79588	0.71	Insrr	0.71	0.79588
Nfkb2	1.9e-01	-0.27	-1.21		0.721246	-0.27	Nfkb2	-0.27	0.721246
Npm1	7.6e-01	-0.05	-1.03		0.119186	-0.05	Npm1	-0.05	0.119186
Opa1	1.0e-02	0.66	1.58		2	0.66	Opa1	0.66	2
Ppp1ca	6.7e-02	-0.35	-1.27		1.17393	-0.35	Ppp1ca	-0.35	1.17393
Ppp2ca	1.4e-01	-0.27	-1.21		0.853872	-0.27	Ppp2ca	-0.27	0.853872
Ppp2r1a	4.9e-01	0.16	1.12		0.309804	0.16	Ppp2r1a	0.16	0.309804
Prkcd	2.9e-01	0.21	1.15		0.537602	0.21	Prkcd	0.21	0.537602
Rab10	7.8e-01	-0.04	-1.03		0.107905	-0.04	Rab10	-0.04	0.107905
Rab1A	4.5e-02	-0.5	-1.41		1.34679	-0.5	Rab1A	-0.5	1.34679
Rab1b	7.8e-01	-0.09	-1.06		0.107905	-0.09	Rab1b	-0.09	0.107905
Rab5c	2.5e-01	0.19	1.14		0.60206	0.19	Rab5c	0.19	0.60206
Ripk1	2.3e-01	0.2	1.15		0.638272	0.2	Ripk1	0.2	0.638272
Ryr2	7.7e-01	-0.04	-1.03		0.113509	-0.04	Ryr2	-0.04	0.113509
Sec23b	7.6e-01	0.04	1.03		0.119186	0.04	Sec23b	0.04	0.119186
Slc3a2	1.3e-02	-0.8	-1.74		1.88606	-0.8	Slc3a2	-0.8	1.88606
Sqstm1	4.3e-03	-1.09	-2.13		2.36653	-1.09	Sqstm1	-1.09	2.36653
Stk4	7.8e-02	0.39	1.31		1.10791	0.39	Stk4	0.39	1.10791
Tnfsf11	9.6e-01	-0.02	-1.01		0.0177288	-0.02	Tnfsf11	-0.02	0.0177288
Tns3	9.7e-01	0.01	1.01		0.0132283	0.01	Tns3	0.01	0.0132283
Ube2d2	8.2e-01	-0.03	-1.02		0.0861861	-0.03	Ube2d2	-0.03	0.0861861
Ube2l3	8.6e-02	0.42	1.34		1.0655	0.42	Ube2l3	0.42	1.0655
Vcp	1.9e-01	-0.22	-1.16		0.721246	-0.22	Vcp	-0.22	0.721246
Vdac2	6.2e-03	0.65	1.57		2.20761	0.65	Vdac2	0.65	2.20761
Vdac3	6.7e-02	0.36	1.28		1.17393	0.36	Vdac3	0.36	1.17393
Vim	3.1e-01	-0.84	-1.8		0.508638	-0.84	Vim	-0.84	0.508638
Vps13c	7.9e-01	-0.05	-1.04		0.102373	-0.05	Vps13c	-0.05	0.102373
Isg15	1.5e-03	-1.92	-3.79		2.82391	-1.92	Isg15	-1.92	2.82391
