# Supplementary material for: Inflammatory osteolysis is regulated by site-specific ISGylation of the scaffold protein NEMO
Source: eLife. 2020 Mar 23;9:e56095. doi: 10.7554/eLife.56095 (PMC7145425; doi:10.7554/eLife.56095)
Supplement: Figure 6—source data 3. [file elife-56095-fig6-data3.xlsx]

## Sheet: Sheet1
TRAP+ count
	WT	ISG15KO
Well 1	145	485
Well 2	265	460
Well 3	245	515
Well 4	270	390
This file contains 1 data tables and 1 info tables:
Unpaired t test of Data 1
	Data Set-A
Table Analyzed	Data 1
Column B	ISG15-KO
vs.	vs.
Column A	WT
Unpaired t test
P value	0.0011
P value summary	**
Significantly different (P < 0.05)?	Yes
One- or two-tailed P value?	Two-tailed
t, df	t=5.843, df=6
How big is the difference?
Mean of column A	231.3
Mean of column B	462.5
Difference between means (B - A) ± SEM	231.3 ± 39.57
95% confidence interval	134.4 to 328.1
R squared (eta squared)	0.8505
F test to compare variances
F, DFn, Dfd	1.205, 3, 3
P value	0.882
P value summary	ns
Significantly different (P < 0.05)?	No
Data analyzed
Sample size, column A	4
Sample size, column B	4
