# Supplementary material for: Inflammatory osteolysis is regulated by site-specific ISGylation of the scaffold protein NEMO
Source: eLife. 2020 Mar 23;9:e56095. doi: 10.7554/eLife.56095 (PMC7145425; doi:10.7554/eLife.56095)
Supplement: Figure 7—source data 1. [file elife-56095-fig7-data1.xlsx]

## Sheet: Fig 7B
Raw Data
TRAP positive cells
NMWT-GFP	NMWT-ISG15	NMK270A-GFP	NMK270A-ISG15
205	5	535	495
145	75	495	425
345	125	415	375
185	35	375	315
235	45	475	325
255	55	355	305
This file contains 1 data tables and 1 info tables:
Ordinary one-way ANOVA of TRAP count ISG15 overexpression:ANOVA results
	Data Set-A	Data Set-B	Data Set-C	Data Set-D	Data Set-E
Table Analyzed	TRAP count ISG15 overexpression
Data sets analyzed	A-D
ANOVA summary
F	40.97
P value	<0.0001
P value summary	****
Significant diff. among means (P < 0.05)?	Yes
R squared	0.86
Brown-Forsythe test
F (DFn, DFd)	0.9281 (3, 20)
P value	0.4454
P value summary	ns
Are SDs significantly different (P < 0.05)?	No
Bartlett's test
Bartlett's statistic (corrected)	1.824
P value	0.6098
P value summary	ns
Are SDs significantly different (P < 0.05)?	No
ANOVA table	SS	DF	MS	F (DFn, DFd)	P value
Treatment (between columns)	523767	3	174589	F (3, 20) = 40.97	P<0.0001
Residual (within columns)	85233	20	4262
Total	609000	23
Data summary
Number of treatments (columns)	4
Number of values (total)	24
This file can be opened by GraphPad Prism (version 5.00 or later).
This file contains 1 data tables and 1 info tables:
Ordinary one-way ANOVA of TRAP count ISG15 overexpression:Multiple comparisons
Ordinary one-way ANOVA of TRAP count ISG15 overexpression:Multiple comparisons
	Data Set-A	Data Set-B	Data Set-C	Data Set-D	Data Set-E	Data Set-F	Data Set-G	Data Set-H
Number of families	1
Number of comparisons per family	6
Alpha	0.05
Tukey's multiple comparisons test	Mean Diff.	95.00% CI of diff.	Significant?	Summary	Adjusted P Value
NMWT-GFP vs. NMWT-ISG15	171.7	66.17 to 277.2	Yes	**	0.001	A-B
NMWT-GFP vs. NMK270A-GFP	-213.3	-318.8 to -107.8	Yes	****	<0.0001	A-C
NMWT-GFP vs. NMK270A-ISG15	-145	-250.5 to -39.51	Yes	**	0.0051	A-D
NMWT-ISG15 vs. NMK270A-GFP	-385	-490.5 to -279.5	Yes	****	<0.0001	B-C
NMWT-ISG15 vs. NMK270A-ISG15	-316.7	-422.2 to -211.2	Yes	****	<0.0001	B-D
NMK270A-GFP vs. NMK270A-ISG15	68.33	-37.16 to 173.8	No	ns	0.2966	C-D
Test details	Mean 1	Mean 2	Mean Diff.	SE of diff.	n1	n2	q	DF
NMWT-GFP vs. NMWT-ISG15	228.3	56.67	171.7	37.69	6	6	6.441	20
NMWT-GFP vs. NMK270A-GFP	228.3	441.7	-213.3	37.69	6	6	8.005	20
NMWT-GFP vs. NMK270A-ISG15	228.3	373.3	-145	37.69	6	6	5.441	20
NMWT-ISG15 vs. NMK270A-GFP	56.67	441.7	-385	37.69	6	6	14.45	20
NMWT-ISG15 vs. NMK270A-ISG15	56.67	373.3	-316.7	37.69	6	6	11.88	20
NMK270A-GFP vs. NMK270A-ISG15	441.7	373.3	68.33	37.69	6	6	2.564	20
