# Supplementary material for: Inflammatory osteolysis is regulated by site-specific ISGylation of the scaffold protein NEMO
Source: eLife. 2020 Mar 23;9:e56095. doi: 10.7554/eLife.56095 (PMC7145425; doi:10.7554/eLife.56095)
Supplement: Figure 7—source data 2. [file elife-56095-fig7-data2.xlsx]

## Sheet: Sheet1
Change in LC3-GFP
	NM-WT	NM-KA
	-21.6885	-11.1744
	-13.2261	-5.74352
	-21.555	-8.78553
Avg	-18.8232	-8.56782
Stdev	4.84769	2.72198
Unpaired t test of WT vs KA with ISG15
	Data Set-A
Table Analyzed	WT vs KA with ISG15
Column B	NM-KA
vs.	vs.
Column A	NM-WT
Unpaired t test
P value	0.0331
P value summary	*
Significantly different (P < 0.05)?	Yes
One- or two-tailed P value?	Two-tailed
t, df	t=3.195, df=4
How big is the difference?
Mean of column A	-18.82
Mean of column B	-8.568
Difference between means (B - A) ± SEM	10.26 ± 3.210
95% confidence interval	1.343 to 19.17
R squared (eta squared)	0.7185
F test to compare variances
F, DFn, Dfd	3.172, 2, 2
P value	0.4794
P value summary	ns
Significantly different (P < 0.05)?	No
Data analyzed
Sample size, column A	3
Sample size, column B	3
