# Supplementary material for: Inflammatory osteolysis is regulated by site-specific ISGylation of the scaffold protein NEMO
Source: eLife. 2020 Mar 23;9:e56095. doi: 10.7554/eLife.56095 (PMC7145425; doi:10.7554/eLife.56095)
Supplement: Figure 7—source data 3. [file elife-56095-fig7-data3.xlsx]

## Sheet: Fig 7B
Raw Data
TRAP positive cells
NMWT-GFP	NMWT-ISG15	NMK270A-GFP	NMK270A-ISG15
205	5	535	495
145	75	495	425
345	125	415	375
185	35	375	315
235	45	475	325
255	55	355	305
This file contains 1 data tables and 1 info tables:
Ordinary one-way ANOVA of TRAP count ISG15 overexpression:ANOVA results
	Data Set-A	Data Set-B	Data Set-C	Data Set-D	Data Set-E
Table Analyzed	TRAP count ISG15 overexpression
Data sets analyzed	A-D
ANOVA summary
F	40.97
P value	<0.0001
P value summary	****
Significant diff. among means (P < 0.05)?	Yes
R squared	0.86
Brown-Forsythe test
F (DFn, DFd)	0.9281 (3, 20)
P value	0.4454
P value summary	ns
Are SDs significantly different (P < 0.05)?	No
Bartlett's test
Bartlett's statistic (corrected)	1.824
P value	0.6098
P value summary	ns
Are SDs significantly different (P < 0.05)?	No
ANOVA table	SS	DF	MS	F (DFn, DFd)	P value
Treatment (between columns)	523767	3	174589	F (3, 20) = 40.97	P<0.0001
Residual (within columns)	85233	20	4262
Total	609000	23
Data summary
Number of treatments (columns)	4
Number of values (total)	24
This file can be opened by GraphPad Prism (version 5.00 or later).
This file contains 1 data tables and 1 info tables:
Ordinary one-way ANOVA of TRAP count ISG15 overexpression:Multiple comparisons
Ordinary one-way ANOVA of TRAP count ISG15 overexpression:Multiple comparisons
	Data Set-A	Data Set-B	Data Set-C	Data Set-D	Data Set-E	Data Set-F	Data Set-G	Data Set-H
Number of families	1
Number of comparisons per family	6
Alpha	0.05
Tukey's multiple comparisons test	Mean Diff.	95.00% CI of diff.	Significant?	Summary	Adjusted P Value
NMWT-GFP vs. NMWT-ISG15	171.7	66.17 to 277.2	Yes	**	0.001	A-B
NMWT-GFP vs. NMK270A-GFP	-213.3	-318.8 to -107.8	Yes	****	<0.0001	A-C
NMWT-GFP vs. NMK270A-ISG15	-145	-250.5 to -39.51	Yes	**	0.0051	A-D
NMWT-ISG15 vs. NMK270A-GFP	-385	-490.5 to -279.5	Yes	****	<0.0001	B-C
NMWT-ISG15 vs. NMK270A-ISG15	-316.7	-422.2 to -211.2	Yes	****	<0.0001	B-D
NMK270A-GFP vs. NMK270A-ISG15	68.33	-37.16 to 173.8	No	ns	0.2966	C-D
Test details	Mean 1	Mean 2	Mean Diff.	SE of diff.	n1	n2	q	DF
NMWT-GFP vs. NMWT-ISG15	228.3	56.67	171.7	37.69	6	6	6.441	20
NMWT-GFP vs. NMK270A-GFP	228.3	441.7	-213.3	37.69	6	6	8.005	20
NMWT-GFP vs. NMK270A-ISG15	228.3	373.3	-145	37.69	6	6	5.441	20
NMWT-ISG15 vs. NMK270A-GFP	56.67	441.7	-385	37.69	6	6	14.45	20
NMWT-ISG15 vs. NMK270A-ISG15	56.67	373.3	-316.7	37.69	6	6	11.88	20
NMK270A-GFP vs. NMK270A-ISG15	441.7	373.3	68.33	37.69	6	6	2.564	20

## Sheet: Fig 7D
Change in LC3-GFP
	NM-WT	NM-KA
	-21.6885	-11.1744
	-13.2261	-5.74352
	-21.555	-8.78553
Avg	-18.8232	-8.56782
Stdev	4.84769	2.72198
Unpaired t test of WT vs KA with ISG15
	Data Set-A
Table Analyzed	WT vs KA with ISG15
Column B	NM-KA
vs.	vs.
Column A	NM-WT
Unpaired t test
P value	0.0331
P value summary	*
Significantly different (P < 0.05)?	Yes
One- or two-tailed P value?	Two-tailed
t, df	t=3.195, df=4
How big is the difference?
Mean of column A	-18.82
Mean of column B	-8.568
Difference between means (B - A) ± SEM	10.26 ± 3.210
95% confidence interval	1.343 to 19.17
R squared (eta squared)	0.7185
F test to compare variances
F, DFn, Dfd	3.172, 2, 2
P value	0.4794
P value summary	ns
Significantly different (P < 0.05)?	No
Data analyzed
Sample size, column A	3
Sample size, column B	3

## Sheet: Fig 7F
Raw data
TRAP positive cells
GFP	NM-WT	NM-KA	ISG-15	NM-WT+ISG15	NM-KA+ISG15	NM-WT-ISG15	NM-KA-ISG15
131	85	201	45	40	162	35	63
148	134	198	50	51	180	33	78
101	143	212	48	38	144	31	91
This file contains 1 data tables and 1 info tables:
Ordinary one-way ANOVA of Fig 6+NM-ISG15 fusion TRAP OC calcualtion:ANOVA results
	Data Set-A	Data Set-B	Data Set-C	Data Set-D	Data Set-E
Table Analyzed	Fig 6+NM-ISG15 fusion TRAP OC calcualtion
Data sets analyzed	A-H
ANOVA summary
F	42.09
P value	<0.0001
P value summary	****
Significant diff. among means (P < 0.05)?	Yes
R squared	0.9485
Brown-Forsythe test
F (DFn, DFd)	0.9284 (7, 16)
P value	0.5112
P value summary	ns
Are SDs significantly different (P < 0.05)?	No
Bartlett's test
Bartlett's statistic (corrected)
P value
P value summary
Are SDs significantly different (P < 0.05)?
ANOVA table	SS	DF	MS	F (DFn, DFd)	P value
Treatment (between columns)	80085	7	11441	F (7, 16) = 42.09	P<0.0001
Residual (within columns)	4349	16	271.8
Total	84435	23
Data summary
Number of treatments (columns)	8
Number of values (total)	24
This file contains 1 data tables and 1 info tables:
Ordinary one-way ANOVA of Fig 6+NM-ISG15 fusion TRAP OC calcualtion:Multiple comparisons
	Data Set-A	Data Set-B	Data Set-C	Data Set-D	Data Set-E	Data Set-F	Data Set-G	Data Set-H
Number of families	1
Number of comparisons per family	28
Alpha	0.05
Tukey's multiple comparisons test	Mean Diff.	95.00% CI of diff.	Significant?	Summary	Adjusted P Value
GFP vs. NM-WT	6	-40.61 to 52.61	No	ns	0.9998	A-B
GFP vs. NM-KA	-77	-123.6 to -30.39	Yes	***	0.0007	A-C
GFP vs. ISG-15	79	32.39 to 125.6	Yes	***	0.0005	A-D
GFP vs. NM-WT+ISG15	83.67	37.06 to 130.3	Yes	***	0.0003	A-E
GFP vs. NM-KA+ISG15	-35.33	-81.94 to 11.27	No	ns	0.2164	A-F
GFP vs. NM-WT-ISG15	93.67	47.06 to 140.3	Yes	****	<0.0001	A-G
GFP vs. NM-KA-ISG15	49.33	2.726 to 95.94	Yes	*	0.0341	A-H
NM-WT vs. NM-KA	-83	-129.6 to -36.39	Yes	***	0.0003	B-C
NM-WT vs. ISG-15	73	26.39 to 119.6	Yes	**	0.0011	B-D
NM-WT vs. NM-WT+ISG15	77.67	31.06 to 124.3	Yes	***	0.0006	B-E
NM-WT vs. NM-KA+ISG15	-41.33	-87.94 to 5.274	No	ns	0.1022	B-F
NM-WT vs. NM-WT-ISG15	87.67	41.06 to 134.3	Yes	***	0.0002	B-G
NM-WT vs. NM-KA-ISG15	43.33	-3.274 to 89.94	No	ns	0.0783	B-H
NM-KA vs. ISG-15	156	109.4 to 202.6	Yes	****	<0.0001	C-D
NM-KA vs. NM-WT+ISG15	160.7	114.1 to 207.3	Yes	****	<0.0001	C-E
NM-KA vs. NM-KA+ISG15	41.67	-4.940 to 88.27	No	ns	0.0978	C-F
NM-KA vs. NM-WT-ISG15	170.7	124.1 to 217.3	Yes	****	<0.0001	C-G
NM-KA vs. NM-KA-ISG15	126.3	79.73 to 172.9	Yes	****	<0.0001	C-H
ISG-15 vs. NM-WT+ISG15	4.667	-41.94 to 51.27	No	ns	>0.9999	D-E
ISG-15 vs. NM-KA+ISG15	-114.3	-160.9 to -67.73	Yes	****	<0.0001	D-F
ISG-15 vs. NM-WT-ISG15	14.67	-31.94 to 61.27	No	ns	0.9501	D-G
ISG-15 vs. NM-KA-ISG15	-29.67	-76.27 to 16.94	No	ns	0.3983	D-H
NM-WT+ISG15 vs. NM-KA+ISG15	-119	-165.6 to -72.39	Yes	****	<0.0001	E-F
NM-WT+ISG15 vs. NM-WT-ISG15	10	-36.61 to 56.61	No	ns	0.994	E-G
NM-WT+ISG15 vs. NM-KA-ISG15	-34.33	-80.94 to 12.27	No	ns	0.243	E-H
NM-KA+ISG15 vs. NM-WT-ISG15	129	82.39 to 175.6	Yes	****	<0.0001	F-G
NM-KA+ISG15 vs. NM-KA-ISG15	84.67	38.06 to 131.3	Yes	***	0.0002	F-H
NM-WT-ISG15 vs. NM-KA-ISG15	-44.33	-90.94 to 2.274	No	ns	0.0684	G-H
Test details	Mean 1	Mean 2	Mean Diff.	SE of diff.	n1	n2	q	DF
GFP vs. NM-WT	126.7	120.7	6	13.46	3	3	0.6303	16
GFP vs. NM-KA	126.7	203.7	-77	13.46	3	3	8.089	16
GFP vs. ISG-15	126.7	47.67	79	13.46	3	3	8.299	16
GFP vs. NM-WT+ISG15	126.7	43	83.67	13.46	3	3	8.789	16
GFP vs. NM-KA+ISG15	126.7	162	-35.33	13.46	3	3	3.712	16
GFP vs. NM-WT-ISG15	126.7	33	93.67	13.46	3	3	9.84	16
GFP vs. NM-KA-ISG15	126.7	77.33	49.33	13.46	3	3	5.183	16
NM-WT vs. NM-KA	120.7	203.7	-83	13.46	3	3	8.719	16
NM-WT vs. ISG-15	120.7	47.67	73	13.46	3	3	7.669	16
NM-WT vs. NM-WT+ISG15	120.7	43	77.67	13.46	3	3	8.159	16
NM-WT vs. NM-KA+ISG15	120.7	162	-41.33	13.46	3	3	4.342	16
NM-WT vs. NM-WT-ISG15	120.7	33	87.67	13.46	3	3	9.21	16
NM-WT vs. NM-KA-ISG15	120.7	77.33	43.33	13.46	3	3	4.552	16
NM-KA vs. ISG-15	203.7	47.67	156	13.46	3	3	16.39	16
NM-KA vs. NM-WT+ISG15	203.7	43	160.7	13.46	3	3	16.88	16
NM-KA vs. NM-KA+ISG15	203.7	162	41.67	13.46	3	3	4.377	16
NM-KA vs. NM-WT-ISG15	203.7	33	170.7	13.46	3	3	17.93	16
NM-KA vs. NM-KA-ISG15	203.7	77.33	126.3	13.46	3	3	13.27	16
ISG-15 vs. NM-WT+ISG15	47.67	43	4.667	13.46	3	3	0.4902	16
ISG-15 vs. NM-KA+ISG15	47.67	162	-114.3	13.46	3	3	12.01	16
ISG-15 vs. NM-WT-ISG15	47.67	33	14.67	13.46	3	3	1.541	16
ISG-15 vs. NM-KA-ISG15	47.67	77.33	-29.67	13.46	3	3	3.117	16
NM-WT+ISG15 vs. NM-KA+ISG15	43	162	-119	13.46	3	3	12.5	16
NM-WT+ISG15 vs. NM-WT-ISG15	43	33	10	13.46	3	3	1.051	16
NM-WT+ISG15 vs. NM-KA-ISG15	43	77.33	-34.33	13.46	3	3	3.607	16
NM-KA+ISG15 vs. NM-WT-ISG15	162	33	129	13.46	3	3	13.55	16
NM-KA+ISG15 vs. NM-KA-ISG15	162	77.33	84.67	13.46	3	3	8.895	16
NM-WT-ISG15 vs. NM-KA-ISG15	33	77.33	-44.33	13.46	3	3	4.657	16
