# Supplementary material for: Inflammatory osteolysis is regulated by site-specific ISGylation of the scaffold protein NEMO
Source: eLife. 2020 Mar 23;9:e56095. doi: 10.7554/eLife.56095 (PMC7145425; doi:10.7554/eLife.56095)
Supplement: Figure 7—source data 4. [file elife-56095-fig7-data4.xlsx]

## Sheet: Fig 7B
Raw Data
TRAP positive cells
NMWT-GFP	NMWT-ISG15	NMK270A-GFP	NMK270A-ISG15
205	5	535	495
145	75	495	425
345	125	415	375
185	35	375	315
235	45	475	325
255	55	355	305
This file contains 1 data tables and 1 info tables:
Ordinary one-way ANOVA of TRAP count ISG15 overexpression:ANOVA results
	Data Set-A	Data Set-B	Data Set-C	Data Set-D	Data Set-E
Table Analyzed	TRAP count ISG15 overexpression
Data sets analyzed	A-D
ANOVA summary
F	40.97
P value	<0.0001
P value summary	****
Significant diff. among means (P < 0.05)?	Yes
R squared	0.86
Brown-Forsythe test
F (DFn, DFd)	0.9281 (3, 20)
P value	0.4454
P value summary	ns
Are SDs significantly different (P < 0.05)?	No
Bartlett's test
Bartlett's statistic (corrected)	1.824
P value	0.6098
P value summary	ns
Are SDs significantly different (P < 0.05)?	No
ANOVA table	SS	DF	MS	F (DFn, DFd)	P value
Treatment (between columns)	523767	3	174589	F (3, 20) = 40.97	P<0.0001
Residual (within columns)	85233	20	4262
Total	609000	23
Data summary
Number of treatments (columns)	4
Number of values (total)	24
This file can be opened by GraphPad Prism (version 5.00 or later).
This file contains 1 data tables and 1 info tables:
Ordinary one-way ANOVA of TRAP count ISG15 overexpression:Multiple comparisons
Ordinary one-way ANOVA of TRAP count ISG15 overexpression:Multiple comparisons
	Data Set-A	Data Set-B	Data Set-C	Data Set-D	Data Set-E	Data Set-F	Data Set-G	Data Set-H
Number of families	1
Number of comparisons per family	6
Alpha	0.05
Tukey's multiple comparisons test	Mean Diff.	95.00% CI of diff.	Significant?	Summary	Adjusted P Value
NMWT-GFP vs. NMWT-ISG15	171.7	66.17 to 277.2	Yes	**	0.001	A-B
NMWT-GFP vs. NMK270A-GFP	-213.3	-318.8 to -107.8	Yes	****	<0.0001	A-C
NMWT-GFP vs. NMK270A-ISG15	-145	-250.5 to -39.51	Yes	**	0.0051	A-D
NMWT-ISG15 vs. NMK270A-GFP	-385	-490.5 to -279.5	Yes	****	<0.0001	B-C
NMWT-ISG15 vs. NMK270A-ISG15	-316.7	-422.2 to -211.2	Yes	****	<0.0001	B-D
NMK270A-GFP vs. NMK270A-ISG15	68.33	-37.16 to 173.8	No	ns	0.2966	C-D
Test details	Mean 1	Mean 2	Mean Diff.	SE of diff.	n1	n2	q	DF
NMWT-GFP vs. NMWT-ISG15	228.3	56.67	171.7	37.69	6	6	6.441	20
NMWT-GFP vs. NMK270A-GFP	228.3	441.7	-213.3	37.69	6	6	8.005	20
NMWT-GFP vs. NMK270A-ISG15	228.3	373.3	-145	37.69	6	6	5.441	20
NMWT-ISG15 vs. NMK270A-GFP	56.67	441.7	-385	37.69	6	6	14.45	20
NMWT-ISG15 vs. NMK270A-ISG15	56.67	373.3	-316.7	37.69	6	6	11.88	20
NMK270A-GFP vs. NMK270A-ISG15	441.7	373.3	68.33	37.69	6	6	2.564	20

## Sheet: Fig 7D
Change in LC3-GFP
	NM-WT	NM-KA
	-21.6885	-11.1744
	-13.2261	-5.74352
	-21.555	-8.78553
Avg	-18.8232	-8.56782
Stdev	4.84769	2.72198
Unpaired t test of WT vs KA with ISG15
	Data Set-A
Table Analyzed	WT vs KA with ISG15
Column B	NM-KA
vs.	vs.
Column A	NM-WT
Unpaired t test
P value	0.0331
P value summary	*
Significantly different (P < 0.05)?	Yes
One- or two-tailed P value?	Two-tailed
t, df	t=3.195, df=4
How big is the difference?
Mean of column A	-18.82
Mean of column B	-8.568
Difference between means (B - A) ± SEM	10.26 ± 3.210
95% confidence interval	1.343 to 19.17
R squared (eta squared)	0.7185
F test to compare variances
F, DFn, Dfd	3.172, 2, 2
P value	0.4794
P value summary	ns
Significantly different (P < 0.05)?	No
Data analyzed
Sample size, column A	3
Sample size, column B	3

## Sheet: Fig 7F
Raw data
TRAP positive cells
GFP	NM-WT	NM-KA	ISG-15	NM-WT+ISG15	NM-KA+ISG15	NM-WT-ISG15	NM-KA-ISG15
131	85	201	45	40	162	35	63
148	134	198	50	51	180	33	78
101	143	212	48	38	144	31	91
This file contains 1 data tables and 1 info tables:
Ordinary one-way ANOVA of Fig 6+NM-ISG15 fusion TRAP OC calcualtion:ANOVA results
	Data Set-A	Data Set-B	Data Set-C	Data Set-D	Data Set-E
Table Analyzed	Fig 6+NM-ISG15 fusion TRAP OC calcualtion
Data sets analyzed	A-H
ANOVA summary
F	42.09
P value	<0.0001
P value summary	****
Significant diff. among means (P < 0.05)?	Yes
R squared	0.9485
Brown-Forsythe test
F (DFn, DFd)	0.9284 (7, 16)
P value	0.5112
P value summary	ns
Are SDs significantly different (P < 0.05)?	No
Bartlett's test
Bartlett's statistic (corrected)
P value
P value summary
Are SDs significantly different (P < 0.05)?
ANOVA table	SS	DF	MS	F (DFn, DFd)	P value
Treatment (between columns)	80085	7	11441	F (7, 16) = 42.09	P<0.0001
Residual (within columns)	4349	16	271.8
Total	84435	23
Data summary
Number of treatments (columns)	8
Number of values (total)	24
This file contains 1 data tables and 1 info tables:
Ordinary one-way ANOVA of Fig 6+NM-ISG15 fusion TRAP OC calcualtion:Multiple comparisons
	Data Set-A	Data Set-B	Data Set-C	Data Set-D	Data Set-E	Data Set-F	Data Set-G	Data Set-H
Number of families	1
Number of comparisons per family	28
Alpha	0.05
Tukey's multiple comparisons test	Mean Diff.	95.00% CI of diff.	Significant?	Summary	Adjusted P Value
GFP vs. NM-WT	6	-40.61 to 52.61	No	ns	0.9998	A-B
GFP vs. NM-KA	-77	-123.6 to -30.39	Yes	***	0.0007	A-C
GFP vs. ISG-15	79	32.39 to 125.6	Yes	***	0.0005	A-D
GFP vs. NM-WT+ISG15	83.67	37.06 to 130.3	Yes	***	0.0003	A-E
GFP vs. NM-KA+ISG15	-35.33	-81.94 to 11.27	No	ns	0.2164	A-F
GFP vs. NM-WT-ISG15	93.67	47.06 to 140.3	Yes	****	<0.0001	A-G
GFP vs. NM-KA-ISG15	49.33	2.726 to 95.94	Yes	*	0.0341	A-H
NM-WT vs. NM-KA	-83	-129.6 to -36.39	Yes	***	0.0003	B-C
NM-WT vs. ISG-15	73	26.39 to 119.6	Yes	**	0.0011	B-D
NM-WT vs. NM-WT+ISG15	77.67	31.06 to 124.3	Yes	***	0.0006	B-E
NM-WT vs. NM-KA+ISG15	-41.33	-87.94 to 5.274	No	ns	0.1022	B-F
NM-WT vs. NM-WT-ISG15	87.67	41.06 to 134.3	Yes	***	0.0002	B-G
NM-WT vs. NM-KA-ISG15	43.33	-3.274 to 89.94	No	ns	0.0783	B-H
NM-KA vs. ISG-15	156	109.4 to 202.6	Yes	****	<0.0001	C-D
NM-KA vs. NM-WT+ISG15	160.7	114.1 to 207.3	Yes	****	<0.0001	C-E
NM-KA vs. NM-KA+ISG15	41.67	-4.940 to 88.27	No	ns	0.0978	C-F
NM-KA vs. NM-WT-ISG15	170.7	124.1 to 217.3	Yes	****	<0.0001	C-G
NM-KA vs. NM-KA-ISG15	126.3	79.73 to 172.9	Yes	****	<0.0001	C-H
ISG-15 vs. NM-WT+ISG15	4.667	-41.94 to 51.27	No	ns	>0.9999	D-E
ISG-15 vs. NM-KA+ISG15	-114.3	-160.9 to -67.73	Yes	****	<0.0001	D-F
ISG-15 vs. NM-WT-ISG15	14.67	-31.94 to 61.27	No	ns	0.9501	D-G
ISG-15 vs. NM-KA-ISG15	-29.67	-76.27 to 16.94	No	ns	0.3983	D-H
NM-WT+ISG15 vs. NM-KA+ISG15	-119	-165.6 to -72.39	Yes	****	<0.0001	E-F
NM-WT+ISG15 vs. NM-WT-ISG15	10	-36.61 to 56.61	No	ns	0.994	E-G
NM-WT+ISG15 vs. NM-KA-ISG15	-34.33	-80.94 to 12.27	No	ns	0.243	E-H
NM-KA+ISG15 vs. NM-WT-ISG15	129	82.39 to 175.6	Yes	****	<0.0001	F-G
NM-KA+ISG15 vs. NM-KA-ISG15	84.67	38.06 to 131.3	Yes	***	0.0002	F-H
NM-WT-ISG15 vs. NM-KA-ISG15	-44.33	-90.94 to 2.274	No	ns	0.0684	G-H
Test details	Mean 1	Mean 2	Mean Diff.	SE of diff.	n1	n2	q	DF
GFP vs. NM-WT	126.7	120.7	6	13.46	3	3	0.6303	16
GFP vs. NM-KA	126.7	203.7	-77	13.46	3	3	8.089	16
GFP vs. ISG-15	126.7	47.67	79	13.46	3	3	8.299	16
GFP vs. NM-WT+ISG15	126.7	43	83.67	13.46	3	3	8.789	16
GFP vs. NM-KA+ISG15	126.7	162	-35.33	13.46	3	3	3.712	16
GFP vs. NM-WT-ISG15	126.7	33	93.67	13.46	3	3	9.84	16
GFP vs. NM-KA-ISG15	126.7	77.33	49.33	13.46	3	3	5.183	16
NM-WT vs. NM-KA	120.7	203.7	-83	13.46	3	3	8.719	16
NM-WT vs. ISG-15	120.7	47.67	73	13.46	3	3	7.669	16
NM-WT vs. NM-WT+ISG15	120.7	43	77.67	13.46	3	3	8.159	16
NM-WT vs. NM-KA+ISG15	120.7	162	-41.33	13.46	3	3	4.342	16
NM-WT vs. NM-WT-ISG15	120.7	33	87.67	13.46	3	3	9.21	16
NM-WT vs. NM-KA-ISG15	120.7	77.33	43.33	13.46	3	3	4.552	16
NM-KA vs. ISG-15	203.7	47.67	156	13.46	3	3	16.39	16
NM-KA vs. NM-WT+ISG15	203.7	43	160.7	13.46	3	3	16.88	16
NM-KA vs. NM-KA+ISG15	203.7	162	41.67	13.46	3	3	4.377	16
NM-KA vs. NM-WT-ISG15	203.7	33	170.7	13.46	3	3	17.93	16
NM-KA vs. NM-KA-ISG15	203.7	77.33	126.3	13.46	3	3	13.27	16
ISG-15 vs. NM-WT+ISG15	47.67	43	4.667	13.46	3	3	0.4902	16
ISG-15 vs. NM-KA+ISG15	47.67	162	-114.3	13.46	3	3	12.01	16
ISG-15 vs. NM-WT-ISG15	47.67	33	14.67	13.46	3	3	1.541	16
ISG-15 vs. NM-KA-ISG15	47.67	77.33	-29.67	13.46	3	3	3.117	16
NM-WT+ISG15 vs. NM-KA+ISG15	43	162	-119	13.46	3	3	12.5	16
NM-WT+ISG15 vs. NM-WT-ISG15	43	33	10	13.46	3	3	1.051	16
NM-WT+ISG15 vs. NM-KA-ISG15	43	77.33	-34.33	13.46	3	3	3.607	16
NM-KA+ISG15 vs. NM-WT-ISG15	162	33	129	13.46	3	3	13.55	16
NM-KA+ISG15 vs. NM-KA-ISG15	162	77.33	84.67	13.46	3	3	8.895	16
NM-WT-ISG15 vs. NM-KA-ISG15	33	77.33	-44.33	13.46	3	3	4.657	16

## Sheet: Fig 7H
% LC3 puncta+ cells
GFP	NM-WT	NM-KA	ISG15	NM-WT+ISG15	NM-KA+ISG15	NM-WT::ISG15	NMWT::ISG15
35.7	25	43.8	12.1	18.2	28.6	21.4	12.5
31.6	15.6	33.3	8.6	20	25	20	11.1
25	25	23.1	15	19	36.4	14.3	15
32	23.1	50	25	14.3	33.3	12.5	14.3
37.5	27.8	44.4	27.3	16.7	33.3	12.5	9.5
36.4	14.3	35.3	25	25	33.3	18.2	18.2
25	21.4	30	20	12.5	42.9	11.1	15.8
38.9	27.3	48.3	20	16.7	25	6.3	9.7
33.3	35	57.1	7.7	12.9	28.6	14.3	12.5
25	33.3	40	14.3	25	33.3	12.5	17.6
Ordinary one-way ANOVA of LC3 puncta Qt:ANOVA results
	Data Set-A	Data Set-B	Data Set-C	Data Set-D	Data Set-E
Table Analyzed	LC3 puncta Qt
Data sets analyzed	A-H
ANOVA summary
F	25.42
P value	<0.0001
P value summary	****
Significant diff. among means (P < 0.05)?	Yes
R squared	0.712
Brown-Forsythe test
F (DFn, DFd)	2.544 (7, 72)
P value	0.0213
P value summary	*
Are SDs significantly different (P < 0.05)?	Yes
Bartlett's test
Bartlett's statistic (corrected)	15.89
P value	0.0261
P value summary	*
Are SDs significantly different (P < 0.05)?	Yes
ANOVA table	SS	DF	MS	F (DFn, DFd)	P value
Treatment (between columns)	6815	7	973.5	F (7, 72) = 25.42	P<0.0001
Residual (within columns)	2757	72	38.29
Total	9572	79
Data summary
Number of treatments (columns)	8
Number of values (total)	80
Ordinary one-way ANOVA of LC3 puncta Qt:Multiple comparisons
	Data Set-A	Data Set-B	Data Set-C	Data Set-D	Data Set-E	Data Set-F	Data Set-G	Data Set-H
Number of families	1
Number of comparisons per family	28
Alpha	0.05
Tukey's multiple comparisons test	Mean Diff.	95.00% CI of diff.	Significant?	Summary	Adjusted P Value
GFP vs. NM-WT	7.26	-1.379 to 15.90	No	ns	0.1647	A-B
GFP vs. NM-KA	-8.49	-17.13 to 0.1494	No	ns	0.0576	A-C
GFP vs. ISG15	14.54	5.901 to 23.18	Yes	****	<0.0001	A-D
GFP vs. NM-WT+ISG15	14.01	5.371 to 22.65	Yes	****	<0.0001	A-E
GFP vs. NM-KA+ISG15	0.07	-8.569 to 8.709	No	ns	>0.9999	A-F
GFP vs. NM-WT::ISG15	17.73	9.091 to 26.37	Yes	****	<0.0001	A-G
GFP vs. NMWT::ISG15	18.42	9.781 to 27.06	Yes	****	<0.0001	A-H
NM-WT vs. NM-KA	-15.75	-24.39 to -7.111	Yes	****	<0.0001	B-C
NM-WT vs. ISG15	7.28	-1.359 to 15.92	No	ns	0.1621	B-D
NM-WT vs. NM-WT+ISG15	6.75	-1.889 to 15.39	No	ns	0.2389	B-E
NM-WT vs. NM-KA+ISG15	-7.19	-15.83 to 1.449	No	ns	0.1737	B-F
NM-WT vs. NM-WT::ISG15	10.47	1.831 to 19.11	Yes	**	0.0073	B-G
NM-WT vs. NMWT::ISG15	11.16	2.521 to 19.80	Yes	**	0.0032	B-H
NM-KA vs. ISG15	23.03	14.39 to 31.67	Yes	****	<0.0001	C-D
NM-KA vs. NM-WT+ISG15	22.5	13.86 to 31.14	Yes	****	<0.0001	C-E
NM-KA vs. NM-KA+ISG15	8.56	-0.07940 to 17.20	No	ns	0.0539	C-F
NM-KA vs. NM-WT::ISG15	26.22	17.58 to 34.86	Yes	****	<0.0001	C-G
NM-KA vs. NMWT::ISG15	26.91	18.27 to 35.55	Yes	****	<0.0001	C-H
ISG15 vs. NM-WT+ISG15	-0.53	-9.169 to 8.109	No	ns	>0.9999	D-E
ISG15 vs. NM-KA+ISG15	-14.47	-23.11 to -5.831	Yes	****	<0.0001	D-F
ISG15 vs. NM-WT::ISG15	3.19	-5.449 to 11.83	No	ns	0.9424	D-G
ISG15 vs. NMWT::ISG15	3.88	-4.759 to 12.52	No	ns	0.8534	D-H
NM-WT+ISG15 vs. NM-KA+ISG15	-13.94	-22.58 to -5.301	Yes	****	<0.0001	E-F
NM-WT+ISG15 vs. NM-WT::ISG15	3.72	-4.919 to 12.36	No	ns	0.8786	E-G
NM-WT+ISG15 vs. NMWT::ISG15	4.41	-4.229 to 13.05	No	ns	0.7525	E-H
NM-KA+ISG15 vs. NM-WT::ISG15	17.66	9.021 to 26.30	Yes	****	<0.0001	F-G
NM-KA+ISG15 vs. NMWT::ISG15	18.35	9.711 to 26.99	Yes	****	<0.0001	F-H
NM-WT::ISG15 vs. NMWT::ISG15	0.69	-7.949 to 9.329	No	ns	>0.9999	G-H
Test details	Mean 1	Mean 2	Mean Diff.	SE of diff.	n1	n2	q	DF
GFP vs. NM-WT	32.04	24.78	7.26	2.767	10	10	3.71	72
GFP vs. NM-KA	32.04	40.53	-8.49	2.767	10	10	4.339	72
GFP vs. ISG15	32.04	17.5	14.54	2.767	10	10	7.43	72
GFP vs. NM-WT+ISG15	32.04	18.03	14.01	2.767	10	10	7.159	72
GFP vs. NM-KA+ISG15	32.04	31.97	0.07	2.767	10	10	0.03577	72
GFP vs. NM-WT::ISG15	32.04	14.31	17.73	2.767	10	10	9.06	72
GFP vs. NMWT::ISG15	32.04	13.62	18.42	2.767	10	10	9.413	72
NM-WT vs. NM-KA	24.78	40.53	-15.75	2.767	10	10	8.049	72
NM-WT vs. ISG15	24.78	17.5	7.28	2.767	10	10	3.72	72
NM-WT vs. NM-WT+ISG15	24.78	18.03	6.75	2.767	10	10	3.449	72
NM-WT vs. NM-KA+ISG15	24.78	31.97	-7.19	2.767	10	10	3.674	72
NM-WT vs. NM-WT::ISG15	24.78	14.31	10.47	2.767	10	10	5.35	72
NM-WT vs. NMWT::ISG15	24.78	13.62	11.16	2.767	10	10	5.703	72
NM-KA vs. ISG15	40.53	17.5	23.03	2.767	10	10	11.77	72
NM-KA vs. NM-WT+ISG15	40.53	18.03	22.5	2.767	10	10	11.5	72
NM-KA vs. NM-KA+ISG15	40.53	31.97	8.56	2.767	10	10	4.374	72
NM-KA vs. NM-WT::ISG15	40.53	14.31	26.22	2.767	10	10	13.4	72
NM-KA vs. NMWT::ISG15	40.53	13.62	26.91	2.767	10	10	13.75	72
ISG15 vs. NM-WT+ISG15	17.5	18.03	-0.53	2.767	10	10	0.2708	72
ISG15 vs. NM-KA+ISG15	17.5	31.97	-14.47	2.767	10	10	7.394	72
ISG15 vs. NM-WT::ISG15	17.5	14.31	3.19	2.767	10	10	1.63	72
ISG15 vs. NMWT::ISG15	17.5	13.62	3.88	2.767	10	10	1.983	72
NM-WT+ISG15 vs. NM-KA+ISG15	18.03	31.97	-13.94	2.767	10	10	7.124	72
NM-WT+ISG15 vs. NM-WT::ISG15	18.03	14.31	3.72	2.767	10	10	1.901	72
NM-WT+ISG15 vs. NMWT::ISG15	18.03	13.62	4.41	2.767	10	10	2.254	72
NM-KA+ISG15 vs. NM-WT::ISG15	31.97	14.31	17.66	2.767	10	10	9.025	72
NM-KA+ISG15 vs. NMWT::ISG15	31.97	13.62	18.35	2.767	10	10	9.377	72
NM-WT::ISG15 vs. NMWT::ISG15	14.31	13.62	0.69	2.767	10	10	0.3526	72
