# Supplementary material for: Inflammatory osteolysis is regulated by site-specific ISGylation of the scaffold protein NEMO
Source: eLife journal article supplement (doi:10.7554/elife.56095), 2020-03-23

**Figure 3S**

**Mem 1.1 (10%)**

**IB: Rb phos-p65 (Licor 800)**

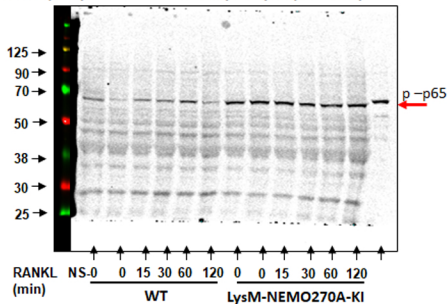

**Mem 1.2 (10%)**

**IB: Rb total-p65 (Licor 800)**

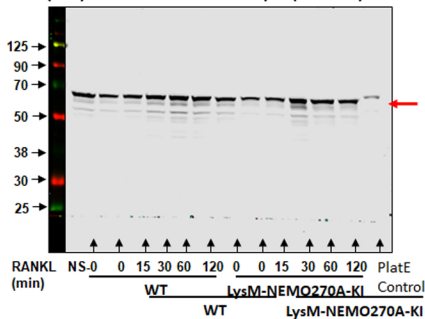

**Mem 1.4 (10%)**

**IB: ACTIN (Licor 680 only)**

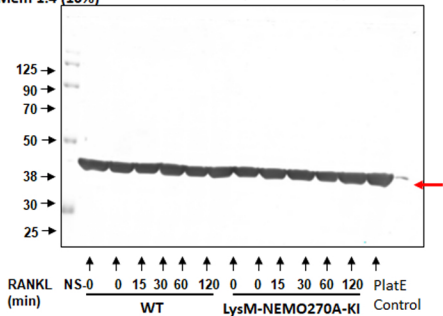

Supplement: supp [file elife-56095-supp-v1.zip]
