# Supplementary material for: Inflammatory osteolysis is regulated by site-specific ISGylation of the scaffold protein NEMO
Source: eLife journal article supplement (doi:10.7554/elife.56095), 2020-03-23
Supplement: supp [file elife-56095-supp-v1.zip]

Figure 6C

IB: ISG15 mouse (Licor secondary 680)

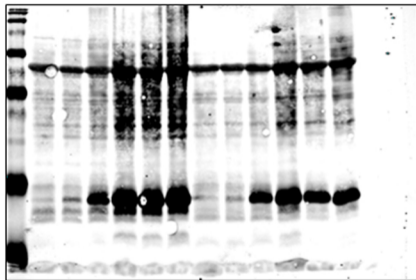

RANKL (hr) 0 3 6 12 24 48 0 3 6 12 24 48  
NM-WT NM-KA

IB: ACTIN mouse (Licor secondary 680)

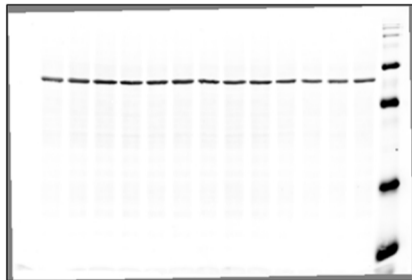

RANKL (hr) 0 3 6 12 24 48 0 3 6 12 24 48  
NM-WT NM-KA
