# Supplementary material for: Inflammatory osteolysis is regulated by site-specific ISGylation of the scaffold protein NEMO
Source: eLife journal article supplement (doi:10.7554/elife.56095), 2020-03-23

**Figure 4E**

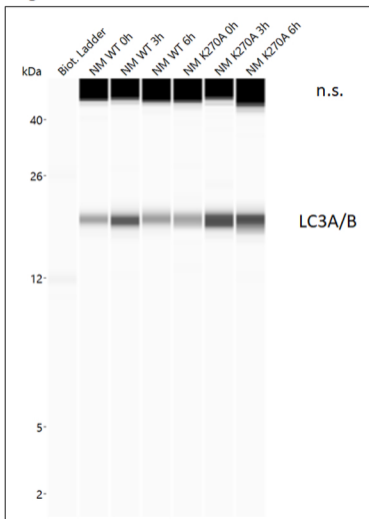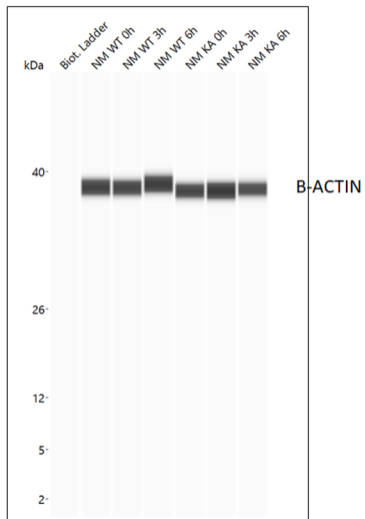

Supplement: supp [file elife-56095-supp-v1.zip]
